# Supplementary material for: Missing or Underrated Super-emitters of Nitrogen Oxides in China Exposed from Space
Source: Research Square preprint supplement (doi:10.21203/rs.3.rs-417977/v1), 2021-04-20
Supplement: Supplementary file 1 [file 767785e23909f6011adb8ec5.xlsx]

## Sheet: Cities
ID	Name	min_lat	min_lon	max_lat	max_lon	E	E_min	E_max	MEIC
1	Beijing	39.9092	116.397	39.9092	116.397	20.1512	5.66269	72.7696	7.99604
2	Guangzhou	23.1333	113.267	23.1333	113.267	5.83763	0.985416	25.0437	5.72322
3	Lhasa	29.6534	91.1721	29.6534	91.1721	1.18618	0.180379	4.78691	0.366914
4	Shanghai	31.2306	121.474	31.2306	121.474	7.82106	0.79081	34.1542	10.0198
5	Shenzhen	22.5434	114.058	22.5434	114.058	2.04507	0.283949	9.00292	4.88923
6	Shizuishan	38.9846	106.383	38.9846	106.383	2.03422	0.526724	7.57602	1.70572
7	Yongan	25.9417	117.365	25.9417	117.365	1.07888	0.265631	4.26129	0.192781

## Sheet: Rural areas
ID	Name	min_lat	min_lon	max_lat	max_lon	E	E_min	E_max	MEIC
1	Chetian	24.9943	103.191	25.0197	103.235	0.000377692	0.000106269	0.00128243	0.000180878
2	Jiqingbao	40.172	115.284	40.189	115.301	0.00163103	0.00105785	0.00354163	8.54e-05
3	Pangjing	31.115	117.492	31.1216	117.5	0.00178001	0.000675865	0.00546255	6.78e-05

## Sheet: Super-emitters
ID	Name	Latitude	Longitude	Max_Latitude	Max_Longitude	E_everage	E_min	E_max	MEIC	Type
1	Baihetan	27.2173	102.61	27.2218	102.616	0.000109012	1.05e-05	0.000439083	4.03e-06	IH
2	Baitong	36.5702	101.527	36.5747	101.535	0.000434202	1.99e-06	0.00207985	0.000371662	IP
3	Beiying	41.2197	123.612	41.2332	123.634	0.00166489	0.000770466	0.00466256	5.14e-05	IP
4	Chengbei	40.5632	95.7435	40.5677	95.7494	8.47e-05	9.01e-06	0.000336917	2.28e-06	IH
5	Daguohe	37.6359	105.233	37.6449	105.239	0.000288562	3.51e-05	0.0011334	0.000237533	IH
6	Daqing	46.4313	125.207	46.4313	125.207	0.000544146	0.000209769	0.00166445	0.000418978	IP
7	Geermu	36.7816	95.222	36.7906	95.2276	8.23e-05	2.34e-05	0.000257932	3.01e-07	IP
8	Guolemude	35.9902	94.8305	35.9902	94.8305	5.42e-05	2.03e-06	0.000235851	2.51e-08	IH
9	Hailuo	35.4685	106.677	35.4685	106.677	0.000318097	3.95e-05	0.00124843	1.03e-05	IH
10	Hejing	42.6766	86.2864	42.6811	86.2925	8.24e-05	2.58e-06	0.000369235	9.33e-07	IH
11	Huagang	30.0816	112.31	30.0816	112.31	0.00073504	4.55e-05	0.00316236	3.81e-05	IH
12	Huaxin	29.2632	91.9268	29.2632	91.9268	7.29e-05	5.95e-07	0.000321508	5.19e-06	IH
13	Hunhe	41.7346	123.2	41.7346	123.2	0.00153212	0.000670972	0.00457167	0.00802761	IH
14	Jiangtian	27.2488	105.385	27.2488	105.385	0.000415118	0.000102426	0.00145965	3.25e-05	IH
15	Jiaochuan	29.9917	121.658	29.9917	121.658	0.00098061	0.000129309	0.00382438	0.00216427	IP
16	Jincheng	35.6619	112.872	35.6664	112.884	0.00142781	0.000380395	0.00491917	0.00103243	IH
17	Lanxing	36.8175	103.213	36.8265	103.222	0.000272241	1.53e-06	0.00124908	2.84e-05	IP
18	Longmen	35.6169	110.577	35.6394	110.591	0.00128505	0.000141045	0.00514946	0.000679202	IP
19	Longzhudou	26.7766	119.754	26.7901	119.771	0.000132471	4.12e-06	0.0015337	3.59e-05	IH
20	Luopu	36.9974	80.1962	36.9974	80.1962	0.000120062	1.35e-05	0.000458739	1.67e-07	IH
21	Maligou	36.5927	104.118	36.5927	104.118	0.000456486	0.000100047	0.00164461	0.000503308	IH
22	Mengsheng	23.3457	99.4099	23.3457	99.4099	0.000182363	9.57e-05	0.000473793	6.94e-06	IH
23	Mingcheng	43.1982	126.002	43.2027	126.012	0.000541516	0.000200539	0.00167811	3.28e-05	IH
24	Mudanjiang	44.6506	129.642	44.6506	129.642	0.000751576	0.000470625	0.00174453	0.000664813	IH
25	Nanbao	39.05	118.52	38.9669	118.522	0.00116641	0.000210621	0.00456574	0	IP
26	Nanzamu	41.9616	124.394	41.9616	124.394	0.00125082	0.00089256	0.00301394	4.23e-05	IH
27	Peijiafen	39.9562	118.559	39.9831	118.582	0.00228745	0.000863115	0.00703774	0.00205602	IP
28	Rundajianeng	43.6928	95.0119	43.7063	95.043	0.000314986	0.000117883	0.00114105	6.74e-06	IH
29	Sanbaotun	41.8402	123.76	41.8447	123.774	0.00103304	5.02e-05	0.00481284	0.00177548	IP
30	Shengbang	38.7061	110.177	38.7151	110.186	0.000497542	6.85e-05	0.00213916	0.000129381	IP
31	Shidian	39.0736	117.003	39.0736	117.003	0.00186783	0.000500807	0.00597823	0.00534949	IP
32	Shizuishan	39.3806	106.911	39.3986	106.939	0.000864219	0.000143343	0.00328968	0.000843324	IP
33	Tanjiazui	30.918	110.71	30.918	110.71	0.000295142	4.06e-05	0.0011435	5.14e-06	IH
34	Tianhua	39.0613	106.107	39.0658	106.115	0.000353422	0.00010407	0.0011846	9.72e-06	IH
35	Xincheng	37.862	115.325	37.862	115.325	0.00116246	1.88e-05	0.00550404	0.000180878	IP
36	Yongbao	26.3449	100.635	26.3494	100.64	8.57e-05	4.82e-06	0.000360512	1.76e-05	IP
37	Zeketai	43.7108	83.2814	43.7153	83.2886	0.000235731	4.32e-05	0.000944182	2.14e-05	IH
38	Zhongjing	26.6642	104.744	26.6642	104.744	0.000414707	0.000163578	0.00125181	1.06e-05	IH
39	Zhongluan	40.9454	117.714	40.9544	117.732	0.00133752	0.000433179	0.00463102	0.000166736	IP
