# Supplementary material for: Missing or Underrated Super-emitters of Nitrogen Oxides in China Exposed from Space
Source: Research Square preprint supplement (doi:10.21203/rs.3.rs-417977/v1), 2021-04-20
Supplement: Supplementary file 2 [file 89260efbc5d1197f19cd2b74.xlsx]

## Sheet: Super-emitters
Num	Type	ID	Region	Province	Name	Central Latitude	Central Longitude	Minimum Latitude	Minimum Longitude	Maxmum Latitude	Maxmum Longitude	E(Unit:kg/s)	MEIC(Unit:kg/s)	E/MEIC
1	Industrial Park	IP0001	East China	Jiangsu		32.2489	119.621	32.2387	119.612	32.2569	119.626	0.00129474	0.00052335	2.47395
2	Industrial Park	IP0002	North China	Hebei		39.8647	118.172	39.8479	118.158	39.8823	118.186	0.00182288	0.000571829	3.18781
3	Industrial Park	IP0003	North China	Liaoning		40.6361	122.562	40.6249	122.55	40.6486	122.574	0.00133005	0.000413211	3.21882
4	Industrial Hotspot	IH0004	North China	Liaoning		40.698	122.424	40.698	122.424	40.698	122.424	0.00149861	0.000922647	1.62425
5	Industrial Park	IP0005	Northeast China	Liaoning	Sanbaotun	41.8415	123.754	41.8326	123.741	41.8482	123.765	0.00103304	0.00177548	0.581837
6	Industrial Hotspot	IH0006	Southwest China	Yunnan		25.1425	102.079	25.1425	102.079	25.1425	102.079	0.000144517	3.44306e-05	4.19735
7	Industrial Park	IP0007	Southwest China	Sichuan		27.7456	102.206	27.7292	102.195	27.7604	102.22	0.000301281	3.37476e-05	8.92748
8	Industrial Hotspot	IH0008	Southwest China	Sichuan		26.6116	101.601	26.6116	101.601	26.6116	101.601	0.000362153	0.000531116	0.681872
9	Industrial Park	IP0009	North China	Inner Mongolia	Shizuishan	39.3808	106.916	39.3549	106.886	39.4049	106.944	0.000864219	0.000843324	1.02478
10	Industrial Hotspot	IH0010	North China	Inner Mongolia		40.9147	112.59	40.9147	112.59	40.9147	112.59	0.000293786	0.000222615	1.3197
11	Industrial Hotspot	IH0011	North China	Inner Mongolia		39.4639	106.92	39.4639	106.92	39.4639	106.92	0.000762982	0.000843324	0.904732
12	Industrial Park	IP0012	North China	Hebei		38.0575	114.564	38.0513	114.557	38.0631	114.571	0.00194307	0.00157544	1.23335
13	Industrial Park	IP0013	North China	Hebei		39.2576	119.033	39.2305	118.999	39.2831	119.069	0.00109313	3.53312e-05	30.9395
14	Industrial Park	IP0014	North China	Tianjin		39.0277	117.496	39.016	117.465	39.041	117.523	0.00187665	0.00138874	1.35133
15	Industrial Park	IP0015	North China	Shanxi		37.0658	111.83	37.0374	111.786	37.0932	111.859	0.00139135	0.00144708	0.961487
16	Industrial Park	IP0016	North China	Shanxi		36.3725	113.022	36.3666	113.01	36.3773	113.043	0.00119857	0.000674045	1.77817
17	Industrial Hotspot	IH0017	North China	Shanxi		37.1194	112.151	37.1194	112.151	37.1194	112.151	0.0008354	0.000317071	2.63474
18	Industrial Hotspot	IH0018	North China	Henan		34.7315	111.401	34.7315	111.401	34.7315	111.401	0.00081277	2.37296e-05	34.2513
19	Industrial Park	IP0019	North China	Shanxi		35.9339	111.498	35.9228	111.485	35.943	111.51	0.00086883	0.000209903	4.1392
20	Industrial Park	IP0020	North China	Shanxi		35.6843	111.232	35.6748	111.212	35.6986	111.249	0.00130061	0.00021683	5.99828
21	Industrial Hotspot	IH0021	North China	Shanxi		35.8833	111.304	35.8833	111.304	35.8833	111.304	0.00127258	0.00025764	4.93937
22	Industrial Hotspot	IH0022	North China	Shanxi		35.7856	110.687	35.7856	110.687	35.7856	110.687	0.00116153	4.36028e-05	26.6389
23	Industrial Park	IP0023	Northwest China	Shaanxi	Longmen	35.6152	110.574	35.593	110.552	35.6399	110.593	0.00128505	0.000679202	1.89199
24	Industrial Park	IP0024	North China	Shanxi		35.4145	111.304	35.3962	111.289	35.4244	111.334	0.00103446	9.44114e-05	10.957
25	Industrial Hotspot	IH0025	North China	Shanxi		35.2817	111.313	35.2817	111.313	35.2817	111.313	0.000707466	9.44114e-05	7.49343
26	Industrial Hotspot	IH0026	North China	Shanxi		35.9386	111.283	35.9386	111.283	35.9386	111.283	0.00136911	0.00025764	5.31404
27	Industrial Hotspot	IH0027	North China	Henan		34.2991	113.417	34.2991	113.417	34.2991	113.417	0.0012769	0.000128748	9.91782
28	Industrial Park	IP0028	North China	Anhui		33.6117	116.577	33.6022	116.554	33.621	116.598	0.00101162	7.78016e-05	13.0026
29	Industrial Park	IP0029	North China	Shanxi		36.4525	113.111	36.4399	113.101	36.467	113.126	0.0010654	0.000692321	1.53888
30	Industrial Hotspot	IH0030	North China	Henan		34.2833	113.509	34.2833	113.509	34.2833	113.509	0.00117566	0.000274575	4.28175
31	Industrial Hotspot	IH0031	North China	Jiangsu		34.476	117.46	34.476	117.46	34.476	117.46	0.000956531	0.000308583	3.09975
32	Industrial Park	IP0032	North China	Hebei		36.5557	114.107	36.548	114.096	36.5658	114.119	0.00163839	0.00105849	1.54786
33	Industrial Park	IP0033	North China	Henan		33.8057	113.445	33.7959	113.432	33.8152	113.454	0.00111467	0.000239301	4.65803
34	Industrial Park	IP0034	North China	Henan		34.6832	111.025	34.6767	111.018	34.6892	111.033	0.000930832	0.000167074	5.57139
35	Industrial Hotspot	IH0035	North China	Henan		34.529	112.238	34.529	112.238	34.529	112.238	0.00100671	0.000476376	2.11326
36	Industrial Park	IP0036	North China	Henan		35.3768	113.448	35.364	113.439	35.3892	113.459	0.00132746	0.000114887	11.5545
37	Industrial Park	IP0037	North China	Henan		36.2201	114.056	36.2153	114.046	36.2249	114.068	0.00150198	0.000182242	8.24167
38	Industrial Hotspot	IH0038	North China	Shanxi		35.8619	112.962	35.8619	112.962	35.8619	112.962	0.000810809	0.000553287	1.46544
39	Industrial Park	IP0039	North China	Jiangsu		34.4007	117.957	34.3951	117.946	34.4072	117.967	0.000980247	0.000295644	3.31563
40	Industrial Hotspot	IH0040	North China	Henan		33.0829	112.211	33.0829	112.211	33.0829	112.211	0.000865143	8.72339e-05	9.91751
41	Industrial Park	IP0041	East China	Jiangsu		31.9611	120.373	31.9544	120.361	31.9677	120.384	0.00142446	0.00177681	0.801696
42	Industrial Hotspot	IH0042	East China	Hubei		32.4607	111.658	32.4607	111.658	32.4607	111.658	0.00078854	0.00025965	3.03694
43	Industrial Hotspot	IH0043	Southwest China	Sichuan		28.3164	102.195	28.3164	102.195	28.3164	102.195	0.000116989	2.4911e-05	4.69629
44	Industrial Hotspot	IH0044	Southwest China	Yunnan		25.6268	100.302	25.6268	100.302	25.6268	100.302	0.000183898	7.91513e-05	2.32337
45	Industrial Hotspot	IH0045	Southwest China	Yunnan		24.6068	98.7144	24.6068	98.7144	24.6068	98.7144	9.85819e-05	1.71383e-05	5.75213
46	Industrial Hotspot	IH0046	Southwest China	Yunnan		24.5219	97.7965	24.5219	97.7965	24.5219	97.7965	6.65598e-05	3.46524e-05	1.92078
47	Industrial Hotspot	IH0047	Southwest China	Yunnan		25.073	99.285	25.073	99.285	25.073	99.285	5.51603e-05	9.19783e-06	5.9971
48	Industrial Hotspot	IH0048	Southwest China	Yunnan		25.6406	104.29	25.6406	104.29	25.6406	104.29	0.000222488	0.000149604	1.48718
49	Industrial Park	IP0049	North China	Shanxi		35.6585	110.663	35.6477	110.621	35.6753	110.694	0.00127045	0.000679202	1.8705
50	Industrial Park	IP0050	North China	Shanxi		36.3987	113.02	36.3933	113.01	36.4047	113.027	0.0012413	0.000680137	1.82508
51	Industrial Park	IP0051	North China	Shanxi		35.6707	111.375	35.6632	111.368	35.6817	111.397	0.00134166	0.000292249	4.5908
52	Industrial Hotspot	IH0052	North China	Shanxi	Jincheng	35.6611	112.876	35.6468	112.867	35.6737	112.887	0.00142781	0.00103243	1.38296
53	Industrial Park	IP0053	North China	Shanxi		37.5796	112.185	37.5642	112.16	37.5963	112.2	0.00195237	0.000165351	11.8074
54	Industrial Park	IP0054	North China	Hebei		39.7819	118.155	39.7764	118.15	39.7867	118.161	0.00187065	0.000571829	3.27136
55	Industrial Park	IP0055	North China	Hebei		39.5274	118.292	39.5199	118.282	39.5328	118.3	0.00141012	0.00161471	0.8733
56	Industrial Park	IP0056	North China	Shanxi		38.3441	112.722	38.3343	112.709	38.351	112.73	0.000767884	0.000177354	4.32966
57	Industrial Park	IP0057	North China	Shanxi		38.0865	112.727	38.0802	112.718	38.0961	112.735	0.000736856	0.000143447	5.13678
58	Industrial Park	IP0058	North China	Ningxia		39.1499	106.628	39.1362	106.603	39.167	106.668	0.000655736	0.000282122	2.3243
59	Industrial Park	IP0059	North China	Inner Mongolia		38.3242	106.536	38.3134	106.527	38.3367	106.548	0.000428807	2.29722e-05	18.6664
60	Industrial Park	IP0060	North China	Shanxi		38.6923	111.512	38.6874	111.503	38.6973	111.52	0.000323771	2.02585e-05	15.982
61	Industrial Hotspot	IH0061	North China	Gansu		37.008	103.113	37.008	103.113	37.008	103.113	0.000335406	2.53137e-05	13.25
62	Industrial Park	IP0062	Northeast China	Heilongjiang		45.8116	130.898	45.7888	130.862	45.8376	130.936	0.000353747	0.000351835	1.00543
63	Industrial Hotspot	IH0063	North China	Shanxi		38.1049	112.727	38.1049	112.727	38.1049	112.727	0.000698983	0.000139841	4.99843
64	Industrial Park	IP0064	North China	Shandong		37.4119	118.871	37.4023	118.837	37.4338	118.896	0.00102883	2.23416e-05	46.0499
65	Industrial Park	IP0065	North China	Shanxi		36.1375	113.218	36.1289	113.209	36.1427	113.24	0.000707933	0.00125034	0.566192
66	Industrial Park	IP0066	North China	Hebei		36.6791	114.171	36.674	114.156	36.6845	114.184	0.00195807	0.00105849	1.84987
67	Industrial Park	IP0067	North China	Henan		36.1257	114.288	36.1144	114.271	36.1406	114.301	0.00142687	0.000576035	2.47705
68	Industrial Hotspot	IH0068	North China	Hebei		36.3607	114.172	36.3607	114.172	36.3607	114.172	0.00149416	0.000471072	3.17183
69	Industrial Park	IP0069	North China	Jiangsu		34.4218	119.778	34.4107	119.766	34.4304	119.788	0.000874292	2.27524e-05	38.4263
70	Industrial Park	IP0070	North China	Hebei		36.3082	114.282	36.3013	114.272	36.3156	114.292	0.00133831	0.000452213	2.95948
71	Industrial Park	IP0071	North China	Hebei		37.0423	114.458	37.0358	114.435	37.0487	114.474	0.00233558	0.000509277	4.58607
72	Industrial Hotspot	IH0072	North China	Hebei		36.5836	114.217	36.5836	114.217	36.5836	114.217	0.00182422	0.00105849	1.72342
73	Industrial Park	IP0073	North China	Jiangsu		34.4458	117.275	34.4367	117.259	34.454	117.285	0.00103093	0.000343588	3.00049
74	Industrial Park	IP0074	North China	Jiangsu		34.5322	117.395	34.5244	117.375	34.5413	117.414	0.000925275	0.000238255	3.88355
75	Industrial Park	IP0075	North China	Jiangsu		35.0948	119.267	35.088	119.25	35.1046	119.291	0.00114785	0.000175346	6.54623
76	Industrial Park	IP0076	North China	Shanxi		35.5865	111.258	35.5813	111.249	35.5908	111.267	0.0012079	0.000273854	4.41074
77	Industrial Hotspot	IH0077	North China	Shanxi		34.8341	111.181	34.8341	111.181	34.8341	111.181	0.000900917	0.000158305	5.69103
78	Industrial Hotspot	IH0078	North China	Shandong		34.8399	118.218	34.8399	118.218	34.8399	118.218	0.000941736	0.000197392	4.77089
79	Industrial Hotspot	IH0079	North China	Shanxi		35.3425	111.082	35.3425	111.082	35.3425	111.082	0.00102773	0.000101147	10.1608
80	Industrial Park	IP0080	North China	Shandong		36.5479	118.582	36.5381	118.568	36.5623	118.59	0.000892069	0.000391867	2.27646
81	Industrial Park	IP0081	North China	Shanxi		35.6944	111.431	35.6817	111.409	35.7033	111.46	0.00128564	0.000292249	4.39911
82	Industrial Park	IP0082	North China	Shandong		36.8611	117.615	36.8532	117.579	36.8714	117.633	0.00164157	0.00041452	3.96016
83	Industrial Park	IP0083	North China	Shandong		36.8978	117.781	36.8835	117.738	36.9207	117.802	0.00160477	0.00114272	1.40434
84	Industrial Park	IP0084	North China	Shandong		34.8622	117.444	34.8538	117.434	34.8696	117.455	0.00108229	0.000327376	3.30594
85	Industrial Park	IP0085	North China	Shandong		34.9569	117.022	34.9502	117.017	34.965	117.03	0.00121377	0.000534432	2.27114
86	Industrial Hotspot	IH0086	North China	Shandong		34.8546	117.677	34.8546	117.677	34.8546	117.677	0.000986937	0.000575578	1.71469
87	Industrial Park	IP0087	East China	Henan		32.4875	114.038	32.4737	114.029	32.5112	114.045	0.000954099	5.68599e-05	16.7798
88	Industrial Hotspot	IH0088	North China	Henan		34.1406	113.422	34.1406	113.422	34.1406	113.422	0.00136407	0.000318944	4.27684
89	Industrial Hotspot	IH0089	Southwest China	Yunnan		26.6379	101.427	26.6379	101.427	26.6379	101.427	0.000222763	2.46579e-05	9.03413
90	Industrial Hotspot	IH0090	Southwest China	Sichuan	Baihetan	27.2174	102.608	27.2174	102.608	27.2174	102.608	0.000109012	4.03e-06	27.0501
91	Industrial Hotspot	IH0091	Northwest China	Xinjiang		43.0086	90.1189	43.0086	90.1189	43.0086	90.1189	0.000185819	3.98049e-05	4.66825
92	Industrial Park	IP0092	Northwest China	Xinjiang		42.3339	86.3017	42.3246	86.2882	42.3437	86.3144	0.000135188	9.60259e-05	1.40782
93	Industrial Hotspot	IH0093	Southwest China	Yunnan		26.0896	101.683	26.0896	101.683	26.0896	101.683	0.000101438	7.03357e-06	14.422
94	Industrial Hotspot	IH0094	Southwest China	Yunnan		26.6695	100.196	26.6695	100.196	26.6695	100.196	8.44106e-05	3.60295e-05	2.34282
95	Industrial Hotspot	IH0095	Southwest China	Yunnan		24.9271	99.085	24.9271	99.085	24.9271	99.085	9.29988e-05	1.37288e-05	6.77401
96	Industrial Park	IP0096	East China	Hubei		30.6206	114.447	30.5942	114.422	30.6481	114.468	0.00165393	0.00285414	0.579486
97	Industrial Park	IP0097	North China	Hebei		36.5946	113.748	36.5831	113.736	36.6412	113.778	0.00123174	0.000247126	4.98425
98	Industrial Park	IP0098	North China	Shanxi		36.4519	113.045	36.4485	113.027	36.458	113.055	0.00117375	0.000692321	1.69538
99	Industrial Park	IP0099	North China	Hebei		37.1443	114.538	37.1378	114.531	37.1514	114.544	0.00214252	0.000534268	4.0102
100	Industrial Park	IP0100	North China	Shandong		35.348	115.984	35.3389	115.976	35.3592	116.002	0.000917125	0.000124712	7.35394
101	Industrial Park	IP0101	North China	Hebei		36.4993	114.211	36.4938	114.204	36.5049	114.225	0.00232685	0.000764781	3.04251
102	Industrial Hotspot	IH0102	North China	Hebei		39.8049	118.085	39.8049	118.085	39.8049	118.085	0.00165506	0.000571829	2.89432
103	Industrial Hotspot	IH0103	North China	Hebei		39.607	117.955	39.607	117.955	39.607	117.955	0.00139772	0.000128851	10.8475
104	Industrial Hotspot	IH0104	North China	Hebei		39.4355	118.463	39.4355	118.463	39.4355	118.463	0.00101401	0.000245393	4.13217
105	Industrial Hotspot	IH0105	North China	Shanxi		38.0086	113.344	38.0086	113.344	38.0086	113.344	0.00102725	0.000308185	3.33321
106	Industrial Park	IP0106	North China	Hebei		38.5662	114.946	38.5573	114.939	38.5767	114.957	0.00140759	0.000274225	5.13299
107	Industrial Hotspot	IH0107	North China	Shanxi		37.4886	111.134	37.4886	111.134	37.4886	111.134	0.000930824	0.00025077	3.71186
108	Industrial Park	IP0108	North China	Liaoning		41.143	122.98	41.1145	122.953	41.1884	123.022	0.00212658	0.00169189	1.25692
109	Industrial Park	IP0109	North China	Liaoning		40.6705	122.4	40.6575	122.376	40.6864	122.432	0.00157108	0.000922647	1.7028
110	Industrial Park	IP0110	North China	Liaoning		41.1889	122.821	41.1818	122.802	41.1918	122.855	0.00138394	0.00174204	0.794438
111	Industrial Park	IP0111	Northeast China	Inner Mongolia		43.0648	116.781	43.0549	116.759	43.075	116.798	0.000196741	8.49121e-06	23.17
112	Industrial Hotspot	IH0112	North China	Hebei		39.8798	117.704	39.8798	117.704	39.8798	117.704	0.00175455	0.000391735	4.47891
113	Industrial Park	IP0113	North China	Liaoning		40.3035	122.109	40.2879	122.034	40.3323	122.169	0.00123891	0.000140887	8.79366
114	Industrial Park	IP0114	North China	Gansu		37.0353	103.03	37.0261	103.011	37.0484	103.042	0.000340813	2.40216e-05	14.1878
115	Industrial Hotspot	IH0115	Southwest China	Yunnan		25.4679	100.545	25.4679	100.545	25.4679	100.545	0.000143479	5.08634e-05	2.82087
116	Industrial Park	IP0116	Southwest China	Yunnan		25.8018	99.1011	25.7917	99.0956	25.81	99.1087	8.79435e-05	1.25248e-05	7.02154
117	Industrial Park	IP0117	Southwest China	Guizhou		26.0089	104.52	26.0013	104.507	26.0143	104.531	0.000309113	0.000126145	2.45046
118	Industrial Hotspot	IH0118	Southwest China	Yunnan		24.6091	99.7238	24.6091	99.7238	24.6091	99.7238	8.69171e-05	5.55048e-06	15.6594
119	Industrial Park	IP0119	Southwest China	Yunnan		25.698	103.871	25.6894	103.862	25.7081	103.881	0.000313703	0.0003404	0.92157
120	Industrial Hotspot	IH0120	Southwest China	Yunnan	Mengsheng	23.3467	99.4097	23.3467	99.4097	23.3467	99.4097	0.000182363	6.94e-06	26.2771
121	Industrial Hotspot	IH0121	Northeast China	Heilongjiang		45.7932	131.205	45.7932	131.205	45.7932	131.205	0.000129914	0.000148663	0.87388
122	Industrial Park	IP0122	North China	Shandong		36.8186	116.739	36.808	116.726	36.8291	116.764	0.00164035	0.00028331	5.78993
123	Industrial Park	IP0123	North China	Hebei		39.8965	118.579	39.8755	118.531	39.912	118.595	0.00188145	0.00205602	0.915096
124	Industrial Park	IP0124	North China	Ningxia		38.1826	106.633	38.1587	106.561	38.213	106.703	0.000447495	0.000274817	1.62834
125	Industrial Park	IP0125	North China	Hebei		40.1843	118.068	40.1787	118.051	40.1905	118.086	0.00100716	0.000209346	4.81099
126	Industrial Park	IP0126	North China	Inner Mongolia		40.6058	109.67	40.595	109.628	40.6181	109.695	0.00136051	0.000485909	2.79992
127	Industrial Park	IP0127	Northeast China	Heilongjiang		46.605	131.085	46.5942	131.062	46.6193	131.104	0.000456215	0.000494474	0.922626
128	Industrial Park	IP0128	Northeast China	Liaoning	Beiying	41.2209	123.618	41.2072	123.591	41.2406	123.641	0.00166489	5.14e-05	32.3908
129	Industrial Park	IP0129	North China	Hebei	Nanbao	38.9854	118.501	38.9122	118.417	39.0521	118.588	0.00116641	0	#DIV/0!
130	Industrial Hotspot	IH0130	North China	Inner Mongolia		40.9223	113.901	40.9223	113.901	40.9223	113.901	0.000105826	0.000120323	0.879515
131	Industrial Park	IP0131	North China	Qinghai		37.0082	98.818	36.9984	98.795	37.0182	98.8426	5.68797e-05	1.15042e-06	49.4423
132	Industrial Hotspot	IH0132	Southwest China	Yunnan		25.6196	99.0954	25.6196	99.0954	25.6196	99.0954	5.34154e-05	2.03482e-05	2.62506
133	Industrial Park	IP0133	Southwest China	Yunnan	Yongbao	26.3476	100.635	26.3476	100.635	26.3476	100.635	8.57e-05	1.76e-05	4.86932
134	Industrial Park	IP0134	Southwest China	Yunnan		25.5472	100.594	25.5353	100.577	25.5567	100.617	0.000116159	3.26491e-05	3.55778
135	Industrial Park	IP0135	Southwest China	Yunnan		25.6664	100.332	25.6511	100.319	25.6743	100.345	6.13432e-05	7.91513e-05	0.775012
136	Industrial Park	IP0136	Southwest China	Sichuan		26.5687	101.676	26.5564	101.653	26.5826	101.698	0.000596659	0.000531116	1.12341
137	Industrial Hotspot	IH0137	Southwest China	Yunnan		24.6279	98.7635	24.6279	98.7635	24.6279	98.7635	9.55435e-05	8.01772e-06	11.9165
138	Industrial Hotspot	IH0138	Southwest China	Yunnan		25.1007	102.902	25.1007	102.902	25.1007	102.902	0.000310827	0.000121287	2.56274
139	Industrial Park	IP0139	Southwest China	Yunnan		25.7519	103.879	25.7381	103.869	25.7635	103.891	0.000229816	0.000182753	1.25753
140	Industrial Park	IP0140	Southwest China	Yunnan		25.3038	103.89	25.2892	103.87	25.3164	103.901	0.000259871	0.000180566	1.43921
141	Industrial Park	IP0141	Southwest China	Yunnan		25.4128	103.609	25.4045	103.596	25.4217	103.623	0.000356133	2.51538e-05	14.1582
142	Industrial Hotspot	IH0142	Southwest China	Yunnan		23.9004	99.6893	23.9004	99.6893	23.9004	99.6893	9.27916e-05	4.33746e-06	21.3931
143	Industrial Park	IP0143	North China	Hebei	Peijiafen	39.9572	118.556	39.9275	118.533	39.9893	118.589	0.00228745	0.00205602	1.11256
144	Industrial Hotspot	IH0144	North China	Liaoning		41.9721	124.392	41.9721	124.392	41.9721	124.392	0.000450914	4.22528e-05	10.6718
145	Industrial Park	IP0145	Southwest China	Guizhou		26.5964	104.883	26.5827	104.867	26.61	104.902	0.000328408	0.000526937	0.623239
146	Industrial Park	IP0146	North China	Gansu		40.319	99.084	40.312	99.0526	40.325	99.1036	8.41363e-05	9.35025e-07	89.983
147	Industrial Hotspot	IH0147	North China	Shandong		35.2785	115.973	35.2785	115.973	35.2785	115.973	0.000917935	0.000113355	8.09789
148	Industrial Park	IP0148	North China	Shandong		35.3287	116.816	35.3153	116.783	35.3531	116.824	0.00139479	0.000954663	1.46103
149	Industrial Park	IP0149	North China	Shandong		36.2153	117.622	36.2051	117.607	36.2278	117.64	0.00138671	0.00055172	2.51343
150	Industrial Hotspot	IH0150	North China	Inner Mongolia		39.7284	110.246	39.7284	110.246	39.7284	110.246	0.000586287	8.19905e-05	7.15067
151	Industrial Park	IP0151	North China	Shandong		37.1294	119.036	37.1159	119.004	37.1475	119.086	0.000801912	3.77838e-05	21.2237
152	Industrial Hotspot	IH0152	North China	Shanxi		38.0464	113.384	38.0464	113.384	38.0464	113.384	0.0010892	0.000359187	3.03239
153	Industrial Hotspot	IH0153	North China	Shaanxi		39.0487	110.255	39.0487	110.255	39.0487	110.255	0.000709878	9.5345e-05	7.44536
154	Industrial Park	IP0154	North China	Shanxi		35.4814	111.35	35.4738	111.343	35.4897	111.356	0.00111939	9.44114e-05	11.8565
155	Industrial Park	IP0155	North China	Shandong		35.1798	116.375	35.1745	116.362	35.1851	116.386	0.00101503	0.0001329	7.63754
156	Industrial Park	IP0156	North China	Shandong		35.447	115.998	35.4401	115.974	35.4548	116.02	0.00113109	0.000139314	8.119
157	Industrial Park	IP0157	North China	Shaanxi		35.6152	109.057	35.6025	109.043	35.6311	109.071	0.00034901	0.000110181	3.16759
158	Industrial Park	IP0158	Southwest China	Sichuan		31.1323	107.461	31.1149	107.452	31.1557	107.477	0.000668133	5.25237e-05	12.7206
159	Industrial Park	IP0159	Southwest China	Sichuan		31.1914	107.456	31.1871	107.445	31.1968	107.464	0.000588333	5.25237e-05	11.2013
160	Industrial Hotspot	IH0160	Southwest China	Sichuan		30.4754	106.871	30.4754	106.871	30.4754	106.871	0.00128087	0.000134696	9.50932
161	Industrial Park	IP0161	Southwest China	Chongqing		29.8324	107.608	29.8275	107.602	29.8381	107.614	0.000713927	8.93762e-05	7.98789
162	Industrial Hotspot	IH0162	Southwest China	Chongqing		30.1892	107.982	30.1892	107.982	30.1892	107.982	0.000574995	1.19033e-05	48.3056
163	Industrial Park	IP0163	Southwest China	Yunnan		26	104.27	25.9967	104.26	26.0056	104.283	0.000257656	2.22152e-05	11.5982
164	Industrial Hotspot	IH0164	Southwest China	Yunnan		25.6718	103.876	25.6718	103.876	25.6718	103.876	0.000181848	0.0003404	0.534218
165	Industrial Hotspot	IH0165	Southwest China	Sichuan		26.6151	101.472	26.6151	101.472	26.6151	101.472	0.000250956	2.46579e-05	10.1775
166	Industrial Hotspot	IH0166	Southwest China	Yunnan		25.3837	103.878	25.3837	103.878	25.3837	103.878	0.000219516	0.000180566	1.21571
167	Industrial Hotspot	IH0167	Southwest China	Yunnan		26.4617	103.332	26.4617	103.332	26.4617	103.332	0.000158324	7.16397e-05	2.21001
168	Industrial Park	IP0168	Southwest China	Yunnan		25.2311	102.539	25.2255	102.523	25.238	102.555	0.000181329	0.00155258	0.116792
169	Industrial Hotspot	IH0169	Southwest China	Yunnan		24.4387	98.494	24.4387	98.494	24.4387	98.494	0.000220097	8.47181e-06	25.9799
170	Industrial Hotspot	IH0170	Northwest China	Xinjiang		44.2831	85.1723	44.2831	85.1723	44.2831	85.1723	0.000456422	4.27483e-05	10.677
171	Industrial Park	IP0171	North China	Inner Mongolia		41.8878	114.058	41.8747	114.03	41.8997	114.079	0.00026535	0.000133512	1.98747
172	Industrial Hotspot	IH0172	Southwest China	Guizhou		26.6672	106.357	26.6672	106.357	26.6672	106.357	0.000187726	0.000161284	1.16395
173	Industrial Hotspot	IH0173	North China	Inner Mongolia		39.3853	110.67	39.3853	110.67	39.3853	110.67	0.000498927	6.50101e-05	7.6746
174	Industrial Park	IP0174	North China	Inner Mongolia		40.6885	110.211	40.6825	110.178	40.6973	110.239	0.000731948	0.00162777	0.449663
175	Industrial Park	IP0175	North China	Hebei		40.5891	115.09	40.5746	115.063	40.6034	115.112	0.00122623	0.000459756	2.66713
176	Industrial Hotspot	IH0176	North China	Hebei		39.4544	118.455	39.4544	118.455	39.4544	118.455	0.000908316	0.000245393	3.70147
177	Industrial Park	IP0177	North China	Shandong		36.216	115.838	36.2087	115.83	36.2239	115.848	0.00115992	0.000282128	4.11133
178	Industrial Park	IP0178	North China	Shandong		36.2285	116.533	36.2216	116.514	36.2366	116.546	0.00124058	0.000335548	3.69719
179	Industrial Park	IP0179	North China	Shanxi		37.9283	112.54	37.904	112.523	37.9496	112.555	0.00137126	0.00430493	0.318534
180	Industrial Hotspot	IH0180	North China	Shaanxi		34.6198	108.558	34.6198	108.558	34.6198	108.558	0.00111591	4.59882e-05	24.2652
181	Industrial Hotspot	IH0181	Southwest China	Yunnan		27.4419	103.794	27.4419	103.794	27.4419	103.794	0.000160536	2.42967e-05	6.60733
182	Industrial Hotspot	IH0182	Southwest China	Yunnan		26.9427	102.928	26.9427	102.928	26.9427	102.928	5.29686e-05	2.09724e-05	2.52563
183	Industrial Park	IP0183	Southwest China	Sichuan		26.4994	101.851	26.4754	101.832	26.5222	101.865	0.00013264	7.79867e-05	1.7008
184	Industrial Hotspot	IH0184	South China	Hainan		19.2364	108.943	19.2364	108.943	19.2364	108.943	0.000182448	4.77509e-05	3.82083
185	Industrial Park	IP0185	North China	Shaanxi		35.5519	110.48	35.5378	110.468	35.5717	110.491	0.00110764	8.50558e-05	13.0226
186	Industrial Park	IP0186	North China	Shaanxi		34.8804	109	34.873	108.989	34.891	109.006	0.00100174	8.16263e-05	12.2723
187	Industrial Hotspot	IH0187	Southwest China	Sichuan		32.6144	105.861	32.6144	105.861	32.6144	105.861	0.000244529	1.04279e-05	23.4495
188	Industrial Park	IP0188	North China	Ningxia		38.2499	106.548	38.2368	106.532	38.2643	106.56	0.000532769	0.000190869	2.79128
189	Industrial Hotspot	IH0189	North China	Inner Mongolia		42.3963	112.906	42.3963	112.906	42.3963	112.906	0.000127089	9.16469e-06	13.8672
190	Industrial Park	IP0190	Northwest China	Xinjiang		41.8286	81.7585	41.8173	81.7186	41.8463	81.7943	0.000237821	4.45905e-05	5.33343
191	Industrial Park	IP0191	North China	Inner Mongolia		42.2576	119.238	42.2449	119.207	42.2737	119.256	0.000306173	0.00014278	2.14437
192	Industrial Park	IP0192	North China	Hebei		39.6562	118.898	39.6428	118.882	39.6686	118.911	0.00121492	0.000143343	8.4756
193	Industrial Park	IP0193	North China	Hebei		39.7507	118.817	39.7459	118.793	39.763	118.829	0.00114084	0.000338994	3.36538
194	Industrial Park	IP0194	North China	Hebei		39.6042	118.361	39.592	118.347	39.6151	118.378	0.00111838	0.00161471	0.69262
195	Industrial Park	IP0195	North China	Hebei		38.4631	117.609	38.4475	117.593	38.4776	117.625	0.000902638	1.20067e-05	75.1779
196	Industrial Hotspot	IH0196	North China	Shanxi		37.8474	111.979	37.8474	111.979	37.8474	111.979	0.000936562	7.10774e-06	131.767
197	Industrial Park	IP0197	North China	Henan		36.2711	114.087	36.264	114.076	36.2784	114.1	0.00146371	0.000471072	3.10719
198	Industrial Park	IP0198	North China	Hebei		36.6011	114.434	36.59	114.407	36.6106	114.462	0.00188189	0.00135255	1.39136
199	Industrial Park	IP0199	North China	Shandong		35.1914	118.796	35.1805	118.784	35.2044	118.815	0.00111004	0.00017356	6.39572
200	Industrial Park	IP0200	North China	Shandong		35.1822	119.036	35.1643	119.03	35.2043	119.043	0.000862006	0.000111099	7.7589
201	Industrial Hotspot	IH0201	North China	Shandong		37.2706	118.258	37.2706	118.258	37.2706	118.258	0.00103648	0.00107874	0.960823
202	Industrial Hotspot	IH0202	North China	Shandong		35.7784	118.136	35.7784	118.136	35.7784	118.136	0.000718121	1.57563e-05	45.5768
203	Industrial Park	IP0203	North China	Shandong		36.3051	117.539	36.2958	117.526	36.3168	117.55	0.00157063	0.000124394	12.6262
204	Industrial Park	IP0204	North China	Hebei		36.5877	114.099	36.58	114.09	36.5993	114.112	0.00210158	0.00105849	1.98545
205	Industrial Park	IP0205	North China	Hebei		36.6219	114.129	36.6102	114.117	36.6312	114.141	0.00197724	0.00105849	1.86798
206	Industrial Park	IP0206	North China	Henan		35.0507	112.532	35.0437	112.522	35.0595	112.545	0.00151366	0.00052781	2.86782
207	Industrial Hotspot	IH0207	North China	Henan		34.0012	112.965	34.0012	112.965	34.0012	112.965	0.00104954	0.000152346	6.88917
208	Industrial Hotspot	IH0208	East China	Hubei		30.9543	113.181	30.9543	113.181	30.9543	113.181	0.00078147	2.77196e-05	28.1919
209	Industrial Hotspot	IH0209	East China	Hunan		29.5084	113.408	29.5084	113.408	29.5084	113.408	0.000914193	6.07277e-05	15.054
210	Industrial Hotspot	IH0210	East China	Hubei		31.2744	112.273	31.2744	112.273	31.2744	112.273	0.000767861	4.20262e-05	18.271
211	Industrial Hotspot	IH0211	Northwest China	Xinjiang		43.1363	92.7117	43.1363	92.7117	43.1363	92.7117	0.000130636	5.17249e-06	25.256
212	Industrial Park	IP0212	North China	Hebei		40.112	118.739	40.1051	118.722	40.1183	118.763	0.00109178	0.00131694	0.829024
213	Industrial Park	IP0213	North China	Shanxi		37.5895	112.315	37.5765	112.294	37.601	112.341	0.000791854	0.000385263	2.05536
214	Industrial Park	IP0214	South China	Fujian		23.7961	117.625	23.7841	117.612	23.81	117.639	0.000231186	5.25769e-05	4.39711
215	Industrial Hotspot	IH0215	Northeast China	Heilongjiang		47.2292	130.193	47.2292	130.193	47.2292	130.193	0.00041604	3.0945e-05	13.4445
216	Industrial Park	IP0216	North China	Shandong		35.5039	116.747	35.4957	116.741	35.5094	116.753	0.00117155	0.000890127	1.31616
217	Industrial Park	IP0217	North China	Hebei		36.715	114.214	36.7055	114.197	36.725	114.228	0.00221189	0.00105849	2.08966
218	Industrial Park	IP0218	North China	Hebei		36.7236	114.109	36.699	114.08	36.7527	114.124	0.00228603	0.00100539	2.27378
219	Industrial Park	IP0219	North China	Henan		36.1425	114.145	36.1359	114.132	36.1496	114.156	0.00129912	0.000182242	7.12854
220	Industrial Hotspot	IH0220	North China	Hebei		36.4351	114.181	36.4351	114.181	36.4351	114.181	0.00179095	0.000471072	3.80186
221	Industrial Park	IP0221	North China	Shandong		36.9427	117.625	36.9344	117.62	36.951	117.634	0.00184231	0.00041452	4.44445
222	Industrial Park	IP0222	North China	Hebei		39.6636	118.406	39.6503	118.374	39.6889	118.441	0.00166373	0.00161471	1.03036
223	Industrial Park	IP0223	North China	Hebei		39.6046	118.476	39.5875	118.458	39.6235	118.496	0.000977523	0.00153056	0.638669
224	Industrial Park	IP0224	North China	Liaoning		41.5532	121.295	41.5489	121.282	41.5585	121.308	0.000538752	0.000103795	5.19051
225	Industrial Park	IP0225	North China	Liaoning		41.2707	119.413	41.26	119.398	41.2824	119.43	0.000472512	7.7397e-05	6.10504
226	Industrial Park	IP0226	North China	Shandong		36.7139	118.924	36.7083	118.909	36.7194	118.937	0.000830047	0.0002775	2.99116
227	Industrial Hotspot	IH0227	North China	Shanxi		35.91	111.404	35.91	111.404	35.91	111.404	0.000967675	0.00025764	3.75592
228	Industrial Hotspot	IH0228	North China	Gansu		36.2329	103.583	36.2329	103.583	36.2329	103.583	0.000503776	0.00104424	0.482432
229	Industrial Hotspot	IH0229	Southwest China	Yunnan		25.3835	99.3083	25.3835	99.3083	25.3835	99.3083	8.79171e-05	4.99492e-06	17.6013
230	Industrial Hotspot	IH0230	Northwest China	Xinjiang		43.1672	92.4662	43.1672	92.4662	43.1672	92.4662	0.000107016	9.68966e-07	110.443
231	Industrial Park	IP0231	North China	Liaoning		41.1967	122.929	41.1896	122.917	41.2032	122.939	0.00229286	0.00174204	1.31619
232	Industrial Park	IP0232	Southwest China	Sichuan		29.5019	103.483	29.4949	103.465	29.5095	103.499	0.00085715	5.43407e-05	15.7736
233	Industrial Hotspot	IH0233	Southwest China	Sichuan		31.0016	103.781	31.0016	103.781	31.0016	103.781	0.000751082	0.000258383	2.90686
234	Industrial Hotspot	IH0234	North China	Shanxi		36.6695	112.323	36.6695	112.323	36.6695	112.323	0.000613019	5.67684e-05	10.7986
235	Industrial Park	IP0235	North China	Tianjin		38.7152	117.534	38.6832	117.504	38.7554	117.567	0.00119481	6.08338e-05	19.6405
236	Industrial Park	IP0236	North China	Tianjin		38.8308	117.103	38.8174	117.081	38.8429	117.12	0.00114705	7.27142e-05	15.7747
237	Industrial Park	IP0237	North China	Inner Mongolia		39.3677	106.979	39.335	106.952	39.4027	107.007	0.000315653	0.000754858	0.418162
238	Industrial Park	IP0238	North China	Hebei		36.732	114.515	36.7276	114.509	36.7375	114.522	0.00147973	0.000501924	2.94811
239	Industrial Hotspot	IH0239	North China	Hebei		36.537	114.222	36.537	114.222	36.537	114.222	0.00205056	0.00105849	1.93725
240	Industrial Park	IP0240	North China	Hebei		36.6373	113.984	36.6269	113.973	36.6468	113.993	0.00142155	0.000279777	5.08102
241	Industrial Park	IP0241	North China	Shanxi		36.3349	111.758	36.3275	111.747	36.3443	111.768	0.000726352	0.000166426	4.36441
242	Industrial Park	IP0242	North China	Henan		36.2417	114.062	36.2351	114.054	36.247	114.068	0.00143534	0.000278519	5.15349
243	Industrial Hotspot	IH0243	North China	Shanxi		37.7794	111.211	37.7794	111.211	37.7794	111.211	0.000505959	8.61405e-05	5.87365
244	Industrial Hotspot	IH0244	North China	Shanxi		36.9766	111.472	36.9766	111.472	36.9766	111.472	0.0010537	5.61525e-05	18.765
245	Industrial Hotspot	IH0245	North China	Shanxi		35.3246	111.628	35.3246	111.628	35.3246	111.628	0.000911301	0.000145274	6.27297
246	Industrial Park	IP0246	North China	Shaanxi		34.4676	107.237	34.4622	107.231	34.4746	107.243	0.000673511	0.000652231	1.03263
247	Industrial Hotspot	IH0247	East China	Henan		31.9496	114.631	31.9496	114.631	31.9496	114.631	0.00100458	1.74318e-05	57.6291
248	Industrial Hotspot	IH0248	North China	Shaanxi		34.6103	108.63	34.6103	108.63	34.6103	108.63	0.00114607	4.59882e-05	24.9209
249	Industrial Hotspot	IH0249	North China	Shaanxi		34.8207	109.042	34.8207	109.042	34.8207	109.042	0.00102522	7.07745e-05	14.4857
250	Industrial Hotspot	IH0250	East China	Chongqing		30.7442	108.435	30.7442	108.435	30.7442	108.435	0.000394497	8.14713e-05	4.84216
251	Industrial Park	IP0251	Southwest China	Chongqing		29.8289	106.974	29.8146	106.961	29.8466	106.988	0.000934271	0.000129413	7.21931
252	Industrial Hotspot	IH0252	Southwest China	Chongqing		30.5066	107.454	30.5066	107.454	30.5066	107.454	0.000620677	3.32305e-05	18.678
253	Industrial Park	IP0253	Southwest China	Chongqing		29.7918	107.047	29.7747	107.025	29.8113	107.067	0.00121362	0.000259584	4.67524
254	Industrial Park	IP0254	Southwest China	Sichuan		29.7311	104.5	29.7209	104.483	29.7421	104.52	0.000907856	0.000124666	7.28231
255	Industrial Hotspot	IH0255	Southwest China	Sichuan		30.189	106.826	30.189	106.826	30.189	106.826	0.00100336	3.00023e-05	33.4428
256	Industrial Hotspot	IH0256	Southwest China	Sichuan		29.7863	104.578	29.7863	104.578	29.7863	104.578	0.000873446	3.06958e-05	28.4549
257	Industrial Hotspot	IH0257	East China	Hunan		29.5874	111.28	29.5874	111.28	29.5874	111.28	0.000596219	8.51281e-05	7.00379
258	Industrial Hotspot	IH0258	Southwest China	Sichuan		26.6395	102.611	26.6395	102.611	26.6395	102.611	9.24212e-05	4.35787e-05	2.12079
259	Industrial Park	IP0259	South China	Guangdong		22.7501	114.6	22.7282	114.562	22.7758	114.643	0.00103188	8.0758e-05	12.7775
260	Industrial Hotspot	IH0260	South China	Guangdong		23.5717	114.299	23.5717	114.299	23.5717	114.299	0.00043471	4.53079e-05	9.59456
261	Industrial Hotspot	IH0261	Southwest China	Sichuan		26.4428	101.867	26.4428	101.867	26.4428	101.867	0.000180769	2.1005e-05	8.60602
262	Industrial Hotspot	IH0262	North China	Shanxi		36.8564	111.826	36.8564	111.826	36.8564	111.826	0.00106608	0.000496984	2.14511
263	Industrial Hotspot	IH0263	North China	Shanxi		36.0346	110.948	36.0346	110.948	36.0346	110.948	0.000526239	2.65944e-05	19.7876
264	Industrial Park	IP0264	North China	Ningxia		39.2882	106.763	39.2452	106.712	39.3227	106.8	0.000626916	0.000727198	0.862099
265	Industrial Park	IP0265	North China	Liaoning		41.2755	123.714	41.26	123.668	41.2967	123.751	0.00159157	0.00076209	2.08843
266	Industrial Hotspot	IH0266	North China	Hebei		39.9176	118.367	39.9176	118.367	39.9176	118.367	0.001834	0.000471839	3.88692
267	Industrial Park	IP0267	North China	Hebei		40.5163	117.602	40.5053	117.586	40.5265	117.614	0.000686072	5.31074e-05	12.9186
268	Industrial Hotspot	IH0268	North China	Beijing		40.1864	116.167	40.1864	116.167	40.1864	116.167	0.00192165	0.000261646	7.34448
269	Industrial Hotspot	IH0269	North China	Shanxi		37.8609	112.045	37.8609	112.045	37.8609	112.045	0.000951436	5.685e-05	16.7359
270	Industrial Hotspot	IH0270	North China	Hebei		36.7375	114.235	36.7375	114.235	36.7375	114.235	0.00220503	0.000978001	2.25463
271	Industrial Park	IP0271	North China	Shandong		36.0906	117.82	36.0684	117.792	36.1178	117.848	0.00131545	0.000198341	6.63224
272	Industrial Hotspot	IH0272	North China	Shanxi		36.3578	112.924	36.3578	112.924	36.3578	112.924	0.00105724	0.000363364	2.9096
273	Industrial Hotspot	IH0273	North China	Shanxi		36.3851	112.183	36.3851	112.183	36.3851	112.183	0.000714943	3.46979e-05	20.6048
274	Industrial Hotspot	IH0274	North China	Shanxi		36.7538	112.249	36.7538	112.249	36.7538	112.249	0.000656074	3.38978e-05	19.3545
275	Industrial Park	IP0275	North China	Shanxi		36.7114	111.7	36.705	111.692	36.7181	111.709	0.00108577	0.000337888	3.21339
276	Industrial Hotspot	IH0276	North China	Shanxi		37.1661	112.159	37.1661	112.159	37.1661	112.159	0.00112569	0.000317071	3.55028
277	Industrial Hotspot	IH0277	North China	Shandong		37.1937	116.832	37.1937	116.832	37.1937	116.832	0.00125739	0.000251731	4.99497
278	Industrial Hotspot	IH0278	North China	Hebei		38.8607	114.831	38.8607	114.831	38.8607	114.831	0.00130276	1.55199e-05	83.9412
279	Industrial Hotspot	IH0279	North China	Shanxi		37.8885	113.666	37.8885	113.666	37.8885	113.666	0.00125258	0.00135262	0.926037
280	Industrial Park	IP0280	North China	Hebei		36.7118	113.92	36.6878	113.901	36.739	113.935	0.00213633	0.000224154	9.53061
281	Industrial Hotspot	IH0281	North China	Shanxi		37.8464	112.108	37.8464	112.108	37.8464	112.108	0.000829841	5.685e-05	14.597
282	Industrial Park	IP0282	North China	Hebei		36.668	114.11	36.655	114.103	36.6756	114.121	0.00211226	0.00105849	1.99554
283	Industrial Hotspot	IH0283	North China	Shaanxi		33.8285	110.015	33.8285	110.015	33.8285	110.015	0.000547243	1.19084e-05	45.9544
284	Industrial Hotspot	IH0284	North China	Henan		34.7842	111.922	34.7842	111.922	34.7842	111.922	0.00109696	0.000159098	6.89486
285	Industrial Hotspot	IH0285	North China	Henan		34.0555	112.891	34.0555	112.891	34.0555	112.891	0.00121081	0.00021366	5.66696
286	Industrial Park	IP0286	North China	Jiangsu		34.384	119.788	34.377	119.777	34.3914	119.798	0.000660537	2.27524e-05	29.0315
287	Industrial Hotspot	IH0287	North China	Henan		34.3223	113.337	34.3223	113.337	34.3223	113.337	0.00137954	0.000128748	10.715
288	Industrial Hotspot	IH0288	North China	Shanxi		35.2269	111.69	35.2269	111.69	35.2269	111.69	0.000849244	5.83165e-06	145.627
289	Industrial Park	IP0289	North China	Henan		35.0846	112.553	35.0783	112.54	35.0911	112.564	0.00171937	0.00052781	3.25755
290	Industrial Hotspot	IH0290	North China	Shanxi		35.5842	110.805	35.5842	110.805	35.5842	110.805	0.00106787	0.000238431	4.47873
291	Industrial Park	IP0291	North China	Shanxi		35.6665	110.983	35.6513	110.958	35.6735	111.032	0.00121864	0.000225065	5.4146
292	Industrial Hotspot	IH0292	East China	Anhui		31.1361	118.171	31.1361	118.171	31.1361	118.171	0.0010471	0.0002569	4.0759
293	Industrial Hotspot	IH0293	Southwest China	Sichuan		32.3082	106.819	32.3082	106.819	32.3082	106.819	0.000325213	6.17658e-06	52.6526
294	Industrial Hotspot	IH0294	Southwest China	Sichuan		32.4056	106.77	32.4056	106.77	32.4056	106.77	0.000272564	6.18085e-06	44.0982
295	Industrial Park	IP0295	Southwest China	Sichuan		31.0365	103.669	31.0216	103.65	31.0555	103.683	0.000545095	4.96421e-05	10.9805
296	Industrial Hotspot	IH0296	Southwest China	Yunnan		25.4167	104.311	25.4167	104.311	25.4167	104.311	0.00013391	1.14995e-05	11.6448
297	Industrial Park	IP0297	Southwest China	Guangxi		23.2645	106.374	23.2518	106.365	23.2779	106.393	0.000149576	1.87328e-05	7.98473
298	Industrial Park	IP0298	South China	Guangdong		21.0478	110.471	21.0165	110.432	21.0755	110.534	0.000310132	0.000161901	1.91556
299	Industrial Hotspot	IH0299	South China	Hainan		19.241	109.017	19.241	109.017	19.241	109.017	0.000167853	1.63997e-05	10.2351
300	Industrial Park	IP0300	South China	Guangxi		21.5169	109.505	21.5095	109.495	21.5305	109.517	0.000325383	3.97576e-05	8.18418
301	Industrial Park	IP0301	Northeast China	Heilongjiang		45.7658	130.568	45.7597	130.557	45.7741	130.585	0.000298178	5.07117e-05	5.87986
302	Industrial Park	IP0302	North China	Henan		34.0818	112.811	34.0761	112.801	34.0942	112.83	0.00137265	0.00021366	6.42446
303	Industrial Hotspot	IH0303	North China	Henan		36.0232	113.763	36.0232	113.763	36.0232	113.763	0.00144923	0.000289172	5.01165
304	Industrial Hotspot	IH0304	North China	Shanxi		35.8999	111.329	35.8999	111.329	35.8999	111.329	0.00121379	0.00025764	4.7112
305	Industrial Hotspot	IH0305	North China	Shanxi		36.8777	111.418	36.8777	111.418	36.8777	111.418	0.00109258	5.61525e-05	19.4574
306	Industrial Hotspot	IH0306	North China	Shanxi		36.3383	111.97	36.3383	111.97	36.3383	111.97	0.000691152	9.93772e-05	6.95483
307	Industrial Park	IP0307	North China	Shanxi		36.7997	111.292	36.7901	111.285	36.8071	111.305	0.000679265	5.61525e-05	12.0968
308	Industrial Park	IP0308	North China	Shanxi		37.081	111.982	37.0624	111.96	37.1114	112.006	0.0013707	0.00124978	1.09676
309	Industrial Park	IP0309	North China	Inner Mongolia		41.3018	108.57	41.291	108.557	41.3109	108.591	0.00024245	1.07425e-05	22.5693
310	Industrial Hotspot	IH0310	North China	Shanxi		39.5133	111.779	39.5133	111.779	39.5133	111.779	0.000302436	9.73409e-06	31.0698
311	Industrial Park	IP0311	North China	Inner Mongolia		41.5314	113.586	41.5246	113.563	41.5487	113.625	0.000232856	0.000133289	1.747
312	Industrial Park	IP0312	North China	Shanxi		37.4732	111.169	37.4636	111.154	37.4853	111.183	0.000863765	0.000256331	3.36972
313	Industrial Hotspot	IH0313	East China	Jiangsu		32.1671	119.071	32.1671	119.071	32.1671	119.071	0.00104675	9.55007e-05	10.9607
314	Industrial Park	IP0314	East China	Jiangsu		31.9483	120.325	31.9401	120.313	31.9569	120.337	0.00142159	0.00177681	0.800081
315	Industrial Park	IP0315	East China	Jiangsu		32.7921	120.375	32.7797	120.365	32.8067	120.382	0.000721784	0.000237562	3.0383
316	Industrial Hotspot	IH0316	East China	Jiangsu		32.1479	119.326	32.1479	119.326	32.1479	119.326	0.00108187	0.000724924	1.4924
317	Industrial Hotspot	IH0317	East China	Jiangsu		32.334	119.735	32.334	119.735	32.334	119.735	0.00122451	0.00047236	2.59233
318	Industrial Park	IP0318	East China	Jiangsu		32.1925	118.742	32.167	118.713	32.2242	118.77	0.00131175	0.00148324	0.884386
319	Industrial Hotspot	IH0319	East China	Zhejiang		30.7226	119.701	30.7226	119.701	30.7226	119.701	0.00140538	9.70834e-05	14.476
320	Industrial Hotspot	IH0320	East China	Anhui		31.5204	117.899	31.5204	117.899	31.5204	117.899	0.00108962	0.000166683	6.53709
321	Industrial Hotspot	IH0321	East China	Anhui		32.1886	118.209	32.1886	118.209	32.1886	118.209	0.00100756	2.57966e-05	39.0577
322	Industrial Park	IP0322	East China	Jiangsu		31.3208	119.645	31.3152	119.639	31.3277	119.652	0.000867143	0.000314072	2.76097
323	Industrial Hotspot	IH0323	East China	Anhui		31.4763	117.928	31.4763	117.928	31.4763	117.928	0.0013262	0.000196524	6.74825
324	Industrial Hotspot	IH0324	East China	Anhui		31.099	118.026	31.099	118.026	31.099	118.026	0.000791482	0.0002569	3.0809
325	Industrial Park	IP0325	East China	Shanghai		31.4351	121.437	31.4094	121.403	31.4652	121.471	0.00132432	0.00195055	0.678948
326	Industrial Park	IP0326	East China	Jiangsu		31.6943	120.069	31.6824	120.049	31.7143	120.09	0.00174974	0.000363204	4.81753
327	Industrial Park	IP0327	East China	Jiangsu		31.3851	119.301	31.3807	119.292	31.3946	119.316	0.00109063	0.000273709	3.98463
328	Industrial Hotspot	IH0328	East China	Anhui		31.6642	117.838	31.6642	117.838	31.6642	117.838	0.00110172	0.000166683	6.60966
329	Industrial Park	IP0329	East China	Anhui		31.6475	117.868	31.6399	117.858	31.6569	117.877	0.000812368	0.000166683	4.87374
330	Industrial Park	IP0330	East China	Anhui		31.7459	118.49	31.7277	118.457	31.7724	118.526	0.00134771	0.000332279	4.05596
331	Industrial Hotspot	IH0331	East China	Anhui		31.0309	119.559	31.0309	119.559	31.0309	119.559	0.00107929	6.06447e-05	17.7969
332	Industrial Hotspot	IH0332	East China	Anhui		31.2309	118.381	31.2309	118.381	31.2309	118.381	0.000916934	8.60647e-05	10.654
333	Industrial Hotspot	IH0333	East China	Zhejiang		30.9355	119.946	30.9355	119.946	30.9355	119.946	0.00122355	0.000138506	8.83388
334	Industrial Hotspot	IH0334	East China	Anhui		31.9667	118.341	31.9667	118.341	31.9667	118.341	0.00104613	5.96906e-05	17.5259
335	Industrial Park	IP0335	East China	Jiangsu		31.4713	119.482	31.4656	119.469	31.4769	119.492	0.00143317	0.00027483	5.21476
336	Industrial Park	IP0336	Southwest China	Yunnan		26.1706	103.13	26.1547	103.121	26.1872	103.137	0.00017563	4.85299e-05	3.619
337	Industrial Park	IP0337	Northwest China	Xinjiang		44.3333	87.6729	44.3172	87.6509	44.3617	87.7116	0.000798054	0.000238821	3.34164
338	Industrial Park	IP0338	Southwest China	Yunnan		25.6589	104.044	25.6457	104.023	25.6682	104.073	0.000271541	3.56775e-05	7.61098
339	Industrial Park	IP0339	North China	Inner Mongolia		39.0772	109.475	39.0617	109.469	39.0943	109.482	0.000375603	5.29374e-05	7.09524
340	Industrial Park	IP0340	North China	Hebei		39.8036	118.206	39.7976	118.195	39.8108	118.217	0.00223979	0.000571829	3.91689
341	Industrial Park	IP0341	North China	Hebei		37.5877	114.456	37.5779	114.448	37.6018	114.467	0.00175367	0.000219749	7.9803
342	Industrial Park	IP0342	North China	Hebei		37.9742	114.867	37.9682	114.855	37.9801	114.879	0.00146358	0.000481206	3.04149
343	Industrial Hotspot	IH0343	North China	Hebei		39.463	118.117	39.463	118.117	39.463	118.117	0.00100382	0.000144514	6.94621
344	Industrial Hotspot	IH0344	North China	Hebei		39.9205	118.227	39.9205	118.227	39.9205	118.227	0.00169211	0.000568125	2.97842
345	Industrial Hotspot	IH0345	North China	Hebei		39.4123	118.262	39.4123	118.262	39.4123	118.262	0.000993782	0.000225778	4.4016
346	Industrial Hotspot	IH0346	North China	Shanxi		36.5544	112.247	36.5544	112.247	36.5544	112.247	0.000562497	6.06479e-05	9.27479
347	Industrial Hotspot	IH0347	North China	Shanxi		36.424	112.341	36.424	112.341	36.424	112.341	0.000551877	4.51163e-05	12.2323
348	Industrial Park	IP0348	North China	Shandong		34.9075	118.298	34.9027	118.287	34.9187	118.308	0.000869898	0.000430688	2.01978
349	Industrial Park	IP0349	North China	Henan		34.2972	112.55	34.2791	112.535	34.3137	112.578	0.0012094	0.000119203	10.1457
350	Industrial Park	IP0350	North China	Shandong		35.6356	118.823	35.6323	118.811	35.6405	118.835	0.000949243	0.000197851	4.79776
351	Industrial Hotspot	IH0351	North China	Anhui		33.97	117.114	33.97	117.114	33.97	117.114	0.000818994	5.92094e-05	13.8321
352	Industrial Park	IP0352	South China	Guangdong		23.3373	113.145	23.3273	113.136	23.3459	113.153	0.000838492	0.000391753	2.14036
353	Industrial Park	IP0353	South China	Guangdong		21.6457	110.155	21.6379	110.148	21.6581	110.171	0.000276145	2.23439e-05	12.3589
354	Industrial Park	IP0354	North China	Jiangsu		34.7348	116.624	34.7238	116.613	34.7454	116.632	0.00115374	0.000145018	7.95583
355	Industrial Park	IP0355	North China	Hebei	Zhongluan	40.948	117.712	40.9303	117.688	40.968	117.737	0.00133752	0.000166736	8.02178
356	Industrial Park	IP0356	North China	Jiangsu		34.9461	116.798	34.9357	116.779	34.9603	116.812	0.00142253	0.0002199	6.46898
357	Industrial Park	IP0357	North China	Ningxia		37.5877	105.685	37.5578	105.658	37.6188	105.715	0.000333735	0.000224207	1.48851
358	Industrial Hotspot	IH0358	North China	Qinghai		36.1217	102.218	36.1217	102.218	36.1217	102.218	0.000134978	1.8406e-05	7.33336
359	Industrial Park	IP0359	North China	Shanxi		35.6375	110.72	35.628	110.709	35.6544	110.745	0.00102925	0.000649818	1.58391
360	Industrial Park	IP0360	North China	Jilin		41.7803	126.018	41.7699	126.004	41.7915	126.036	0.000822878	0.000285257	2.88469
361	Industrial Park	IP0361	North China	Liaoning		38.9753	121.652	38.9623	121.636	38.9853	121.666	0.000696744	0.00452047	0.154131
362	Industrial Park	IP0362	North China	Liaoning		38.9974	121.543	38.9854	121.522	39.0125	121.565	0.000994735	0.00229806	0.432859
363	Industrial Hotspot	IH0363	North China	Hebei		40.081	119.598	40.081	119.598	40.081	119.598	0.000765037	0.000100416	7.61869
364	Industrial Hotspot	IH0364	North China	Jiangsu		34.4146	117.251	34.4146	117.251	34.4146	117.251	0.00109941	0.0010962	1.00292
365	Industrial Park	IP0365	East China	Anhui		30.4496	117.237	30.4415	117.233	30.4588	117.247	0.000974779	5.92308e-05	16.4573
366	Industrial Hotspot	IH0366	East China	Anhui		30.7442	117.393	30.7442	117.393	30.7442	117.393	0.000722925	0.000134879	5.3598
367	Industrial Park	IP0367	East China	Jiangsu		32.8357	119.43	32.8266	119.421	32.8469	119.439	0.000837907	0.000183923	4.55575
368	Industrial Hotspot	IH0368	East China	Zhejiang		31.1086	119.722	31.1086	119.722	31.1086	119.722	0.00132092	6.06447e-05	21.7813
369	Industrial Park	IP0369	East China	Jiangsu		31.4007	120.474	31.3957	120.467	31.412	120.484	0.00189584	0.000324079	5.84992
370	Industrial Park	IP0370	East China	Jiangsu		31.9767	120.628	31.9609	120.604	31.992	120.685	0.00123038	0.00132966	0.925335
371	Industrial Park	IP0371	East China	Anhui		30.989	117.788	30.9771	117.772	31.0094	117.808	0.00132988	0.000663358	2.00477
372	Industrial Hotspot	IH0372	East China	Anhui		30.8436	117.779	30.8436	117.779	30.8436	117.779	0.000937118	0.000876802	1.06879
373	Industrial Park	IP0373	East China	Anhui		32.5851	117.255	32.5727	117.243	32.5977	117.273	0.00066822	0.000120338	5.55285
374	Industrial Hotspot	IH0374	East China	Anhui		31.5187	117.752	31.5187	117.752	31.5187	117.752	0.000917066	0.000103069	8.8976
375	Industrial Hotspot	IH0375	East China	Jiangsu		31.9701	118.97	31.9701	118.97	31.9701	118.97	0.00105326	0.000295566	3.56353
376	Industrial Park	IP0376	North China	Shaanxi		33.1331	106.663	33.1259	106.65	33.1405	106.688	0.000296931	6.18936e-05	4.79744
377	Industrial Hotspot	IH0377	Southwest China	Sichuan		31.8668	104.761	31.8668	104.761	31.8668	104.761	0.000430019	0.000133177	3.22892
378	Industrial Hotspot	IH0378	East China	Hubei		30.0702	114.927	30.0702	114.927	30.0702	114.927	0.00131655	0.000448149	2.93776
379	Industrial Hotspot	IH0379	East China	Anhui		30.6269	116.86	30.6269	116.86	30.6269	116.86	0.00114359	9.19128e-05	12.4421
380	Industrial Hotspot	IH0380	East China	Hunan		27.6903	111.44	27.6903	111.44	27.6903	111.44	0.000425145	0.000240988	1.76417
381	Industrial Hotspot	IH0381	North China	Shandong		37.7472	120.508	37.7472	120.508	37.7472	120.508	0.00059334	0.000369708	1.60489
382	Industrial Hotspot	IH0382	North China	Liaoning		41.1618	121.916	41.1618	121.916	41.1618	121.916	0.000688344	7.62256e-05	9.03035
383	Industrial Hotspot	IH0383	North China	Gansu		36.4053	103.404	36.4053	103.404	36.4053	103.404	0.000311841	7.10023e-06	43.9199
384	Industrial Park	IP0384	North China	Shandong		37.4839	118.419	37.4766	118.401	37.4941	118.433	0.00135135	0.00110752	1.22016
385	Industrial Park	IP0385	North China	Gansu		38.4311	102.065	38.4196	102.052	38.4379	102.085	0.000149551	0.000247289	0.604761
386	Industrial Park	IP0386	North China	Jilin		42.3225	125.246	42.3143	125.233	42.3359	125.262	0.000429999	3.26221e-05	13.1812
387	Industrial Park	IP0387	North China	Shaanxi		38.1591	109.533	38.1476	109.521	38.1743	109.552	0.000338826	5.1987e-05	6.51752
388	Industrial Park	IP0388	North China	Shandong		38.2867	117.803	38.2773	117.777	38.3344	117.891	0.000871694	3.45462e-05	25.2327
389	Industrial Park	IP0389	North China	Shandong		36.7992	116.807	36.7932	116.791	36.8065	116.824	0.00130588	0.000296253	4.40798
390	Industrial Hotspot	IH0390	North China	Shandong		35.7499	116.759	35.7499	116.759	35.7499	116.759	0.00109257	0.000403917	2.70494
391	Industrial Park	IP0391	North China	Henan		33.9063	112.917	33.8966	112.901	33.9146	112.927	0.00118494	7.57037e-05	15.6524
392	Industrial Park	IP0392	North China	Shanxi		36.3497	113.062	36.3418	113.052	36.3591	113.075	0.00134842	0.000692321	1.94768
393	Industrial Park	IP0393	North China	Shandong		35.6273	119.722	35.6195	119.705	35.6387	119.736	0.00154622	0.000116584	13.2627
394	Industrial Hotspot	IH0394	North China	Shanxi		35.7628	111.12	35.7628	111.12	35.7628	111.12	0.00131873	9.79499e-05	13.4634
395	Industrial Park	IP0395	East China	Jiangsu		31.849	120.728	31.839	120.714	31.8642	120.74	0.00124488	0.00131472	0.946881
396	Industrial Hotspot	IH0396	North China	Shanxi		36.3616	111.712	36.3616	111.712	36.3616	111.712	0.000904229	0.000401098	2.25439
397	Industrial Hotspot	IH0397	East China	Anhui		31.2775	117.339	31.2775	117.339	31.2775	117.339	0.00100008	4.78252e-05	20.9112
398	Industrial Hotspot	IH0398	East China	Hubei		29.8931	115.443	29.8931	115.443	29.8931	115.443	0.000828141	7.8556e-06	105.42
399	Industrial Hotspot	IH0399	East China	Zhejiang		29.9379	119.821	29.9379	119.821	29.9379	119.821	0.00145722	6.03517e-05	24.1455
400	Industrial Park	IP0400	East China	Hubei		30.3938	114.859	30.3824	114.845	30.4076	114.875	0.00122473	0.000425835	2.87607
401	Industrial Hotspot	IH0401	East China	Hubei		30.1137	115.274	30.1137	115.274	30.1137	115.274	0.000757741	6.09039e-05	12.4416
402	Industrial Hotspot	IH0402	East China	Hubei		30.1613	115.066	30.1613	115.066	30.1613	115.066	0.000933115	0.000402118	2.3205
403	Industrial Park	IP0403	East China	Anhui		31.6931	118.473	31.6708	118.453	31.7239	118.493	0.00152437	0.000593677	2.56768
404	Industrial Hotspot	IH0404	East China	Anhui		30.6878	118.888	30.6878	118.888	30.6878	118.888	0.000801785	0.000135418	5.92081
405	Industrial Park	IP0405	East China	Hubei		30.1774	114.931	30.1711	114.921	30.19	114.942	0.00118766	0.000448149	2.65015
406	Industrial Hotspot	IH0406	East China	Hubei		31.7524	111.823	31.7524	111.823	31.7524	111.823	0.000647373	4.41751e-05	14.6547
407	Industrial Hotspot	IH0407	East China	Jiangxi		27.9171	114.835	27.9171	114.835	27.9171	114.835	0.000650401	0.00032151	2.02295
408	Industrial Hotspot	IH0408	South China	Guangdong		23.1262	113.505	23.1262	113.505	23.1262	113.505	0.000941182	0.00130056	0.723676
409	Industrial Park	IP0409	South China	Guangdong		23.242	111.577	23.234	111.569	23.2502	111.584	0.000461512	1.25712e-05	36.7119
410	Industrial Hotspot	IH0410	South China	Guangdong		23.0842	112.154	23.0842	112.154	23.0842	112.154	0.000407019	2.72785e-05	14.9209
411	Industrial Hotspot	IH0411	South China	Fujian		24.8642	116.198	24.8642	116.198	24.8642	116.198	0.000315	3.30763e-05	9.52344
412	Industrial Hotspot	IH0412	South China	Guangdong		22.3721	111.961	22.3721	111.961	22.3721	111.961	0.000365611	1.49336e-05	24.4824
413	Industrial Park	IP0413	South China	Guangdong		22.0832	111.644	22.0742	111.639	22.0962	111.652	0.000271527	2.04378e-05	13.2855
414	Industrial Park	IP0414	North China	Ningxia		37.4031	106.572	37.3971	106.561	37.4104	106.586	0.000221418	1.8826e-05	11.7613
415	Industrial Park	IP0415	East China	Jiangsu		31.9526	120.174	31.9491	120.147	31.9618	120.201	0.00173086	0.000714264	2.42327
416	Industrial Park	IP0416	East China	Zhejiang		28.8913	118.868	28.8858	118.855	28.8982	118.884	0.000626229	0.000233636	2.68035
417	Industrial Hotspot	IH0417	South China	Guangdong		23.7503	116.134	23.7503	116.134	23.7503	116.134	0.000451517	2.51598e-05	17.946
418	Industrial Park	IP0418	South China	Fujian		25.1838	116.724	25.1791	116.716	25.1915	116.735	0.000175149	9.97876e-06	17.5522
419	Industrial Hotspot	IH0419	South China	Guangdong		23.666	114.32	23.666	114.32	23.666	114.32	8.83247e-05	4.53079e-05	1.94943
420	Industrial Hotspot	IH0420	South China	Guangdong		23.6106	114.205	23.6106	114.205	23.6106	114.205	0.000421492	8.4949e-06	49.6171
421	Industrial Hotspot	IH0421	South China	Guangdong		22.026	112.356	22.026	112.356	22.026	112.356	0.000452644	2.88649e-05	15.6815
422	Industrial Hotspot	IH0422	North China	Shanxi		36.7089	112.582	36.7089	112.582	36.7089	112.582	0.000670623	1.00422e-05	66.7803
423	Industrial Park	IP0423	Northwest China	Xinjiang		43.0736	90.1665	43.0681	90.1573	43.0835	90.1791	0.000158052	1.89106e-05	8.35786
424	Industrial Park	IP0424	North China	Shanxi		35.7014	110.78	35.6908	110.771	35.7099	110.797	0.00108731	0.000238431	4.56028
425	Industrial Hotspot	IH0425	North China	Shandong		35.2241	119.084	35.2241	119.084	35.2241	119.084	0.00097442	0.000111099	8.77073
426	Industrial Hotspot	IH0426	North China	Henan		36.1908	114.061	36.1908	114.061	36.1908	114.061	0.00156307	0.000182242	8.57687
427	Industrial Hotspot	IH0427	North China	Shanxi		37.4039	112.585	37.4039	112.585	37.4039	112.585	0.00106985	0.000105779	10.114
428	Industrial Hotspot	IH0428	East China	Jiangsu		31.7209	119.394	31.7209	119.394	31.7209	119.394	0.00101871	7.70671e-05	13.2184
429	Industrial Hotspot	IH0429	East China	Anhui		32.756	117.31	32.756	117.31	32.756	117.31	0.000872739	0.000587238	1.48618
430	Industrial Park	IP0430	North China	Henan		34.1167	112.82	34.107	112.801	34.1299	112.838	0.00127502	0.00021366	5.96751
431	Industrial Hotspot	IH0431	South China	Guangdong		24.7554	116.191	24.7554	116.191	24.7554	116.191	0.000246486	2.58679e-05	9.52865
432	Industrial Hotspot	IH0432	South China	Guangxi		22.7093	109.806	22.7093	109.806	22.7093	109.806	0.000393693	4.86537e-05	8.09173
433	Industrial Hotspot	IH0433	North China	Shaanxi		34.6548	108.218	34.6548	108.218	34.6548	108.218	0.000796865	6.36995e-05	12.5097
434	Industrial Hotspot	IH0434	North China	Shandong		36.3268	116.344	36.3268	116.344	36.3268	116.344	0.00119692	0.000370835	3.22762
435	Industrial Hotspot	IH0435	North China	Jiangsu		34.9093	116.824	34.9093	116.824	34.9093	116.824	0.00114221	0.0002199	5.19423
436	Industrial Hotspot	IH0436	North China	Hebei		40.1537	117.99	40.1537	117.99	40.1537	117.99	0.00116788	0.000774331	1.50824
437	Industrial Park	IP0437	North China	Liaoning		40.6211	122.343	40.6146	122.331	40.6279	122.355	0.00145749	0.000922647	1.57968
438	Industrial Hotspot	IH0438	North China	Hebei		38.1054	114.077	38.1054	114.077	38.1054	114.077	0.00167022	0.00043003	3.88397
439	Industrial Park	IP0439	North China	Jiangsu		34.3694	117.324	34.3606	117.315	34.381	117.332	0.00107123	0.000308583	3.47146
440	Industrial Park	IP0440	North China	Jiangsu		34.3579	118.266	34.3488	118.256	34.3709	118.277	0.000922712	0.000203793	4.52769
441	Industrial Hotspot	IH0441	North China	Shandong		36.9683	121.371	36.9683	121.371	36.9683	121.371	0.000353972	5.55631e-05	6.37062
442	Industrial Park	IP0442	East China	Jiangsu		31.7204	120.841	31.7099	120.825	31.7314	120.858	0.00141337	0.000961051	1.47065
443	Industrial Hotspot	IH0443	East China	Anhui		31.1933	118.068	31.1933	118.068	31.1933	118.068	0.00158602	0.0002569	6.17368
444	Industrial Hotspot	IH0444	East China	Jiangsu		32.2561	119.572	32.2561	119.572	32.2561	119.572	0.00129748	0.000483293	2.68467
445	Industrial Park	IP0445	East China	Jiangsu		32.9154	120.29	32.9052	120.278	32.9236	120.309	0.000736306	0.000237562	3.09942
446	Industrial Park	IP0446	North China	Jiangsu		33.5612	118.982	33.5532	118.97	33.57	118.998	0.000876868	0.000134278	6.53023
447	Industrial Park	IP0447	East China	Zhejiang		29.9119	121.885	29.902	121.869	29.9246	121.909	0.000331536	0.000149053	2.22428
448	Industrial Hotspot	IH0448	Southwest China	Sichuan		32.4902	105.639	32.4902	105.639	32.4902	105.639	0.000225125	1.94197e-05	11.5926
449	Industrial Hotspot	IH0449	Southwest China	Yunnan		25.2895	100.55	25.2895	100.55	25.2895	100.55	0.000113371	5.08634e-05	2.22893
450	Industrial Hotspot	IH0450	East China	Henan		31.957	114.508	31.957	114.508	31.957	114.508	0.000719204	1.48369e-05	48.4742
451	Industrial Park	IP0451	North China	Hebei		39.7299	118.466	39.7188	118.456	39.7384	118.48	0.00178023	0.00161471	1.10251
452	Industrial Park	IP0452	North China	Liaoning		41.1771	122.471	41.1694	122.463	41.1842	122.478	0.000906036	0.000100336	9.03004
453	Industrial Hotspot	IH0453	North China	Liaoning		41.1748	121.995	41.1748	121.995	41.1748	121.995	0.000711432	0.000890442	0.798965
454	Industrial Hotspot	IH0454	Northeast China	Heilongjiang		45.3336	131.457	45.3336	131.457	45.3336	131.457	0.000216815	2.39087e-05	9.06845
455	Industrial Park	IP0455	North China	Shaanxi		38.2258	109.483	38.2179	109.474	38.2368	109.496	0.000351608	2.39936e-05	14.6542
456	Industrial Park	IP0456	East China	Jiangsu		31.9836	120.458	31.9621	120.426	32.0165	120.481	0.00157945	0.0013325	1.18533
457	Industrial Park	IP0457	North China	Shandong		35.6503	119.743	35.6389	119.738	35.6634	119.75	0.000998233	0.000105575	9.45519
458	Industrial Park	IP0458	North China	Tianjin		38.8993	117.271	38.8839	117.252	38.9158	117.288	0.00100858	0.00059826	1.68586
459	Industrial Hotspot	IH0459	North China	Liaoning		40.0448	124.318	40.0448	124.318	40.0448	124.318	0.000351526	0.00050153	0.700908
460	Industrial Park	IP0460	South China	Guangxi		21.5593	108.442	21.5549	108.435	21.5653	108.458	0.000297532	0.000118087	2.5196
461	Industrial Hotspot	IH0461	South China	Guangdong		22.6285	113.139	22.6285	113.139	22.6285	113.139	0.00118481	0.000571605	2.07277
462	Industrial Hotspot	IH0462	Southwest China	Guangxi		22.6584	107.901	22.6584	107.901	22.6584	107.901	0.000338577	4.70339e-05	7.19858
463	Industrial Hotspot	IH0463	East China	Hubei		30.3801	113.497	30.3801	113.497	30.3801	113.497	0.000864692	0.000210243	4.11283
464	Industrial Park	IP0464	Northwest China	Xinjiang		42.7042	93.5538	42.691	93.5354	42.7248	93.5813	0.000148371	1.36109e-06	109.009
465	Industrial Park	IP0465	North China	Inner Mongolia		40.5803	109.354	40.5746	109.343	40.5925	109.366	0.00086416	4.33255e-05	19.9458
466	Industrial Hotspot	IH0466	North China	Hebei		39.8433	118.345	39.8433	118.345	39.8433	118.345	0.00190949	0.000471839	4.0469
467	Industrial Park	IP0467	North China	Hebei		39.7525	118.48	39.7493	118.455	39.7622	118.507	0.00163357	0.0011545	1.41496
468	Industrial Hotspot	IH0468	North China	Inner Mongolia		39.411	107.077	39.411	107.077	39.411	107.077	0.000247344	0.000254142	0.97325
469	Industrial Park	IP0469	North China	Hebei		39.4955	118.273	39.4586	118.242	39.5105	118.286	0.0011687	0.000522128	2.23834
470	Industrial Hotspot	IH0470	North China	Hebei		39.6297	118.44	39.6297	118.44	39.6297	118.44	0.00140074	0.00161471	0.867487
471	Industrial Hotspot	IH0471	North China	Hebei		39.6554	118.68	39.6554	118.68	39.6554	118.68	0.000965895	0.000436679	2.21191
472	Industrial Hotspot	IH0472	North China	Shaanxi		34.9651	109.216	34.9651	109.216	34.9651	109.216	0.000799266	7.07745e-05	11.2931
473	Industrial Hotspot	IH0473	North China	Shaanxi		34.9136	109.029	34.9136	109.029	34.9136	109.029	0.000874756	7.07745e-05	12.3598
474	Industrial Park	IP0474	North China	Hebei		37.1812	114.492	37.1733	114.488	37.189	114.499	0.00179755	0.00051483	3.49155
475	Industrial Park	IP0475	North China	Hebei		37.0828	114.385	37.0782	114.377	37.0912	114.391	0.00263854	0.000509277	5.18095
476	Industrial Hotspot	IH0476	North China	Henan		34.6852	111.115	34.6852	111.115	34.6852	111.115	0.000675632	0.000167074	4.04391
477	Industrial Hotspot	IH0477	North China	Henan		36.2508	114.087	36.2508	114.087	36.2508	114.087	0.00131562	0.000374795	3.51024
478	Industrial Hotspot	IH0478	North China	Shanxi		35.8056	110.687	35.8056	110.687	35.8056	110.687	0.000861892	4.36028e-05	19.7669
479	Industrial Hotspot	IH0479	East China	Henan		32.7808	114.037	32.7808	114.037	32.7808	114.037	0.000871142	0.00026068	3.3418
480	Industrial Hotspot	IH0480	Southwest China	Sichuan		32.2497	106.464	32.2497	106.464	32.2497	106.464	0.000283849	3.29163e-05	8.62334
481	Industrial Hotspot	IH0481	East China	Zhejiang		29.3337	119.051	29.3337	119.051	29.3337	119.051	0.00067194	9.14403e-05	7.3484
482	Industrial Hotspot	IH0482	East China	Henan		32.4887	112.747	32.4887	112.747	32.4887	112.747	0.000890873	4.93687e-05	18.0453
483	Industrial Park	IP0483	East China	Jiangsu		31.9021	118.606	31.8867	118.592	31.9205	118.623	0.00126996	0.000174041	7.29691
484	Industrial Park	IP0484	East China	Hunan		27.817	112.895	27.8032	112.886	27.8339	112.912	0.0010729	0.00075641	1.41841
485	Industrial Park	IP0485	East China	Jiangxi		27.784	114.906	27.7737	114.873	27.7971	114.934	0.000734914	0.00032151	2.28582
486	Industrial Hotspot	IH0486	East China	Hunan		27.174	111.408	27.174	111.408	27.174	111.408	0.000743235	0.000122366	6.07387
487	Industrial Park	IP0487	East China	Jiangxi		28.3334	117.224	28.3237	117.211	28.3476	117.244	0.000600943	0.000208117	2.88752
488	Industrial Park	IP0488	East China	Hunan		27.7472	111.96	27.7309	111.944	27.76	111.975	0.000793446	0.000120283	6.59652
489	Industrial Park	IP0489	East China	Jiangxi		27.6242	113.725	27.6124	113.718	27.6352	113.734	0.000819491	0.000286254	2.86281
490	Industrial Hotspot	IH0490	East China	Jiangxi		28.1806	114.629	28.1806	114.629	28.1806	114.629	0.000617941	3.4089e-05	18.1273
491	Industrial Hotspot	IH0491	East China	Hunan		27.7088	111.853	27.7088	111.853	27.7088	111.853	0.000954311	0.000145354	6.56544
492	Industrial Hotspot	IH0492	East China	Fujian		26.0261	117.157	26.0261	117.157	26.0261	117.157	0.000366638	6.26358e-06	58.5349
493	Industrial Hotspot	IH0493	East China	Hunan		27.5528	113.127	27.5528	113.127	27.5528	113.127	0.000815236	6.96288e-05	11.7083
494	Industrial Hotspot	IH0494	East China	Jiangxi		27.6967	113.825	27.6967	113.825	27.6967	113.825	0.000628288	0.000344892	1.82169
495	Industrial Hotspot	IH0495	East China	Hunan		27.9637	113.217	27.9637	113.217	27.9637	113.217	0.000675284	0.000838471	0.805375
496	Industrial Park	IP0496	Southwest China	Sichuan		31.4339	104.222	31.4225	104.208	31.4446	104.238	0.000541786	0.000153085	3.53912
497	Industrial Park	IP0497	East China	Jiangxi		28.6452	115.991	28.636	115.982	28.6533	116.002	0.000656348	0.00146459	0.448146
498	Industrial Park	IP0498	South China	Guangxi		24.3766	109.379	24.3598	109.364	24.4025	109.39	0.000301592	0.00151304	0.199328
499	Industrial Hotspot	IH0499	South China	Guangdong		24.1848	113.952	24.1848	113.952	24.1848	113.952	0.000577156	7.98984e-06	72.2362
500	Industrial Hotspot	IH0500	South China	Fujian		24.6414	117.372	24.6414	117.372	24.6414	117.372	0.00045263	6.37473e-05	7.10038
501	Industrial Hotspot	IH0501	South China	Fujian		24.878	117.056	24.878	117.056	24.878	117.056	0.000238448	1.72108e-05	13.8545
502	Industrial Hotspot	IH0502	South China	Guangdong		24.1743	112.763	24.1743	112.763	24.1743	112.763	0.000299957	1.22393e-05	24.5077
503	Industrial Hotspot	IH0503	South China	Fujian		25.2399	117.162	25.2399	117.162	25.2399	117.162	0.000253798	0.000274833	0.923465
504	Industrial Hotspot	IH0504	South China	Fujian		25.1464	117.159	25.1464	117.159	25.1464	117.159	0.000207087	0.00032752	0.632287
505	Industrial Park	IP0505	South China	Guangxi		22.7636	110.423	22.7547	110.416	22.7757	110.445	0.000269823	4.82329e-05	5.59418
506	Industrial Park	IP0506	South China	Guangxi		23.1433	109.355	23.1359	109.351	23.1552	109.36	0.000445239	1.28227e-05	34.7229
507	Industrial Hotspot	IH0507	South China	Guangxi		22.9351	109.565	22.9351	109.565	22.9351	109.565	0.00072004	2.59912e-05	27.7032
508	Industrial Hotspot	IH0508	South China	Guangxi		23.0364	108.082	23.0364	108.082	23.0364	108.082	0.000365653	3.15343e-05	11.5954
509	Industrial Hotspot	IH0509	South China	Guangxi		23.2084	109.157	23.2084	109.157	23.2084	109.157	0.000316694	2.47864e-05	12.7769
510	Industrial Park	IP0510	South China	Guangxi		23.0883	108.209	23.084	108.204	23.1002	108.215	0.000527662	3.15343e-05	16.733
511	Industrial Hotspot	IH0511	North China	Jiangsu		34.5833	119.554	34.5833	119.554	34.5833	119.554	0.000841714	8.67642e-07	970.117
512	Industrial Park	IP0512	South China	Guangxi		23.4916	110.494	23.4824	110.488	23.5005	110.503	0.000136402	3.84928e-05	3.54356
513	Industrial Hotspot	IH0513	South China	Hubei	Huagang	30.0852	112.308	30.0749	112.296	30.0969	112.32	0.00073504	3.81e-05	19.2924
514	Industrial Park	IP0514	North China	Shanxi		37.1894	111.659	37.1802	111.645	37.2002	111.679	0.00167893	0.000300452	5.58802
515	Industrial Park	IP0515	North China	Inner Mongolia		39.856	106.892	39.8398	106.873	39.8779	106.913	0.00027074	5.84015e-05	4.63584
516	Industrial Park	IP0516	North China	Tianjin		39.3054	117.789	39.2909	117.75	39.3242	117.818	0.00179522	0.000674636	2.66101
517	Industrial Hotspot	IH0517	North China	Tianjin		39.2752	117.287	39.2752	117.287	39.2752	117.287	0.00153359	7.78092e-05	19.7096
518	Industrial Park	IP0518	North China	Tianjin		38.8984	116.978	38.8789	116.961	38.9075	116.993	0.00119137	0.000717506	1.66043
519	Industrial Hotspot	IH0519	North China	Beijing		39.5974	116.032	39.5974	116.032	39.5974	116.032	0.00102295	0.000284547	3.59499
520	Industrial Park	IP0520	North China	Tianjin		38.8418	117.045	38.8199	117.022	38.8644	117.068	0.00147501	7.27142e-05	20.285
521	Industrial Hotspot	IH0521	North China	Hebei		36.6601	113.993	36.6601	113.993	36.6601	113.993	0.00167049	0.000440464	3.79257
522	Industrial Hotspot	IH0522	North China	Shanxi		35.7271	112.803	35.7271	112.803	35.7271	112.803	0.00120087	0.00103243	1.16315
523	Industrial Park	IP0523	North China	Shandong		36.2395	116.151	36.2321	116.139	36.2471	116.16	0.00101597	0.0001161	8.75081
524	Industrial Park	IP0524	North China	Shandong		35.0939	116.567	35.0888	116.553	35.102	116.579	0.00130218	0.000104948	12.4078
525	Industrial Park	IP0525	North China	Shanxi		37.5672	112.251	37.539	112.214	37.596	112.284	0.00106641	0.000270354	3.94449
526	Industrial Hotspot	IH0526	North China	Shanxi		37.8913	112.666	37.8913	112.666	37.8913	112.666	0.000275263	0.00430493	0.0639415
527	Industrial Hotspot	IH0527	North China	Shandong		36.5639	117.969	36.5639	117.969	36.5639	117.969	0.000572211	0.000884036	0.647271
528	Industrial Hotspot	IH0528	North China	Shanxi		36.532	113.37	36.532	113.37	36.532	113.37	0.00131831	7.74369e-05	17.0243
529	Industrial Hotspot	IH0529	East China	Zhejiang		31.0957	119.752	31.0957	119.752	31.0957	119.752	0.000773292	0.000144133	5.36513
530	Industrial Hotspot	IH0530	North China	Henan		34.3234	112.899	34.3234	112.899	34.3234	112.899	0.000928169	0.000153532	6.04543
531	Industrial Park	IP0531	East China	Jiangsu		31.8895	120.191	31.8817	120.181	31.898	120.2	0.00148335	0.000714264	2.07675
532	Industrial Hotspot	IH0532	North China	Henan		34.6553	113.373	34.6553	113.373	34.6553	113.373	0.001454	0.000447581	3.24859
533	Industrial Hotspot	IH0533	East China	Anhui		31.0414	119.602	31.0414	119.602	31.0414	119.602	0.00118434	6.06447e-05	19.5292
534	Industrial Hotspot	IH0534	East China	Anhui		30.7885	118.973	30.7885	118.973	30.7885	118.973	0.000353437	0.000101918	3.46784
535	Industrial Park	IP0535	East China	Anhui		31.5019	118.465	31.4933	118.451	31.5097	118.479	0.0010012	0.00113909	0.878948
536	Industrial Hotspot	IH0536	North China	Anhui		34.0313	116.807	34.0313	116.807	34.0313	116.807	0.00127741	0.000153924	8.29895
537	Industrial Hotspot	IH0537	North China	Henan		34.0468	113.154	34.0468	113.154	34.0468	113.154	0.00111995	5.94277e-05	18.8455
538	Industrial Park	IP0538	North China	Henan		33.8604	112.998	33.8543	112.991	33.8709	113.009	0.00102762	0.000182723	5.62393
539	Industrial Park	IP0539	North China	Henan		34.7349	112.057	34.7262	112.04	34.7468	112.071	0.00126902	0.00040074	3.16669
540	Industrial Hotspot	IH0540	East China	Jiangxi		28.2871	115.717	28.2871	115.717	28.2871	115.717	0.000856648	6.42735e-05	13.3282
541	Industrial Hotspot	IH0541	East China	Jiangxi		28.2222	115.698	28.2222	115.698	28.2222	115.698	0.00058286	0.000160757	3.62572
542	Industrial Hotspot	IH0542	East China	Hunan		27.9836	112.847	27.9836	112.847	27.9836	112.847	0.000916839	0.00075641	1.21209
543	Industrial Hotspot	IH0543	East China	Jiangxi		27.86	114.746	27.86	114.746	27.86	114.746	0.000560422	0.00020243	2.76847
544	Industrial Hotspot	IH0544	East China	Hubei		30.0484	114.927	30.0484	114.927	30.0484	114.927	0.00120135	0.000448149	2.68069
545	Industrial Hotspot	IH0545	East China	Hubei		30.2777	114.333	30.2777	114.333	30.2777	114.333	0.00113379	0.000180148	6.29368
546	Industrial Park	IP0546	East China	Hubei		30.2028	115.134	30.1956	115.118	30.2088	115.16	0.0010476	0.000402118	2.60521
547	Industrial Hotspot	IH0547	East China	Hubei		30.3946	114.939	30.3946	114.939	30.3946	114.939	0.000996201	0.000425835	2.33941
548	Industrial Park	IP0548	East China	Jiangxi		27.6451	113.902	27.6386	113.892	27.6527	113.91	0.000333746	0.000344892	0.967683
549	Industrial Hotspot	IH0549	East China	Hubei		29.8655	113.803	29.8655	113.803	29.8655	113.803	0.000961952	0.000121072	7.9453
550	Industrial Hotspot	IH0550	East China	Jiangxi		28.7014	117.083	28.7014	117.083	28.7014	117.083	0.000596822	5.79004e-05	10.3077
551	Industrial Park	IP0551	East China	Zhejiang		28.6954	118.585	28.68	118.578	28.7107	118.598	0.000546941	0.000101103	5.40977
552	Industrial Hotspot	IH0552	East China	Hubei		29.9084	115.391	29.9084	115.391	29.9084	115.391	0.00108973	7.8556e-06	138.72
553	Industrial Hotspot	IH0553	East China	Hunan		27.6209	111.422	27.6209	111.422	27.6209	111.422	0.000666497	0.000240988	2.76568
554	Industrial Hotspot	IH0554	East China	Hunan		26.721	111.834	26.721	111.834	26.721	111.834	0.000541907	6.35471e-05	8.52765
555	Industrial Park	IP0555	East China	Fujian		26.259	117.612	26.2492	117.603	26.2732	117.62	0.000186621	0.000146525	1.27365
556	Industrial Hotspot	IH0556	East China	Jiangxi		25.8441	115.881	25.8441	115.881	25.8441	115.881	0.000184881	1.14274e-05	16.1787
557	Industrial Hotspot	IH0557	South China	Guangdong		24.5514	116.159	24.5514	116.159	24.5514	116.159	0.000254784	1.86595e-05	13.6544
558	Industrial Hotspot	IH0558	South China	Guangdong		24.0778	114.942	24.0778	114.942	24.0778	114.942	8.2347e-05	3.48521e-05	2.36275
559	Industrial Park	IP0559	South China	Guangdong		23.0438	111.989	23.0275	111.973	23.0583	112.002	0.00050407	2.34034e-05	21.5384
560	Industrial Park	IP0560	East China	Jiangsu		32.2635	118.806	32.2331	118.778	32.2923	118.852	0.00103318	0.00136687	0.755873
561	Industrial Park	IP0561	North China	Inner Mongolia		40.775	113.289	40.7706	113.248	40.7857	113.309	0.000392078	2.715e-05	14.4412
562	Industrial Hotspot	IH0562	Northwest China	Xinjiang		42.1333	83.1229	42.1333	83.1229	42.1333	83.1229	0.000102234	1.45525e-06	70.2517
563	Industrial Hotspot	IH0563	East China	Anhui		31.077	119.577	31.077	119.577	31.077	119.577	0.00128772	6.06447e-05	21.2339
564	Industrial Hotspot	IH0564	East China	Zhejiang		31.0913	119.688	31.0913	119.688	31.0913	119.688	0.00146834	6.06447e-05	24.2121
565	Industrial Hotspot	IH0565	East China	Jiangsu		32.041	118.423	32.041	118.423	32.041	118.423	0.00119357	9.92202e-05	12.0295
566	Industrial Park	IP0566	East China	Jiangsu		31.6007	119.724	31.5965	119.711	31.6082	119.739	0.00121926	0.000191391	6.37051
567	Industrial Hotspot	IH0567	East China	Zhejiang		29.4228	119.152	29.4228	119.152	29.4228	119.152	0.000701477	9.14403e-05	7.67142
568	Industrial Hotspot	IH0568	South China	Fujian		24.825	117.015	24.825	117.015	24.825	117.015	0.000235981	2.57789e-05	9.15404
569	Industrial Hotspot	IH0569	South China	Fujian		24.9175	116.9	24.9175	116.9	24.9175	116.9	0.000356272	7.89009e-05	4.51544
570	Industrial Hotspot	IH0570	South China	Fujian		25.3551	117.374	25.3551	117.374	25.3551	117.374	0.000222116	7.08327e-05	3.13579
571	Industrial Hotspot	IH0571	South China	Fujian		25.0523	117.077	25.0523	117.077	25.0523	117.077	0.000213346	0.00032752	0.651397
572	Industrial Hotspot	IH0572	South China	Fujian		25.2263	118.021	25.2263	118.021	25.2263	118.021	0.000306636	0.000172694	1.7756
573	Industrial Hotspot	IH0573	South China	Guangdong		24.5994	116.15	24.5994	116.15	24.5994	116.15	0.00033966	1.86595e-05	18.2031
574	Industrial Park	IP0574	South China	Guangdong		23.0281	113.535	23.0019	113.527	23.0571	113.555	0.00209072	0.00136507	1.53159
575	Industrial Park	IP0575	East China	Zhejiang		30.601	121.046	30.563	121.01	30.6266	121.058	0.00100376	0.000294371	3.40986
576	Industrial Hotspot	IH0576	North China	Shandong		34.7069	117.272	34.7069	117.272	34.7069	117.272	0.000983452	0.000235087	4.18335
577	Industrial Park	IP0577	North China	Shanxi		39.9155	113.172	39.9096	113.156	39.9263	113.181	0.000275208	0.000617933	0.445369
578	Industrial Park	IP0578	North China	Inner Mongolia		40.6436	109.751	40.6173	109.712	40.6739	109.777	0.00137581	0.00226922	0.606291
579	Industrial Hotspot	IH0579	East China	Zhejiang		29.4321	119.244	29.4321	119.244	29.4321	119.244	0.000633559	8.64313e-05	7.33021
580	Industrial Park	IP0580	East China	Jiangxi		29.2508	117.174	29.2433	117.166	29.2623	117.185	0.000567882	0.000168506	3.3701
581	Industrial Hotspot	IH0581	East China	Jiangxi		25.8159	115.466	25.8159	115.466	25.8159	115.466	0.000244153	5.8872e-05	4.14718
582	Industrial Hotspot	IH0582	South China	Guangdong		24.5216	116.174	24.5216	116.174	24.5216	116.174	0.000291574	1.86595e-05	15.6261
583	Industrial Park	IP0583	East China	Fujian		25.9966	117.314	25.9937	117.306	26.0163	117.336	0.000492651	0.000101435	4.85681
584	Industrial Hotspot	IH0584	South China	Jiangxi		25.4545	114.891	25.4545	114.891	25.4545	114.891	0.000172951	4.68615e-05	3.69069
585	Industrial Hotspot	IH0585	East China	Fujian		25.7759	117.714	25.7759	117.714	25.7759	117.714	0.000231312	1.62177e-05	14.2629
586	Industrial Park	IP0586	East China	Jiangxi		28.1479	115.51	28.14	115.504	28.1579	115.517	0.000432089	0.000133692	3.23196
587	Industrial Park	IP0587	South China	Guangdong		24.7046	113.64	24.6941	113.624	24.722	113.662	0.000118946	5.44058e-05	2.18628
588	Industrial Hotspot	IH0588	South China	Guangdong		22.7426	111.733	22.7426	111.733	22.7426	111.733	0.000185225	1.88409e-05	9.83101
589	Industrial Hotspot	IH0589	Southwest China	Sichuan		27.0791	102.168	27.0791	102.168	27.0791	102.168	0.000169607	2.89006e-05	5.86862
590	Industrial Park	IP0590	Northwest China	Xinjiang		43.9019	81.8037	43.8954	81.777	43.9124	81.8401	0.00010595	1.57318e-05	6.73481
591	Industrial Hotspot	IH0591	Northeast China	Jilin		44.386	123.179	44.386	123.179	44.386	123.179	0.000153376	0.000151145	1.01476
592	Industrial Hotspot	IH0592	North China	Gansu		36.4407	102.872	36.4407	102.872	36.4407	102.872	0.000439677	0.000193112	2.2768
593	Industrial Hotspot	IH0593	East China	Zhejiang		29.9133	121.918	29.9133	121.918	29.9133	121.918	0.000458546	0.000149053	3.07639
594	Industrial Hotspot	IH0594	East China	Anhui		30.5891	116.961	30.5891	116.961	30.5891	116.961	0.00112513	9.19128e-05	12.2412
595	Industrial Park	IP0595	East China	Anhui		31.2298	118.149	31.221	118.135	31.2418	118.169	0.00120194	0.000236043	5.09205
596	Industrial Hotspot	IH0596	East China	Jiangxi		26.3976	115.772	26.3976	115.772	26.3976	115.772	0.000187638	2.06204e-05	9.09963
597	Industrial Hotspot	IH0597	East China	Fujian		26.2854	116.936	26.2854	116.936	26.2854	116.936	0.00020082	7.72523e-06	25.9953
598	Industrial Hotspot	IH0598	North China	Hebei		37.1551	114.54	37.1551	114.54	37.1551	114.54	0.00219275	0.000534268	4.10422
599	Industrial Hotspot	IH0599	Southwest China	Yunnan		26.1298	103.168	26.1298	103.168	26.1298	103.168	0.000117664	4.85299e-05	2.42456
600	Industrial Hotspot	IH0600	South China	Guangxi		22.5577	110.196	22.5577	110.196	22.5577	110.196	0.000234806	0.000198624	1.18216
601	Industrial Hotspot	IH0601	North China	Liaoning		41.169	122.875	41.169	122.875	41.169	122.875	0.00220668	0.00174204	1.26672
602	Industrial Hotspot	IH0602	South China	Fujian		24.9493	117.11	24.9493	117.11	24.9493	117.11	0.000173671	1.72108e-05	10.0908
603	Industrial Hotspot	IH0603	East China	Hunan		25.9582	113.236	25.9582	113.236	25.9582	113.236	0.000291447	0.00037329	0.780753
604	Industrial Hotspot	IH0604	South China	Guangxi		24.7086	111.39	24.7086	111.39	24.7086	111.39	0.000254207	2.68323e-05	9.47392
605	Industrial Hotspot	IH0605	Southwest China	Guizhou		25.1168	105.357	25.1168	105.357	25.1168	105.357	0.000170509	2.23008e-05	7.64585
606	Industrial Park	IP0606	Southwest China	Yunnan		25.2857	103.93	25.2774	103.918	25.2974	103.942	0.000210275	0.000180566	1.16454
607	Industrial Hotspot	IH0607	Northwest China	Xinjiang		41.1666	83.6963	41.1666	83.6963	41.1666	83.6963	5.56406e-05	6.03638e-06	9.21754
608	Industrial Park	IP0608	North China	Tianjin		39.2384	117.432	39.2268	117.397	39.2456	117.439	0.00149214	0.00221738	0.672928
609	Industrial Park	IP0609	North China	Hebei		39.8575	118.037	39.849	118.031	39.8661	118.047	0.00223262	0.000571829	3.90435
610	Industrial Hotspot	IH0610	Northeast China	Heilongjiang		45.7499	131.074	45.7499	131.074	45.7499	131.074	0.000228409	7.65e-05	2.98573
611	Industrial Park	IP0611	Northeast China	Heilongjiang		46.7922	130.434	46.7707	130.425	46.8256	130.468	0.000214691	0.000565355	0.379745
612	Industrial Park	IP0612	Northwest China	Xinjiang		41.7288	81.6644	41.713	81.6503	41.7405	81.6807	0.000132304	5.79021e-06	22.8495
613	Industrial Hotspot	IH0613	North China	Henan		36.1365	114.118	36.1365	114.118	36.1365	114.118	0.00132312	0.000182242	7.26022
614	Industrial Park	IP0614	North China	Shanxi		37.1183	112.017	37.113	112.01	37.1244	112.032	0.00140127	0.00034846	4.02133
615	Industrial Park	IP0615	North China	Shanxi		37.1233	111.825	37.0969	111.806	37.1408	111.836	0.00140318	0.00144708	0.969665
616	Industrial Hotspot	IH0616	North China	Hebei		40.0934	118.933	40.0934	118.933	40.0934	118.933	0.000669657	0.000525958	1.27322
617	Industrial Park	IP0617	North China	Liaoning		40.9795	122.943	40.9727	122.932	40.9849	122.963	0.00073002	0.000402285	1.81468
618	Industrial Park	IP0618	North China	Shandong		36.7351	118.096	36.7198	118.083	36.7425	118.107	0.000993379	0.000413703	2.40119
619	Industrial Park	IP0619	North China	Shandong		36.6459	119.229	36.6341	119.216	36.6493	119.251	0.000921941	0.00100188	0.920215
620	Industrial Park	IP0620	North China	Shandong		36.9706	118.954	36.9622	118.948	36.9822	118.959	0.000881915	0.000424736	2.07638
621	Industrial Park	IP0621	North China	Shandong		36.484	116.33	36.4792	116.313	36.49	116.348	0.0013215	0.000370835	3.56357
622	Industrial Hotspot	IH0622	East China	Zhejiang		29.1524	119.537	29.1524	119.537	29.1524	119.537	0.00016751	0.000297385	0.563276
623	Industrial Park	IP0623	East China	Zhejiang		28.6846	118.548	28.6727	118.528	28.694	118.572	0.000765336	0.000101103	7.5699
624	Industrial Park	IP0624	East China	Zhejiang		28.9668	118.456	28.9609	118.448	28.977	118.466	0.000537382	3.14417e-05	17.0914
625	Industrial Hotspot	IH0625	East China	Jiangxi		27.0685	115.741	27.0685	115.741	27.0685	115.741	0.000196746	2.12984e-05	9.23758
626	Industrial Hotspot	IH0626	East China	Jiangxi		25.9528	115.313	25.9528	115.313	25.9528	115.313	0.000321961	5.8872e-05	5.46883
627	Industrial Hotspot	IH0627	East China	Fujian		26.7816	117.776	26.7816	117.776	26.7816	117.776	0.000140876	3.03265e-05	4.64531
628	Industrial Hotspot	IH0628	South China	Guangdong		22.6182	111.722	22.6182	111.722	22.6182	111.722	0.000458632	1.30913e-05	35.0334
629	Industrial Hotspot	IH0629	South China	Guangdong		23.6428	114.366	23.6428	114.366	23.6428	114.366	0.000215307	4.53079e-05	4.75209
630	Industrial Park	IP0630	Northwest China	Qinghai		36.7298	95.2236	36.7128	95.187	36.7447	95.2475	6.8953e-05	7.03826e-07	97.9688
631	Industrial Park	IP0631	Southwest China	Yunnan		25.5388	103.739	25.5296	103.728	25.5511	103.749	0.00038071	8.1269e-05	4.68456
632	Industrial Hotspot	IH0632	East China	Fujian		26.9906	119.717	26.9906	119.717	26.9906	119.717	0.000198126	8.18815e-05	2.41966
633	Industrial Park	IP0633	North China	Liaoning		40.7297	120.92	40.7196	120.9	40.7392	120.944	0.000842106	0.000505862	1.66469
634	Industrial Park	IP0634	Northeast China	Jilin		44.0124	126.538	43.9994	126.529	44.034	126.548	0.000619082	0.000179752	3.44409
635	Industrial Hotspot	IH0635	East China	Zhejiang		29.8755	119.745	29.8755	119.745	29.8755	119.745	0.00129888	0.000119832	10.8392
636	Industrial Park	IP0636	East China	Fujian		25.7409	119.594	25.7325	119.585	25.7556	119.604	0.000204978	7.76169e-05	2.64089
637	Industrial Park	IP0637	Southwest China	Guangxi		23.5464	107.116	23.539	107.109	23.5583	107.121	0.000447736	9.80755e-05	4.56521
638	Industrial Park	IP0638	South China	Guangxi		24.3702	109.249	24.367	109.241	24.3809	109.265	0.000458314	0.000847171	0.540994
639	Industrial Hotspot	IH0639	South China	Guangxi		24.7206	108.146	24.7206	108.146	24.7206	108.146	0.000212965	4.93009e-05	4.31971
640	Industrial Hotspot	IH0640	Southwest China	Sichuan		26.3819	101.975	26.3819	101.975	26.3819	101.975	6.8961e-05	2.1005e-05	3.28308
641	Industrial Hotspot	IH0641	North China	Liaoning		41.1741	122.946	41.1741	122.946	41.1741	122.946	0.00296307	0.00174204	1.70092
642	Industrial Hotspot	IH0642	Southwest China	Tibet	Huaxin	29.2634	91.9271	29.2634	91.9271	29.2634	91.9271	7.29e-05	5.19e-06	14.0462
643	Industrial Park	IP0643	South China	Guangxi		21.6814	108.408	21.6632	108.399	21.7027	108.425	0.000202124	0.000118087	1.71166
644	Industrial Park	IP0644	Northeast China	Liaoning		42.5641	124.165	42.5535	124.16	42.5764	124.175	0.000170471	0.000297413	0.573178
645	Industrial Park	IP0645	East China	Zhejiang	Jiaochuan	29.9863	121.664	29.9718	121.637	29.9874	121.699	0.00098061	0.00216427	0.453089
646	Industrial Hotspot	IH0646	North China	Shanxi		37.4088	110.797	37.4088	110.797	37.4088	110.797	0.000678531	0.00061246	1.10788
647	Industrial Park	IP0647	North China	Shandong		34.9854	117.04	34.9783	117.03	34.991	117.058	0.00100076	0.000534432	1.87256
648	Industrial Park	IP0648	North China	Shandong		36.3167	120.284	36.3029	120.265	36.3334	120.312	0.00102709	0.00157821	0.650796
649	Industrial Hotspot	IH0649	North China	Shanxi		35.679	111.515	35.679	111.515	35.679	111.515	0.000965927	0.000305732	3.1594
650	Industrial Park	IP0650	East China	Jiangsu		31.6776	120.257	31.6696	120.248	31.6879	120.274	0.0016691	0.0021372	0.780977
651	Industrial Hotspot	IH0651	Southwest China	Guizhou	Zhongjing	26.6657	104.746	26.6657	104.746	26.6657	104.746	0.000414707	1.06e-05	39.1233
652	Industrial Park	IP0652	Southwest China	Guizhou		25.2955	104.881	25.2888	104.873	25.305	104.889	7.7177e-05	6.16911e-05	1.25102
653	Industrial Hotspot	IH0653	Southwest China	Guizhou		26.6155	107.24	26.6155	107.24	26.6155	107.24	0.000153139	4.10886e-05	3.72704
654	Industrial Hotspot	IH0654	Southwest China	Guizhou		26.5385	106.892	26.5385	106.892	26.5385	106.892	0.000279075	0.000213992	1.30414
655	Industrial Park	IP0655	Southwest China	Guizhou		26.3434	106.628	26.338	106.621	26.3519	106.634	0.000475752	0.000272414	1.74643
656	Industrial Hotspot	IH0656	Southwest China	Guizhou		26.1686	105.663	26.1686	105.663	26.1686	105.663	0.00027891	4.98806e-05	5.59156
657	Industrial Hotspot	IH0657	Southwest China	Guizhou		26.3935	106.273	26.3935	106.273	26.3935	106.273	0.000520147	0.000117951	4.40984
658	Industrial Hotspot	IH0658	Southwest China	Guangxi		23.7372	106.779	23.7372	106.779	23.7372	106.779	0.000345742	5.67747e-05	6.08972
659	Industrial Hotspot	IH0659	Northeast China	Jilin		45.2727	122.816	45.2727	122.816	45.2727	122.816	0.000212553	0.00016185	1.31327
660	Industrial Hotspot	IH0660	North China	Henan		34.7879	112.611	34.7879	112.611	34.7879	112.611	0.00156404	0.000245143	6.38009
661	Industrial Park	IP0661	North China	Hebei		38.0791	114.034	38.0682	114.016	38.0936	114.054	0.00196671	0.00043003	4.57343
662	Industrial Hotspot	IH0662	North China	Tianjin		38.8557	117.419	38.8557	117.419	38.8557	117.419	0.00157935	0.000676532	2.33447
663	Industrial Park	IP0663	North China	Hebei		39.646	118.209	39.6332	118.19	39.6586	118.229	0.00184909	0.00471939	0.391807
664	Industrial Park	IP0664	North China	Hebei		39.1348	118.433	39.1187	118.42	39.1563	118.448	0.00108685	1.16202e-05	93.5312
665	Industrial Park	IP0665	North China	Shandong		36.8878	118.192	36.8839	118.183	36.8972	118.203	0.00125003	0.00144974	0.862244
666	Industrial Park	IP0666	North China	Hebei		38.3878	114.143	38.3712	114.129	38.4108	114.172	0.00139956	0.000316068	4.42803
667	Industrial Park	IP0667	North China	Shandong		36.889	117.886	36.8739	117.877	36.9067	117.895	0.00123007	0.00131567	0.934939
668	Industrial Hotspot	IH0668	North China	Shandong		36.9233	117.916	36.9233	117.916	36.9233	117.916	0.00129663	0.00131567	0.985525
669	Industrial Park	IP0669	North China	Shanxi		37.245	111.712	37.2428	111.7	37.2637	111.725	0.00167006	0.000155571	10.735
670	Industrial Park	IP0670	North China	Jiangsu		34.5626	117.328	34.5474	117.308	34.5839	117.35	0.00106275	0.000238255	4.46057
671	Industrial Hotspot	IH0671	East China	Jiangsu		32.1587	118.976	32.1587	118.976	32.1587	118.976	0.00118344	0.00365801	0.323519
672	Industrial Hotspot	IH0672	East China	Hubei		30.1582	114.785	30.1582	114.785	30.1582	114.785	0.00142354	0.000448149	3.17649
673	Industrial Hotspot	IH0673	East China	Hubei		31.74	112.421	31.74	112.421	31.74	112.421	0.000686703	8.81533e-05	7.78987
674	Industrial Hotspot	IH0674	East China	Anhui		31.5291	118	31.5291	118	31.5291	118	0.00108014	0.000114483	9.43493
675	Industrial Hotspot	IH0675	East China	Hubei		30.2073	114.858	30.2073	114.858	30.2073	114.858	0.0012945	0.000448149	2.88855
676	Industrial Hotspot	IH0676	North China	Shandong		36.1798	117.375	36.1798	117.375	36.1798	117.375	0.00113869	9.55616e-05	11.9157
677	Industrial Hotspot	IH0677	North China	Shanxi		37.0969	111.53	37.0969	111.53	37.0969	111.53	0.00132489	0.000300452	4.40966
678	Industrial Hotspot	IH0678	North China	Henan		36.1654	114.065	36.1654	114.065	36.1654	114.065	0.00146906	0.000182242	8.06103
679	Industrial Hotspot	IH0679	North China	Shanxi		36.48	112.952	36.48	112.952	36.48	112.952	0.00104951	0.000363364	2.88833
680	Industrial Hotspot	IH0680	North China	Shanxi		38.6972	113.237	38.6972	113.237	38.6972	113.237	0.000602835	5.54947e-05	10.8629
681	Industrial Park	IP0681	North China	Hebei		37.7534	115.189	37.7461	115.179	37.7695	115.212	0.00125771	0.000638204	1.9707
682	Industrial Park	IP0682	North China	Jiangsu		33.8837	118.333	33.8707	118.326	33.8966	118.352	0.000691563	0.000390298	1.77188
683	Industrial Hotspot	IH0683	East China	Anhui		32.2122	118.28	32.2122	118.28	32.2122	118.28	0.000968512	9.92202e-05	9.76124
684	Industrial Hotspot	IH0684	Southwest China	Sichuan		29.7902	104.631	29.7902	104.631	29.7902	104.631	0.000853572	3.06958e-05	27.8075
685	Industrial Park	IP0685	Southwest China	Sichuan		29.3926	103.544	29.3803	103.539	29.4057	103.553	0.000717854	6.9727e-05	10.2952
686	Industrial Hotspot	IH0686	East China	Hunan		27.6724	111.865	27.6724	111.865	27.6724	111.865	0.000933992	0.000145354	6.42565
687	Industrial Hotspot	IH0687	South China	Hubei	Tanjiazui	30.9194	110.71	30.9194	110.71	30.9194	110.71	0.000295142	5.14e-06	57.4206
688	Industrial Hotspot	IH0688	Southwest China	Sichuan		32.216	106.187	32.216	106.187	32.216	106.187	0.000320523	1.03315e-05	31.0239
689	Industrial Hotspot	IH0689	Southwest China	Sichuan		30.85	107.326	30.85	107.326	30.85	107.326	0.000751189	3.13329e-05	23.9745
690	Industrial Hotspot	IH0690	Southwest China	Sichuan		30.1961	106.685	30.1961	106.685	30.1961	106.685	0.00108583	8.08713e-05	13.4267
691	Industrial Park	IP0691	South China	Guangxi		24.9305	110.829	24.9249	110.823	24.9386	110.838	0.000302556	3.45419e-05	8.75909
692	Industrial Hotspot	IH0692	Southwest China	Guizhou		27.7564	106.958	27.7564	106.958	27.7564	106.958	0.000297608	0.000138359	2.15098
693	Industrial Hotspot	IH0693	Southwest China	Sichuan		28.4253	104.72	28.4253	104.72	28.4253	104.72	0.000681156	0.000120707	5.64305
694	Industrial Park	IP0694	Southwest China	Sichuan		28.7175	105.141	28.71	105.13	28.7327	105.149	0.000865815	8.46928e-05	10.223
695	Industrial Hotspot	IH0695	Southwest China	Chongqing		29.6666	106.167	29.6666	106.167	29.6666	106.167	0.0014012	0.000196244	7.14013
696	Industrial Hotspot	IH0696	North China	Hebei		39.7694	118.24	39.7694	118.24	39.7694	118.24	0.00200525	0.000545905	3.67326
697	Industrial Park	IP0697	North China	Inner Mongolia		41.8338	119.279	41.8285	119.264	41.8405	119.292	0.000306039	4.73454e-05	6.46398
698	Industrial Park	IP0698	North China	Ningxia		39.1912	106.68	39.1775	106.663	39.2283	106.7	0.000718811	0.000282122	2.54787
699	Industrial Park	IP0699	North China	Liaoning		40.2591	122.101	40.2395	122.081	40.2814	122.12	0.00134845	0.000129201	10.4369
700	Industrial Park	IP0700	Northeast China	Heilongjiang		46.795	131.188	46.7894	131.177	46.8082	131.202	0.00036775	1.34994e-05	27.2419
701	Industrial Park	IP0701	North China	Hebei		39.192	118.902	39.1779	118.896	39.2132	118.91	0.000792006	2.58041e-05	30.6931
702	Industrial Park	IP0702	North China	Shanxi		36.4707	113.346	36.4649	113.335	36.4844	113.36	0.0013084	0.000136438	9.58971
703	Industrial Hotspot	IH0703	North China	Gansu		38.7467	101.105	38.7467	101.105	38.7467	101.105	0.000105476	1.46587e-05	7.19541
704	Industrial Hotspot	IH0704	North China	Gansu		36.251	103.578	36.251	103.578	36.251	103.578	0.000438627	0.000399544	1.09782
705	Industrial Hotspot	IH0705	Northeast China	Jilin		44.7161	126.155	44.7161	126.155	44.7161	126.155	0.000416036	5.98046e-05	6.95659
706	Industrial Park	IP0706	North China	Henan		34.0082	116.424	34.0029	116.418	34.0183	116.433	0.000917899	7.79171e-05	11.7805
707	Industrial Hotspot	IH0707	North China	Ningxia	Tianhua	39.0595	106.105	39.0566	106.096	39.0676	106.116	0.000353422	9.72e-06	36.3603
708	Industrial Park	IP0708	North China	Gansu		36.0264	104.052	36.0169	104.027	36.0387	104.094	0.000428665	4.03273e-05	10.6297
709	Industrial Park	IP0709	North China	Ningxia		37.3785	106.597	37.373	106.592	37.3859	106.605	0.0001965	1.8826e-05	10.4377
710	Industrial Park	IP0710	North China	Shanxi		37.1334	112.049	37.1252	112.042	37.1465	112.052	0.0015882	0.000317071	5.00896
711	Industrial Park	IP0711	North China	Shanxi		38.2499	111.576	38.2432	111.569	38.259	111.583	0.000481837	5.44361e-05	8.85143
712	Industrial Park	IP0712	North China	Shandong		35.9158	117.719	35.9109	117.71	35.9234	117.725	0.00112203	0.000501652	2.23668
713	Industrial Park	IP0713	North China	Inner Mongolia		42.2773	119.013	42.2723	118.996	42.2836	119.03	0.000346238	0.000362734	0.954522
714	Industrial Park	IP0714	South China	Guangdong		23.2197	112.823	23.2035	112.809	23.2356	112.84	0.000825383	0.000364737	2.26295
715	Industrial Park	IP0715	Northwest China	Xinjiang		44.0818	88.4395	44.075	88.407	44.0929	88.4741	0.000686877	3.34375e-05	20.5421
716	Industrial Park	IP0716	North China	Hebei		39.8652	117.61	39.861	117.578	39.8767	117.648	0.00138981	0.000391735	3.54784
717	Industrial Hotspot	IH0717	Southwest China	Yunnan		25.3794	98.4659	25.3794	98.4659	25.3794	98.4659	6.99173e-05	1.59922e-05	4.37197
718	Industrial Park	IP0718	Northeast China	Heilongjiang		47.4952	129.279	47.4905	129.261	47.5125	129.308	0.000167364	7.42497e-06	22.5407
719	Industrial Hotspot	IH0719	North China	Liaoning		40.3604	120.571	40.3604	120.571	40.3604	120.571	0.000605284	1.38771e-05	43.6176
720	Industrial Hotspot	IH0720	North China	Tianjin		39.2796	117.824	39.2796	117.824	39.2796	117.824	0.0015752	0.000723153	2.17824
721	Industrial Hotspot	IH0721	North China	Shanxi		35.4423	111.319	35.4423	111.319	35.4423	111.319	0.00107432	9.44114e-05	11.3792
722	Industrial Park	IP0722	North China	Shanxi		36.0123	111.472	36.0044	111.466	36.0206	111.48	0.000816589	0.000168656	4.84175
723	Industrial Hotspot	IH0723	North China	Shanxi		36.3218	111.957	36.3218	111.957	36.3218	111.957	0.000693011	9.93772e-05	6.97354
724	Industrial Park	IP0724	North China	Hebei		39.7652	118.381	39.7578	118.361	39.7782	118.398	0.00170786	0.000610369	2.79808
725	Industrial Park	IP0725	North China	Hebei		39.921	118.677	39.9111	118.654	39.9381	118.698	0.000943538	0.00205602	0.458915
726	Industrial Park	IP0726	North China	Hebei		38.6055	117.056	38.6001	117.049	38.6116	117.062	0.000949457	7.34574e-05	12.9253
727	Industrial Hotspot	IH0727	North China	Hebei		39.4079	115.628	39.4079	115.628	39.4079	115.628	0.00130281	0.000148253	8.78776
728	Industrial Hotspot	IH0728	North China	Henan		35.3132	113.335	35.3132	113.335	35.3132	113.335	0.00152507	0.000114887	13.2746
729	Industrial Hotspot	IH0729	North China	Inner Mongolia		40.9019	110.337	40.9019	110.337	40.9019	110.337	0.00018868	1.30646e-05	14.4422
730	Industrial Park	IP0730	Northeast China	Jilin		43.2023	124.338	43.1933	124.327	43.2136	124.356	0.000813274	0.000656748	1.23833
731	Industrial Park	IP0731	North China	Liaoning		42.0851	121.75	42.0782	121.738	42.093	121.761	0.00036166	0.000240319	1.50492
732	Industrial Park	IP0732	North China	Liaoning		41.9749	121.68	41.9707	121.664	41.9811	121.687	3.01722e-05	0.000313137	0.0963544
733	Industrial Hotspot	IH0733	North China	Shanxi		37.1698	111.726	37.1698	111.726	37.1698	111.726	0.00171031	0.000332303	5.14684
734	Industrial Park	IP0734	North China	Jiangsu		34.5011	117.304	34.4961	117.293	34.5061	117.315	0.0010358	0.00028514	3.63259
735	Industrial Park	IP0735	Northwest China	Xinjiang		43.1609	88.8422	43.1538	88.8287	43.1715	88.8557	0.000210343	2.96132e-05	7.10303
736	Industrial Park	IP0736	North China	Liaoning		40.6237	122.371	40.6129	122.361	40.6352	122.382	0.00127144	0.000922647	1.37804
737	Industrial Hotspot	IH0737	North China	Shanxi		35.5792	111.668	35.5792	111.668	35.5792	111.668	0.000580858	0.000307417	1.88948
738	Industrial Park	IP0738	North China	Gansu		38.493	102.216	38.4815	102.19	38.5111	102.248	0.000136121	0.000266813	0.510171
739	Industrial Hotspot	IH0739	North China	Qinghai		36.4487	102.464	36.4487	102.464	36.4487	102.464	0.00051532	4.41415e-05	11.6743
740	Industrial Hotspot	IH0740	North China	Gansu		35.7537	103.585	35.7537	103.585	35.7537	103.585	0.000235443	5.79854e-06	40.6038
741	Industrial Park	IP0741	North China	Qinghai		36.6681	101.669	36.6647	101.654	36.6739	101.685	0.000416745	0.000371662	1.1213
742	Industrial Hotspot	IH0742	North China	Qinghai		36.4953	102.274	36.4953	102.274	36.4953	102.274	0.000486253	2.27647e-05	21.3599
743	Industrial Park	IP0743	North China	Gansu		36.4976	103.907	36.4931	103.899	36.5043	103.918	0.000493286	3.21086e-05	15.3631
744	Industrial Hotspot	IH0744	Northeast China	Jilin		44.5661	124.307	44.5661	124.307	44.5661	124.307	0.000451292	2.06637e-05	21.8398
745	Industrial Hotspot	IH0745	Northeast China	Jilin	Mingcheng	43.194	126.002	43.1877	125.992	43.2021	126.012	0.000541516	3.28e-05	16.5096
746	Industrial Park	IP0746	North China	Ningxia		38.9255	106.444	38.8892	106.413	38.9619	106.497	0.000475396	0.000228163	2.08358
747	Industrial Park	IP0747	North China	Shaanxi		39.0523	110.667	39.0438	110.659	39.0655	110.675	0.00068303	0.000103044	6.62855
748	Industrial Park	IP0748	North China	Ningxia		39.0446	106.94	39.0293	106.916	39.0662	106.966	0.000317166	0.000415245	0.763804
749	Industrial Park	IP0749	North China	Ningxia		37.4163	105.463	37.4101	105.449	37.4335	105.474	0.000290629	4.50969e-05	6.44453
750	Industrial Hotspot	IH0750	North China	Ningxia	Daguohe	37.6286	105.237	37.6059	105.229	37.6445	105.244	0.000288562	0.000237533	1.21483
751	Industrial Hotspot	IH0751	North China	Gansu		37.4424	102.892	37.4424	102.892	37.4424	102.892	0.000148782	6.62045e-06	22.473
752	Industrial Park	IP0752	North China	Shandong		36.9968	119.179	36.9848	119.16	37.013	119.204	0.000661686	0.00019499	3.39343
753	Industrial Park	IP0753	Northeast China	Heilongjiang	Daqing	46.4444	125.219	46.4279	125.202	46.459	125.237	0.000544146	0.000418978	1.29875
754	Industrial Hotspot	IH0754	North China	Liaoning		41.4209	119.817	41.4209	119.817	41.4209	119.817	0.000425355	2.00023e-05	21.2653
755	Industrial Hotspot	IH0755	North China	Shanxi		38.0025	112.011	38.0025	112.011	38.0025	112.011	0.000677468	2.87151e-05	23.5927
756	Industrial Park	IP0756	North China	Hebei		39.4956	118.21	39.4871	118.204	39.5058	118.217	0.00139002	0.000906993	1.53256
757	Industrial Park	IP0757	North China	Hebei		38.7381	116.128	38.7296	116.114	38.7529	116.145	0.00156841	0.000915917	1.7124
758	Industrial Park	IP0758	North China	Shanxi		37.9309	112.089	37.9222	112.079	37.9376	112.121	0.00100807	5.685e-05	17.7321
759	Industrial Park	IP0759	North China	Inner Mongolia		40.5804	109.788	40.566	109.773	40.6049	109.803	0.000694099	0.00479196	0.144847
760	Industrial Hotspot	IH0760	Southwest China	Yunnan		25.2084	103.046	25.2084	103.046	25.2084	103.046	0.00023133	2.34494e-05	9.86505
761	Industrial Hotspot	IH0761	Northeast China	Heilongjiang		45.5882	124.32	45.5882	124.32	45.5882	124.32	0.000300302	0.000148612	2.02071
762	Industrial Park	IP0762	North China	Liaoning		40.695	122.551	40.6859	122.545	40.7038	122.563	0.00150389	0.000413211	3.63952
763	Industrial Park	IP0763	North China	Liaoning		41.0131	123.72	41.0098	123.709	41.0175	123.736	0.000338472	5.00047e-05	6.7688
764	Industrial Hotspot	IH0764	North China	Shanxi		37.851	110.976	37.851	110.976	37.851	110.976	0.000588977	1.15213e-05	51.1205
765	Industrial Hotspot	IH0765	North China	Hebei		40.1985	118.264	40.1985	118.264	40.1985	118.264	0.000901745	0.000417566	2.15953
766	Industrial Hotspot	IH0766	North China	Shandong		35.6143	117.441	35.6143	117.441	35.6143	117.441	0.00096736	0.000105653	9.156
767	Industrial Park	IP0767	North China	Jiangsu		34.2166	119.602	34.2083	119.591	34.2256	119.616	0.000584498	0.000135479	4.3143
768	Industrial Hotspot	IH0768	North China	Shandong		35.9595	118.987	35.9595	118.987	35.9595	118.987	0.000738507	8.18451e-05	9.02323
769	Industrial Park	IP0769	East China	Anhui		30.9208	117.772	30.9139	117.764	30.9311	117.777	0.000737502	0.000876802	0.841126
770	Industrial Hotspot	IH0770	East China	Jiangsu		31.4814	119.233	31.4814	119.233	31.4814	119.233	0.000970698	0.000115952	8.37156
771	Industrial Hotspot	IH0771	East China	Anhui		32.7822	117.175	32.7822	117.175	32.7822	117.175	0.000968842	9.35498e-05	10.3564
772	Industrial Park	IP0772	Northeast China	Heilongjiang		45.7886	131.057	45.7823	131.045	45.7998	131.061	0.000275401	0.000148663	1.85252
773	Industrial Hotspot	IH0773	Northeast China	Heilongjiang		44.1061	129.203	44.1061	129.203	44.1061	129.203	9.04664e-05	0.000121661	0.743595
774	Industrial Hotspot	IH0774	Northeast China	Heilongjiang		46.4179	123.416	46.4179	123.416	46.4179	123.416	0.000141601	5.97789e-05	2.36875
775	Industrial Hotspot	IH0775	North China	Hebei		40.1414	115.267	40.1414	115.267	40.1414	115.267	0.0012042	8.44591e-06	142.578
776	Industrial Hotspot	IH0776	North China	Gansu	Hailuo	35.4738	106.686	35.4642	106.678	35.4843	106.698	0.000318097	1.03e-05	30.8832
777	Industrial Park	IP0777	North China	Gansu	Lanxing	36.8169	103.213	36.8065	103.206	36.8331	103.221	0.000272241	2.84e-05	9.58595
778	Industrial Hotspot	IH0778	North China	Gansu		35.7564	104.139	35.7564	104.139	35.7564	104.139	0.000233348	3.7453e-05	6.23041
779	Industrial Park	IP0779	North China	Ningxia		37.56	105.427	37.5534	105.408	37.5651	105.442	0.000283425	7.579e-05	3.73961
780	Industrial Park	IP0780	East China	Shanghai		31.2574	121.74	31.2426	121.734	31.2656	121.755	0.000687592	0.00159177	0.431966
781	Industrial Park	IP0781	North China	Liaoning		41.529	120.371	41.5163	120.355	41.5364	120.386	0.000639258	0.000574799	1.11214
782	Industrial Park	IP0782	North China	Inner Mongolia		39.9169	106.785	39.9016	106.762	39.9316	106.812	0.00105064	5.7744e-05	18.1948
783	Industrial Park	IP0783	North China	Shaanxi		39.0851	110.765	39.0819	110.753	39.0922	110.782	0.000578811	0.000103327	5.60172
784	Industrial Hotspot	IH0784	North China	Inner Mongolia		40.6638	109.698	40.6638	109.698	40.6733	109.723	0.00193812	0.000485909	3.98865
785	Industrial Park	IP0785	North China	Inner Mongolia		39.3306	110.157	39.3219	110.147	39.3406	110.169	0.000836504	0.000225273	3.71329
786	Industrial Park	IP0786	North China	Shaanxi		39.0689	111.001	39.0645	110.995	39.0748	111.009	0.000574514	0.000340401	1.68775
787	Industrial Park	IP0787	North China	Shanxi		36.7277	111.752	36.7189	111.736	36.7374	111.769	0.00100171	0.000196311	5.10269
788	Industrial Hotspot	IH0788	Southwest China	Guizhou		25.1431	105.109	25.1431	105.109	25.1431	105.109	0.000159689	6.0565e-05	2.63665
789	Industrial Hotspot	IH0789	Northwest China	Xinjiang	Rundajianeng	43.6921	95.0003	43.6809	94.9586	43.7138	95.0373	0.000314986	6.74e-06	46.7338
790	Industrial Park	IP0790	North China	Inner Mongolia		40.9984	112.154	40.9887	112.139	41.0098	112.164	0.000583154	2.73691e-05	21.307
791	Industrial Hotspot	IH0791	North China	Hebei		39.3523	114.842	39.3523	114.842	39.3523	114.842	0.000668764	3.27373e-05	20.4282
792	Industrial Hotspot	IH0792	North China	Inner Mongolia		41.0856	110.027	41.0856	110.027	41.0856	110.027	0.000513576	0.000219207	2.34289
793	Industrial Park	IP0793	North China	Hebei		39.2189	118.093	39.2079	118.073	39.2369	118.119	0.00101306	3.54545e-05	28.5735
794	Industrial Park	IP0794	North China	Hebei		38.1355	114.323	38.1293	114.312	38.1435	114.337	0.00222133	0.0018447	1.20417
795	Industrial Park	IP0795	Southwest China	Guizhou		26.5495	105.019	26.5401	105.014	26.556	105.028	0.000291783	8.38992e-05	3.47779
796	Industrial Hotspot	IH0796	South China	Guangxi		23.5156	109.707	23.5156	109.707	23.5156	109.707	0.000387577	3.86456e-05	10.029
797	Industrial Park	IP0797	Northwest China	Qinghai	Geermu	36.7838	95.2369	36.7767	95.2154	36.7954	95.26	8.23e-05	3.01e-07	273.422
798	Industrial Hotspot	IH0798	North China	Inner Mongolia		41.9264	118.728	41.9264	118.728	41.9264	118.728	8.59713e-05	1.58455e-05	5.42558
799	Industrial Hotspot	IH0799	Northwest China	Gansu	Chengbei	40.5591	95.7633	40.5527	95.7388	40.5668	95.7943	8.47e-05	2.28e-06	37.1491
800	Industrial Hotspot	IH0800	Northwest China	Xinjiang	Zeketai	43.7091	83.2812	43.6997	83.2699	43.7209	83.305	0.000235731	2.14e-05	11.0155
801	Industrial Park	IP0801	North China	Gansu		36.7978	103.681	36.7927	103.672	36.807	103.692	0.000251222	1.27765e-05	19.6627
802	Industrial Park	IP0802	Northwest China	Xinjiang		39.6477	75.9435	39.6444	75.8919	39.6534	75.9661	0.000147377	7.21108e-06	20.4376
803	Industrial Park	IP0803	North China	Inner Mongolia		40.4003	113.16	40.386	113.13	40.4119	113.209	0.000669844	0.000416541	1.60811
804	Industrial Park	IP0804	North China	Liaoning		40.6611	122.601	40.6559	122.594	40.6696	122.613	0.00103483	0.000413211	2.50437
805	Industrial Park	IP0805	North China	Shandong		36.8851	118.115	36.8779	118.077	36.8903	118.148	0.00140151	0.00144974	0.966736
806	Industrial Park	IP0806	North China	Shandong		36.7544	118.055	36.7502	118.047	36.7644	118.071	0.00119534	0.00127707	0.936008
807	Industrial Hotspot	IH0807	East China	Hubei		30.8653	111.642	30.8653	111.642	30.8653	111.642	0.000654467	2.02202e-05	32.367
808	Industrial Hotspot	IH0808	East China	Hunan		29.6257	111.308	29.6257	111.308	29.6257	111.308	0.000620685	8.51281e-05	7.29119
809	Industrial Park	IP0809	East China	Hubei		30.4314	114.967	30.4185	114.946	30.4476	114.984	0.000853277	0.000425835	2.00377
810	Industrial Hotspot	IH0810	East China	Zhejiang		29.1876	119.163	29.1876	119.163	29.1876	119.163	0.000586494	0.000125088	4.68867
811	Industrial Hotspot	IH0811	East China	Hunan		27.402	111.986	27.402	111.986	27.402	111.986	0.000756987	5.91659e-05	12.7943
812	Industrial Hotspot	IH0812	East China	Hunan		27.8349	111.172	27.8349	111.172	27.8349	111.172	0.000460019	6.32754e-06	72.7011
813	Industrial Park	IP0813	South China	Fujian		24.6341	117.608	24.6285	117.597	24.6427	117.618	0.000490173	0.000325115	1.50769
814	Industrial Park	IP0814	North China	Shaanxi		39.2168	110.534	39.2009	110.522	39.2398	110.547	0.00067136	0.000103044	6.5153
815	Industrial Park	IP0815	North China	Ningxia		38.7251	106.285	38.7074	106.268	38.7467	106.319	0.00043363	0.000393836	1.10104
816	Industrial Hotspot	IH0816	Southwest China	Guizhou		26.5728	104.941	26.5728	104.941	26.5728	104.941	0.000276793	0.000526937	0.525286
817	Industrial Hotspot	IH0817	Southwest China	Guizhou	Jiangtian	27.2475	105.387	27.2475	105.387	27.2475	105.387	0.000415118	3.25e-05	12.7729
818	Industrial Hotspot	IH0818	East China	Jiangsu		31.9998	119.023	31.9998	119.023	31.9998	119.023	0.00105825	0.000175023	6.04632
819	Industrial Park	IP0819	North China	Shandong		35.1771	118.262	35.1643	118.248	35.1897	118.279	0.00124082	0.000945419	1.31245
820	Industrial Park	IP0820	North China	Shaanxi		39.2174	110.419	39.2081	110.393	39.2295	110.438	0.000639156	0.000109373	5.84382
821	Industrial Hotspot	IH0821	North China	Shaanxi		39.2489	111.149	39.2489	111.149	39.2489	111.149	0.000557421	0.000448997	1.24148
822	Industrial Hotspot	IH0822	Northwest China	Xinjiang		39.5247	76.0588	39.5247	76.0588	39.5247	76.0588	0.000151706	6.78975e-05	2.23434
823	Industrial Hotspot	IH0823	North China	Inner Mongolia		40.9862	113.296	40.9862	113.296	40.9862	113.296	0.000303785	1.97131e-05	15.4103
824	Industrial Park	IP0824	North China	Shanxi		35.6999	110.745	35.6924	110.74	35.7087	110.75	0.00119359	0.000581253	2.05347
825	Industrial Hotspot	IH0825	North China	Hebei		36.3546	114.095	36.3546	114.095	36.3546	114.095	0.00183855	0.000471072	3.90292
826	Industrial Park	IP0826	North China	Shaanxi		39.0177	110.67	39.0118	110.665	39.0302	110.682	0.000576224	0.000103044	5.59203
827	Industrial Park	IP0827	North China	Anhui		33.8846	116.73	33.8775	116.715	33.8923	116.75	0.000993079	0.000223667	4.43999
828	Industrial Hotspot	IH0828	North China	Jiangsu		34.8642	119.174	34.8642	119.174	34.8642	119.174	0.000842503	0.000171178	4.9218
829	Industrial Park	IP0829	North China	Inner Mongolia		41.3642	110.99	41.3582	110.97	41.3751	111.005	0.000106307	3.74816e-05	2.83624
830	Industrial Hotspot	IH0830	North China	Henan		36.103	114.12	36.103	114.12	36.103	114.12	0.00125463	0.000182242	6.88439
831	Industrial Hotspot	IH0831	North China	Shanxi		36.053	111.207	36.053	111.207	36.053	111.207	0.000888219	3.14994e-05	28.198
832	Industrial Park	IP0832	North China	Shandong		36.9257	117.695	36.9181	117.685	36.9333	117.705	0.00207657	0.00041452	5.00957
833	Industrial Park	IP0833	North China	Shanxi		36.3271	113.161	36.3212	113.148	36.336	113.174	0.000927699	0.000692321	1.33998
834	Industrial Park	IP0834	North China	Shandong		36.9326	118.79	36.9217	118.766	36.9532	118.81	0.000917092	0.000424736	2.1592
835	Industrial Park	IP0835	North China	Henan		33.8796	112.898	33.8719	112.892	33.8881	112.908	0.00125725	7.57037e-05	16.6075
836	Industrial Park	IP0836	Northwest China	Xinjiang		43.5259	81.9538	43.5189	81.9341	43.5325	81.9699	0.000137714	2.61092e-05	5.27453
837	Industrial Park	IP0837	Northwest China	Xinjiang		44.1344	87.7766	44.1212	87.7404	44.1582	87.8214	0.00133165	0.000325265	4.09403
838	Industrial Hotspot	IH0838	North China	Shandong		36.2962	120.331	36.2962	120.331	36.2962	120.331	0.00119645	0.00157821	0.758109
839	Industrial Hotspot	IH0839	North China	Hebei		39.1123	118.497	39.1123	118.497	39.1123	118.497	0.00119753	9.50065e-06	126.047
840	Industrial Park	IP0840	North China	Hebei		39.6991	118.456	39.6915	118.441	39.7032	118.473	0.00168444	0.00161471	1.04318
841	Industrial Hotspot	IH0841	North China	Hebei		41.1767	117.971	41.1767	117.971	41.1767	117.971	0.000589539	3.46737e-05	17.0025
842	Industrial Hotspot	IH0842	North China	Hebei		40.7841	118.261	40.7841	118.261	40.7841	118.261	0.000179053	6.69444e-05	2.67466
843	Industrial Hotspot	IH0843	North China	Hebei		39.3261	115.442	39.3261	115.442	39.3261	115.442	0.00126072	2.43257e-05	51.8267
844	Industrial Park	IP0844	North China	Hebei		39.0134	116.393	39.0051	116.385	39.0251	116.403	0.00122352	0.000505804	2.41896
845	Industrial Hotspot	IH0845	Northwest China	Xinjiang		41.5742	82.9057	41.5742	82.9057	41.5742	82.9057	0.000114935	0.000310425	0.370252
846	Industrial Hotspot	IH0846	North China	Liaoning		42.024	121.736	42.024	121.736	42.024	121.736	2.72302e-05	0.000333514	0.0816464
847	Industrial Park	IP0847	Northwest China	Tibet		29.6601	90.9058	29.655	90.8961	29.6686	90.9183	0.000122801	1.31084e-05	9.36809
848	Industrial Hotspot	IH0848	North China	Shanxi		37.6106	112.372	37.6106	112.372	37.6106	112.372	0.000906996	0.000385263	2.35423
849	Industrial Hotspot	IH0849	North China	Shanxi		37.0853	111.5	37.0853	111.5	37.0853	111.5	0.00123752	0.000174472	7.0929
850	Industrial Park	IP0850	North China	Shanxi		35.6091	110.654	35.6012	110.646	35.6187	110.663	0.00115795	0.000679202	1.70487
851	Industrial Hotspot	IH0851	East China	Hubei		30.3872	114.079	30.3872	114.079	30.3872	114.079	0.00142358	0.000109563	12.9933
852	Industrial Park	IP0852	East China	Anhui		31.2496	118.187	31.2437	118.176	31.2579	118.198	0.00117615	0.000131759	8.92651
853	Industrial Hotspot	IH0853	East China	Jiangxi		29.8103	115.579	29.8103	115.579	29.8103	115.579	0.000609744	0.00015211	4.00857
854	Industrial Hotspot	IH0854	East China	Jiangxi		27.4072	116.67	27.4072	116.67	27.4072	116.67	0.000340372	1.77541e-05	19.1715
855	Industrial Park	IP0855	Southwest China	Chongqing		29.95	106.322	29.9467	106.311	29.9559	106.331	0.00170388	0.000325563	5.23364
856	Industrial Hotspot	IH0856	Southwest China	Sichuan		31.7916	104.648	31.7916	104.648	31.7916	104.648	0.000476536	3.00399e-05	15.8634
857	Industrial Park	IP0857	East China	Hubei		30.6426	114.534	30.6293	114.522	30.657	114.544	0.00102546	0.000160161	6.40266
858	Industrial Hotspot	IH0858	Southwest China	Yunnan		26.0083	101.713	26.0083	101.713	26.0083	101.713	0.000169504	5.79173e-06	29.2665
859	Industrial Park	IP0859	Northwest China	Xinjiang		41.3186	83.8474	41.311	83.842	41.3252	83.8537	7.5999e-05	2.0692e-06	36.7288
860	Industrial Hotspot	IH0860	East China	Hubei		30.5951	114.555	30.5951	114.555	30.5951	114.555	0.00137898	0.000160161	8.60998
861	Industrial Park	IP0861	East China	Jiangxi		27.6185	113.676	27.6117	113.668	27.6264	113.686	0.000853532	0.000286254	2.98173
862	Industrial Hotspot	IH0862	Southwest China	Sichuan		30.8605	106.994	30.8605	106.994	30.8605	106.994	0.000771183	7.04738e-05	10.9428
863	Industrial Park	IP0863	North China	Tianjin		39.1482	117.482	39.1446	117.471	39.1517	117.495	0.0015725	0.00210229	0.747995
864	Industrial Hotspot	IH0864	North China	Ningxia		37.8162	106.137	37.8162	106.137	37.8162	106.137	0.000321904	0.000676922	0.47554
865	Industrial Hotspot	IH0865	North China	Henan		36.046	114.001	36.046	114.001	36.046	114.001	0.00118657	0.000250681	4.73336
866	Industrial Park	IP0866	North China	Henan		36.1517	114.097	36.1454	114.09	36.1591	114.106	0.00141143	0.000182242	7.74482
867	Industrial Park	IP0867	North China	Shanxi		36.2918	111.935	36.2885	111.931	36.2989	111.944	0.000701458	9.93772e-05	7.05853
868	Industrial Hotspot	IH0868	North China	Shanxi		36.4067	113.088	36.4067	113.088	36.4067	113.088	0.00106898	0.000692321	1.54406
869	Industrial Hotspot	IH0869	North China	Gansu		36.3722	103.896	36.3722	103.896	36.3722	103.896	0.000436752	4.76362e-05	9.16849
870	Industrial Hotspot	IH0870	North China	Ningxia		37.3563	106.585	37.3563	106.585	37.3563	106.585	0.000225277	1.8826e-05	11.9662
871	Industrial Hotspot	IH0871	East China	Hubei		32.7521	110.841	32.7521	110.841	32.7521	110.841	0.000548436	0.000220219	2.49041
872	Industrial Hotspot	IH0872	East China	Hubei		30.1935	115.059	30.1935	115.059	30.1935	115.059	0.00113658	0.000402118	2.82648
873	Industrial Hotspot	IH0873	East China	Guizhou		27.7181	109.136	27.7181	109.136	27.7181	109.136	0.000336263	9.31906e-05	3.60834
874	Industrial Hotspot	IH0874	East China	Hunan		27.1234	113.112	27.1234	113.112	27.1234	113.112	0.000530585	1.38424e-05	38.3305
875	Industrial Hotspot	IH0875	South China	Guangdong		23.1301	111.769	23.1301	111.769	23.1301	111.769	0.000555955	2.24544e-05	24.7593
876	Industrial Hotspot	IH0876	South China	Guangxi		22.5492	110.24	22.5492	110.24	22.5492	110.24	0.000247162	0.000184657	1.33849
877	Industrial Hotspot	IH0877	South China	Guangdong		24.1033	112.773	24.1033	112.773	24.1033	112.773	0.000436188	1.32566e-05	32.9035
878	Industrial Hotspot	IH0878	East China	Jiangxi		29.8042	115.728	29.8042	115.728	29.8042	115.728	0.000607588	0.00014888	4.08105
879	Industrial Hotspot	IH0879	North China	Tianjin		39.3668	117.795	39.3668	117.795	39.3668	117.795	0.00174933	0.000723153	2.41903
880	Industrial Hotspot	IH0880	North China	Shanxi		39.8187	114.369	39.8187	114.369	39.8187	114.369	0.000519448	3.26681e-05	15.9008
881	Industrial Hotspot	IH0881	North China	Shandong		37.5715	118.497	37.5715	118.497	37.5715	118.497	0.000933816	0.000182846	5.10711
882	Industrial Park	IP0882	North China	Henan		36.1609	114.296	36.1533	114.289	36.1698	114.306	0.00153124	0.000576035	2.65824
883	Industrial Park	IP0883	East China	Anhui		31.063	117.957	31.0598	117.948	31.0719	117.971	0.0010156	6.18316e-05	16.4252
884	Industrial Hotspot	IH0884	East China	Anhui		32.7006	117.336	32.7006	117.336	32.7006	117.336	0.000767619	1.86298e-05	41.2038
885	Industrial Hotspot	IH0885	East China	Jiangxi		29.9253	116.566	29.9253	116.566	29.9253	116.566	0.000697413	4.38981e-05	15.8871
886	Industrial Park	IP0886	East China	Hunan		28.1796	113.306	28.1691	113.294	28.1927	113.323	0.000846286	0.000194736	4.34581
887	Industrial Park	IP0887	East China	Jiangxi		27.997	115.619	27.9919	115.609	28.0111	115.621	0.000510428	9.3575e-05	5.45475
888	Industrial Hotspot	IH0888	South China	Guangdong		23.4414	112.873	23.4414	112.873	23.4414	112.873	0.000881069	0.000105301	8.36715
889	Industrial Park	IP0889	East China	Jiangsu		31.9201	121.832	31.9151	121.824	31.9266	121.84	0.000536137	5.65348e-05	9.48332
890	Industrial Hotspot	IH0890	Northeast China	Heilongjiang		46.7547	124.963	46.7547	124.963	46.7547	124.963	0.000313395	0.000761294	0.411661
891	Industrial Hotspot	IH0891	East China	Fujian		27.3194	118.133	27.3194	118.133	27.3194	118.133	0.000133068	4.85114e-05	2.74302
892	Industrial Hotspot	IH0892	East China	Fujian		26.6089	118.011	26.6089	118.011	26.6089	118.011	0.000139459	0.000106545	1.30891
893	Industrial Park	IP0893	North China	Hebei		40.6216	118.494	40.6182	118.483	40.6265	118.512	0.000885115	0.000217062	4.0777
894	Industrial Park	IP0894	North China	Hebei		39.4951	118.713	39.4834	118.693	39.5066	118.722	0.000827714	0.000207897	3.98137
895	Industrial Park	IP0895	North China	Hebei		39.5173	118.08	39.5021	118.056	39.5329	118.094	0.0016719	0.00416486	0.401431
896	Industrial Park	IP0896	North China	Ningxia		38.5129	105.98	38.5039	105.975	38.5198	105.987	0.000713083	1.25779e-05	56.6932
897	Industrial Hotspot	IH0897	South China	Fujian		24.9261	117.113	24.9261	117.113	24.9261	117.113	0.000156312	1.72108e-05	9.08218
898	Industrial Hotspot	IH0898	Northwest China	Xinjiang		41.552	83.5572	41.552	83.5572	41.552	83.5572	8.08924e-05	1.20343e-05	6.72184
899	Industrial Hotspot	IH0899	North China	Shandong		37.5053	118.407	37.5053	118.407	37.5053	118.407	0.00100145	0.000345311	2.90013
900	Industrial Hotspot	IH0900	North China	Shandong		37.2105	118.706	37.2105	118.706	37.2105	118.706	0.000955843	0.000356272	2.68291
901	Industrial Hotspot	IH0901	North China	Shanxi		39.9835	113.116	39.9835	113.116	39.9835	113.116	0.00129573	0.000611167	2.12009
902	Industrial Hotspot	IH0902	North China	Tianjin		39.2872	118.001	39.2872	118.001	39.2872	118.001	0.000901073	0.000380256	2.36965
903	Industrial Hotspot	IH0903	North China	Shaanxi		34.5506	107.991	34.5506	107.991	34.5506	107.991	0.000871022	2.42221e-05	35.9598
904	Industrial Hotspot	IH0904	North China	Shandong		36.6369	117.75	36.6369	117.75	36.6369	117.75	0.00135549	0.000830055	1.63301
905	Industrial Park	IP0905	North China	Shandong		35.8555	117.152	35.85	117.134	35.8618	117.162	0.000905574	0.000139011	6.51443
906	Industrial Hotspot	IH0906	East China	Jiangsu		31.8338	120.759	31.8338	120.759	31.8338	120.759	0.0013877	0.000571665	2.42747
907	Industrial Hotspot	IH0907	East China	Hubei		30.2593	114.86	30.2593	114.86	30.2593	114.86	0.00133858	0.000429554	3.1162
908	Industrial Park	IP0908	North China	Inner Mongolia		41.0321	111.466	41.0234	111.457	41.0422	111.478	0.000452807	9.87373e-05	4.58598
909	Industrial Hotspot	IH0909	North China	Ningxia		37.8764	105.944	37.8764	105.944	37.8764	105.944	0.000355881	0.000263096	1.35266
910	Industrial Hotspot	IH0910	North China	Shanxi		37.2125	112.129	37.2125	112.129	37.2125	112.129	0.00137448	0.000317071	4.33494
911	Industrial Park	IP0911	North China	Qinghai		36.6871	101.875	36.6829	101.871	36.6968	101.88	0.000251364	0.000680398	0.369437
912	Industrial Hotspot	IH0912	North China	Liaoning		41.8274	124.108	41.8274	124.108	41.8274	124.108	0	0.0004741	0
913	Industrial Hotspot	IH0913	North China	Shandong		35.2123	117.027	35.2123	117.027	35.2123	117.027	0.00111657	0.000632812	1.76445
914	Industrial Hotspot	IH0914	North China	Shandong		36.7599	118.406	36.7599	118.406	36.7599	118.406	0.00112437	0.000701974	1.60172
915	Industrial Hotspot	IH0915	North China	Jiangsu		34.4054	117.356	34.4054	117.356	34.4054	117.356	0.00115187	0.000308583	3.73276
916	Industrial Hotspot	IH0916	East China	Jiangxi		29.121	117.335	29.121	117.335	29.121	117.335	0.000421584	1.52762e-05	27.5975
917	Industrial Hotspot	IH0917	North China	Tianjin		39.2598	117.396	39.2598	117.396	39.2598	117.396	0.00142566	0.000315539	4.51817
918	Industrial Hotspot	IH0918	North China	Inner Mongolia		40.307	110.056	40.307	110.056	40.307	110.056	0.000587157	0.000653395	0.898625
919	Industrial Park	IP0919	North China	Hebei		36.8544	114.548	36.8489	114.539	36.8643	114.551	0.00130505	0.000585754	2.22798
920	Industrial Hotspot	IH0920	North China	Inner Mongolia		40.9096	106.847	40.9096	106.847	40.9096	106.852	0.000176089	8.35213e-05	2.10831
921	Industrial Park	IP0921	North China	Inner Mongolia		39.829	106.788	39.8132	106.78	39.8482	106.795	0.000983625	5.84015e-05	16.8425
922	Industrial Hotspot	IH0922	North China	Shandong		36.5579	116.856	36.5579	116.856	36.5579	116.856	0.00138166	0.00154019	0.897072
923	Industrial Hotspot	IH0923	North China	Shandong		36.5788	116.918	36.5788	116.918	36.5788	116.918	0.00139127	0.00154019	0.903307
924	Industrial Park	IP0924	North China	Shanxi		37.3853	111.154	37.3643	111.146	37.4032	111.169	0.000939171	0.000256331	3.6639
925	Industrial Hotspot	IH0925	North China	Gansu		34.6216	105.398	34.6216	105.398	34.6216	105.398	0.000199391	4.15015e-05	4.80444
926	Industrial Hotspot	IH0926	North China	Gansu		34.8446	104.424	34.8446	104.424	34.8446	104.424	0.000120776	1.32958e-05	9.08377
927	Industrial Hotspot	IH0927	Northwest China	Xinjiang		41.7632	83.2731	41.7632	83.2731	41.7632	83.2731	0.000149459	1.66163e-06	89.9476
928	Industrial Hotspot	IH0928	Northwest China	Xinjiang	Luopu	36.9987	80.1949	36.9987	80.1949	36.9987	80.1949	0.000120062	1.67e-07	718.934
929	Industrial Hotspot	IH0929	East China	Jiangsu		32.7469	119.434	32.7469	119.434	32.7469	119.434	0.000772437	0.00013663	5.6535
930	Industrial Hotspot	IH0930	North China	Liaoning		39.5819	121.433	39.5819	121.433	39.5819	121.433	0.000356725	3.83747e-05	9.29584
931	Industrial Hotspot	IH0931	East China	Zhejiang		29.1664	119.129	29.1664	119.129	29.1664	119.129	0.000699338	0.000125088	5.59079
932	Industrial Hotspot	IH0932	North China	Inner Mongolia		41.4641	119.007	41.4641	119.007	41.4641	119.007	0.000168572	2.48076e-05	6.79518
933	Industrial Hotspot	IH0933	North China	Shanxi		40.1841	113.305	40.1841	113.305	40.1841	113.305	0.000624158	0.00173206	0.360355
934	Industrial Park	IP0934	North China	Inner Mongolia		40.967	110.091	40.9606	110.077	40.9746	110.1	0.000298549	1.79601e-05	16.6229
935	Industrial Hotspot	IH0935	North China	Inner Mongolia		39.5765	110.571	39.5765	110.571	39.5765	110.571	0.000670512	0.000108961	6.15371
936	Industrial Hotspot	IH0936	North China	Inner Mongolia		40.3659	109.959	40.3659	109.959	40.3659	109.959	0.00101153	0.000398944	2.53551
937	Industrial Hotspot	IH0937	North China	Shandong		37.381	121.163	37.381	121.163	37.381	121.163	0.00049531	0.000171149	2.89402
938	Industrial Hotspot	IH0938	North China	Inner Mongolia		40.6521	110.395	40.6521	110.395	40.6521	110.395	0.000782827	0.000262284	2.98466
939	Industrial Hotspot	IH0939	North China	Inner Mongolia		39.9224	111.706	39.9224	111.706	39.9224	111.706	0.000371061	0.000113093	3.28104
940	Industrial Park	IP0940	North China	Shaanxi		34.9059	108.99	34.8959	108.98	34.9159	109	0.000986781	8.50175e-05	11.6068
941	Industrial Hotspot	IH0941	North China	Shaanxi		35.0291	109.025	35.0291	109.025	35.0291	109.025	0.00089364	0.00023586	3.78886
942	Industrial Hotspot	IH0942	North China	Shaanxi		34.9442	109.017	34.9442	109.017	34.9442	109.017	0.000798884	7.23005e-05	11.0495
943	Industrial Hotspot	IH0943	Northwest China	Xinjiang		43.7854	87.3917	43.7854	87.3917	43.7854	87.3917	0.00276	0.000589791	4.67963
944	Industrial Park	IP0944	North China	Shandong		37.4205	118.365	37.4046	118.339	37.4314	118.377	0.00104962	0.00129808	0.808598
945	Industrial Park	IP0945	North China	Qinghai		36.2739	102.96	36.2653	102.953	36.2785	102.972	0.000445798	0.000193112	2.30849
946	Industrial Park	IP0946	North China	Inner Mongolia		42.2132	116.573	42.2077	116.562	42.2195	116.587	0.00181316	6.07156e-05	29.8632
947	Industrial Hotspot	IH0947	North China	Liaoning		41.4553	119.835	41.4553	119.835	41.4553	119.835	0.000316142	2.00023e-05	15.8052
948	Industrial Hotspot	IH0948	North China	Inner Mongolia		41.9675	119.18	41.9675	119.18	41.9675	119.18	0.000327812	5.89158e-05	5.56408
949	Industrial Hotspot	IH0949	North China	Shandong		36.4286	118.397	36.4286	118.397	36.4286	118.397	0.00103465	3.86287e-05	26.7846
950	Industrial Hotspot	IH0950	East China	Hunan		29.7017	111.512	29.7017	111.512	29.7017	111.512	0.000593281	3.59065e-05	16.5229
951	Industrial Hotspot	IH0951	East China	Hunan		29.1387	111.614	29.1387	111.614	29.1387	111.614	0.000727516	0.000529664	1.37354
952	Industrial Park	IP0952	East China	Hubei		30.3255	111.492	30.313	111.487	30.3392	111.496	0.000694331	0.000254028	2.73329
953	Industrial Hotspot	IH0953	Southwest China	Sichuan		28.1186	104.557	28.1186	104.557	28.1186	104.557	0.000563988	7.11704e-05	7.92446
954	Industrial Hotspot	IH0954	Southwest China	Chongqing		30.2049	105.87	30.2049	105.87	30.2049	105.87	0.00101757	0.000126395	8.05074
955	Industrial Hotspot	IH0955	Southwest China	Chongqing		29.8484	106.141	29.8484	106.141	29.8484	106.141	0.00157923	0.000149225	10.5829
956	Industrial Hotspot	IH0956	Northwest China	Tibet		30.9478	97.363	30.9478	97.363	30.9478	97.363	4.30793e-05	8.11375e-07	53.0942
957	Industrial Hotspot	IH0957	North China	Hebei		40.0067	119.519	40.0067	119.519	40.0067	119.519	0.00143047	0.000178828	7.99914
958	Industrial Park	IP0958	North China	Hebei		39.7463	118.627	39.7397	118.62	39.7554	118.636	0.00113735	0.000796532	1.42787
959	Industrial Hotspot	IH0959	North China	Shanxi		39.7409	113.004	39.7409	113.004	39.7409	113.004	0.000509042	0.000265436	1.91775
960	Industrial Park	IP0960	North China	Inner Mongolia		40.8601	109.667	40.8553	109.651	40.8667	109.677	0.00104936	1.04261e-05	100.648
961	Industrial Hotspot	IH0961	North China	Shandong		34.718	117.523	34.718	117.523	34.718	117.523	0.000996189	0.000188659	5.28036
962	Industrial Hotspot	IH0962	North China	Shandong		37.3315	117.588	37.3315	117.588	37.3315	117.588	0.00107185	0.000126354	8.4829
963	Industrial Hotspot	IH0963	North China	Shandong		34.5145	117.495	34.5145	117.495	34.5145	117.495	0.000906356	0.000222378	4.07574
964	Industrial Park	IP0964	North China	Shandong		36.9485	117.167	36.9385	117.157	36.9585	117.177	0.00134041	0.000241598	5.54809
965	Industrial Hotspot	IH0965	North China	Shandong		34.8402	117.723	34.8402	117.723	34.8402	117.723	0.00102045	0.000575578	1.77292
966	Industrial Hotspot	IH0966	North China	Shandong		34.9261	117.529	34.9261	117.529	34.9261	117.529	0.000810464	0.000575578	1.40809
967	Industrial Hotspot	IH0967	North China	Shandong		35.4052	117.627	35.4052	117.627	35.4052	117.627	0.000722535	5.34457e-05	13.519
968	Industrial Hotspot	IH0968	North China	Shandong		36.276	116.574	36.276	116.574	36.276	116.574	0.000963493	9.80229e-05	9.82926
969	Industrial Hotspot	IH0969	North China	Shandong		34.6942	117.522	34.6942	117.522	34.6942	117.522	0.000894938	0.000188187	4.75558
970	Industrial Park	IP0970	North China	Shandong		36.1561	116.641	36.1495	116.632	36.1659	116.647	0.000905647	0.000340106	2.66284
971	Industrial Hotspot	IH0971	North China	Anhui		34.1317	117.02	34.1317	117.02	34.1317	117.02	0.000896194	0.000355633	2.51999
972	Industrial Hotspot	IH0972	North China	Shandong		35.94	118.92	35.94	118.92	35.94	118.92	0.00081014	7.49133e-05	10.8144
973	Industrial Hotspot	IH0973	North China	Henan		34.6994	113.108	34.6994	113.108	34.6994	113.108	0.00127506	0.000138533	9.20401
974	Industrial Park	IP0974	North China	Shandong		37.4546	116.229	37.4184	116.187	37.4811	116.267	0.00123936	0.000227439	5.44918
975	Industrial Hotspot	IH0975	East China	Henan		31.9169	114.024	31.9169	114.024	31.9169	114.024	0.000578177	1.26519e-05	45.6987
976	Industrial Park	IP0976	North China	Henan		33.2861	113.474	33.2828	113.457	33.2949	113.501	0.00119684	5.60481e-05	21.3538
977	Industrial Hotspot	IH0977	East China	Anhui		31.7689	117.985	31.7689	117.985	31.7689	117.985	0.000989984	5.95939e-05	16.6122
978	Industrial Hotspot	IH0978	East China	Hunan		28.2242	112.683	28.2242	112.683	28.2242	112.683	0.000870837	0.000308054	2.8269
979	Industrial Park	IP0979	East China	Jiangxi		29.7718	116.274	29.7531	116.25	29.8042	116.309	0.000672171	5.65022e-05	11.8964
980	Industrial Hotspot	IH0980	Southwest China	Yunnan		26.1883	104.125	26.1883	104.125	26.1883	104.125	0.000157051	9.26318e-05	1.69543
981	Industrial Hotspot	IH0981	East China	Hunan		25.7154	112.894	25.7154	112.894	25.7154	112.894	0.000563619	3.49153e-05	16.1425
982	Industrial Hotspot	IH0982	Northwest China	Xinjiang		45.6842	85.2016	45.6842	85.2016	45.6842	85.2016	7.67408e-05	0.000474049	0.161884
983	Industrial Park	IP0983	Northwest China	Xinjiang		44.1419	88.2033	44.1336	88.1942	44.1506	88.2234	0.00112739	9.14358e-05	12.3299
984	Industrial Hotspot	IH0984	North China	Tianjin		39.3235	117.285	39.3235	117.285	39.3235	117.285	0.00172206	7.78092e-05	22.1319
985	Industrial Hotspot	IH0985	North China	Jilin		42.3306	125.186	42.3306	125.186	42.3306	125.186	0.000562098	1.46395e-05	38.3959
986	Industrial Hotspot	IH0986	East China	Hunan		28.2157	111.661	28.2157	111.661	28.2157	111.661	0.000641404	2.02046e-05	31.7454
987	Industrial Hotspot	IH0987	Southwest China	Guizhou		25.1512	105.04	25.1512	105.04	25.1512	105.04	0.000157172	6.0565e-05	2.5951
988	Industrial Hotspot	IH0988	Northwest China	Xinjiang		44.1346	86.1118	44.1346	86.1118	44.1346	86.1118	0.00062527	3.16937e-05	19.7285
989	Industrial Hotspot	IH0989	Southwest China	Chongqing		29.3207	106.39	29.3207	106.39	29.3207	106.39	0.00224118	0.000341088	6.57068
990	Industrial Hotspot	IH0990	Northwest China	Xinjiang		44.7443	82.0634	44.7443	82.0634	44.7443	82.0634	0.000153311	3.2712e-05	4.68669
991	Industrial Park	IP0991	East China	Jiangsu		32.1892	119.544	32.1855	119.536	32.1929	119.556	0.00130649	0.000543378	2.40438
992	Industrial Hotspot	IH0992	Southwest China	Sichuan		29.476	103.533	29.476	103.533	29.476	103.533	0.00080609	6.9727e-05	11.5607
993	Industrial Park	IP0993	Southwest China	Guizhou		26.5213	106.474	26.5117	106.466	26.5399	106.484	0.000406206	0.000161284	2.51859
994	Industrial Hotspot	IH0994	North China	Shandong		36.9569	122.109	36.9569	122.109	36.9569	122.109	0.000502832	8.76036e-05	5.73985
995	Industrial Park	IP0995	North China	Shandong		37.1405	122.443	37.133	122.437	37.1474	122.451	0.000331581	0.00070814	0.468243
996	Industrial Park	IP0996	North China	Gansu		39.8355	97.5609	39.8176	97.5517	39.8525	97.6054	0.000114761	0.000184518	0.621951
997	Industrial Park	IP0997	Northwest China	Xinjiang		43.85	87.3063	43.8319	87.2851	43.8624	87.3446	0.00326698	0.000589791	5.53921
998	Industrial Park	IP0998	North China	Shaanxi		37.6562	108.924	37.6481	108.894	37.6717	108.943	0.000241	0.000247114	0.975257
999	Industrial Hotspot	IH0999	North China	Shaanxi		34.7239	107.026	34.7239	107.026	34.7239	107.026	0.000452727	4.93519e-05	9.17343
1000	Industrial Hotspot	IH1000	North China	Shaanxi		34.537	107.077	34.537	107.077	34.537	107.077	0.000552714	4.93519e-05	11.1994
1001	Industrial Hotspot	IH1001	North China	Shaanxi		34.5385	107.502	34.5385	107.502	34.5385	107.502	0.000677239	6.49874e-05	10.4211
1002	Industrial Park	IP1002	Southwest China	Guizhou		26.2214	105.687	26.2152	105.679	26.2284	105.696	0.000312963	4.98806e-05	6.27425
1003	Industrial Park	IP1003	Northwest China	Xinjiang		44.3607	86.0677	44.3492	86.0347	44.3709	86.0989	0.00131338	0.00127182	1.03268
1004	Industrial Hotspot	IH1004	North China	Tianjin		38.9586	117.362	38.9586	117.362	38.9586	117.362	0.00139043	0.000676532	2.05523
1005	Industrial Park	IP1005	North China	Ningxia		37.9135	105.896	37.9007	105.864	37.9281	105.916	0.000466039	0.000263096	1.77136
1006	Industrial Park	IP1006	North China	Henan		34.8044	111.798	34.7993	111.793	34.8133	111.802	0.000904062	0.000159098	5.68242
1007	Industrial Park	IP1007	South China	Guangdong		21.6924	111.839	21.685	111.833	21.7093	111.844	0.000296792	1.4531e-05	20.4248
1008	Industrial Park	IP1008	Northwest China	Xinjiang		43.9381	87.6693	43.9319	87.6564	43.9526	87.678	0.00223682	0.00476927	0.469006
1009	Industrial Park	IP1009	Northwest China	Xinjiang		41.6837	86.1838	41.6752	86.1681	41.7008	86.2012	0.000193327	0.000889087	0.217444
1010	Industrial Hotspot	IH1010	North China	Liaoning		40.0768	120.01	40.0768	120.01	40.0768	120.01	0.000358593	6.00397e-05	5.9726
1011	Industrial Park	IP1011	North China	Inner Mongolia		40.9698	106.85	40.9598	106.83	40.9811	106.868	0.00019366	8.35213e-05	2.31869
1012	Industrial Hotspot	IH1012	North China	Inner Mongolia		41.8786	110.107	41.8786	110.107	41.8786	110.107	0.000175328	1.15846e-05	15.1346
1013	Industrial Hotspot	IH1013	North China	Hebei		41.0218	118.796	41.0218	118.796	41.0218	118.796	0.000133631	9.20618e-06	14.5154
1014	Industrial Park	IP1014	North China	Shaanxi		39.1863	110.783	39.1813	110.769	39.1998	110.796	0.000586145	0.000103363	5.67076
1015	Industrial Hotspot	IH1015	North China	Shaanxi		38.9623	110.574	38.9623	110.574	38.9623	110.574	0.000440678	0.000225436	1.95478
1016	Industrial Hotspot	IH1016	Northwest China	Xinjiang		42.5317	94.1227	42.5317	94.1227	42.5317	94.1227	0.000118636	4.99136e-06	23.7683
1017	Industrial Hotspot	IH1017	North China	Liaoning		40.7454	120.965	40.7454	120.965	40.7454	120.965	0.00100526	0.000452983	2.2192
1018	Industrial Hotspot	IH1018	North China	Henan		36.1298	113.871	36.1298	113.871	36.1298	113.871	0.00140779	0.000324385	4.33986
1019	Industrial Park	IP1019	North China	Liaoning		42.1141	123.694	42.1053	123.682	42.1248	123.709	0.000328461	0.00015957	2.05842
1020	Industrial Hotspot	IH1020	Northeast China	Liaoning		42.7784	124.173	42.7784	124.173	42.7784	124.173	0.000164488	0.000192466	0.854634
1021	Industrial Hotspot	IH1021	North China	Hebei		40.0435	118.553	40.0435	118.553	40.0435	118.553	0.00212123	0.00179154	1.18403
1022	Industrial Hotspot	IH1022	North China	Shandong		35.7849	118.199	35.7849	118.199	35.7849	118.199	0.000731057	1.57563e-05	46.3978
1023	Industrial Hotspot	IH1023	North China	Shandong		36.1234	119.026	36.1234	119.026	36.1234	119.026	0.000875809	7.66893e-05	11.4202
1024	Industrial Hotspot	IH1024	North China	Shandong		35.2925	117.889	35.2925	117.889	35.2925	117.889	0.000946397	0.000151759	6.23619
1025	Industrial Hotspot	IH1025	North China	Gansu		36.2895	103.434	36.2895	103.434	36.2895	103.434	0.000387398	7.10023e-06	54.5614
1026	Industrial Hotspot	IH1026	North China	Ningxia		37.1486	106.738	37.1486	106.738	37.1486	106.738	0.000188715	1.95253e-05	9.66515
1027	Industrial Hotspot	IH1027	East China	Jiangsu		31.8459	118.649	31.8459	118.649	31.8459	118.649	0.00113918	0.000174041	6.54547
1028	Industrial Hotspot	IH1028	North China	Shandong		35.1311	118.169	35.1311	118.169	35.1311	118.169	0.00146297	0.00013175	11.1041
1029	Industrial Hotspot	IH1029	North China	Shandong		35.2303	118.103	35.2303	118.103	35.2303	118.103	0.00111461	0.00013175	8.46004
1030	Industrial Hotspot	IH1030	North China	Shaanxi		34.1498	109.237	34.1498	109.237	34.1498	109.237	0.00149204	0.000169284	8.81383
1031	Industrial Hotspot	IH1031	North China	Tianjin		38.8625	117.192	38.8625	117.192	38.8625	117.192	0.0010046	7.27142e-05	13.8157
1032	Industrial Hotspot	IH1032	North China	Tianjin		38.9947	117.5	38.9947	117.5	38.9947	117.5	0.00174469	0.000703393	2.48039
1033	Industrial Hotspot	IH1033	Northeast China	Jilin		45.7218	121.779	45.7218	121.779	45.7218	121.779	0.000152845	1.72746e-05	8.84795
1034	Industrial Hotspot	IH1034	Southwest China	Yunnan		25.3693	101.873	25.3693	101.873	25.3693	101.873	0.000133793	3.60706e-06	37.092
1035	Industrial Hotspot	IH1035	North China	Shandong		37.6851	120.283	37.6851	120.283	37.6851	120.283	0.000735205	0.000928415	0.791893
1036	Industrial Hotspot	IH1036	North China	Henan		36.0864	114.068	36.0864	114.068	36.0864	114.068	0.00138327	0.000182242	7.59027
1037	Industrial Hotspot	IH1037	North China	Shandong		35.6575	118.832	35.6575	118.832	35.6575	118.832	0.00085092	0.000197851	4.30081
1038	Industrial Hotspot	IH1038	North China	Shandong		34.9683	117.893	34.9683	117.893	34.9683	117.893	0.00109649	3.81566e-05	28.7365
1039	Industrial Hotspot	IH1039	North China	Jiangsu		33.9266	118.24	33.9266	118.24	33.9266	118.24	0.000968381	0.000145672	6.6477
1040	Industrial Hotspot	IH1040	East China	Anhui		31.0635	119.594	31.0635	119.594	31.0635	119.594	0.00135512	6.06447e-05	22.3452
1041	Industrial Hotspot	IH1041	East China	Anhui		31.5381	117.857	31.5381	117.857	31.5381	117.857	0.00114345	0.000166683	6.86005
1042	Industrial Park	IP1042	North China	Inner Mongolia		39.4404	106.973	39.4286	106.94	39.4648	106.999	0.000312012	0.000797499	0.391238
1043	Industrial Hotspot	IH1043	North China	Shanxi		37.4608	110.951	37.4608	110.951	37.4608	110.951	0.000729572	0.00061246	1.19122
1044	Industrial Hotspot	IH1044	North China	Gansu		35.791	104.287	35.791	104.287	35.791	104.287	0.000245362	7.72896e-06	31.7458
1045	Industrial Hotspot	IH1045	Northwest China	Xinjiang		44.6875	83.0417	44.6875	83.0417	44.6875	83.0417	9.91935e-05	6.77817e-07	146.343
1046	Industrial Hotspot	IH1046	North China	Jiangsu		34.5752	119.454	34.5752	119.454	34.5752	119.454	0.000758128	0.000138277	5.48268
1047	Industrial Park	IP1047	North China	Anhui		33.1977	115.419	33.1862	115.407	33.2055	115.435	0.000800273	6.98598e-05	11.4554
1048	Industrial Hotspot	IH1048	East China	Hubei		30.5199	111.23	30.5199	111.23	30.5199	111.23	0.000522169	4.73434e-05	11.0294
1049	Industrial Hotspot	IH1049	Northwest China	Xinjiang		44.2045	85.7625	44.2045	85.7625	44.2045	85.7625	0.000603977	8.78762e-06	68.7304
1050	Industrial Hotspot	IH1050	Northwest China	Xinjiang		41.0656	80.1429	41.052	80.116	41.0843	80.1806	0.000234802	3.80824e-05	6.16564
1051	Industrial Hotspot	IH1051	North China	Liaoning		40.7009	122.278	40.7009	122.278	40.7009	122.278	0.000943709	0.000922647	1.02283
1052	Industrial Park	IP1052	Southwest China	Yunnan		25.0334	102.879	25.0268	102.872	25.0396	102.895	0.000161991	0.000121287	1.3356
1053	Industrial Hotspot	IH1053	North China	Inner Mongolia		39.9012	111.703	39.9012	111.703	39.9012	111.703	0.00033464	0.000113093	2.95899
1054	Industrial Park	IP1054	North China	Liaoning		39.1896	122.062	39.1777	122.047	39.2063	122.075	0.000536542	7.66832e-05	6.99686
1055	Industrial Hotspot	IH1055	East China	Fujian		26.7786	117.474	26.7786	117.474	26.7786	117.474	0.000234174	1.03482e-05	22.6294
1056	Industrial Park	IP1056	Northwest China	Xinjiang		41.4726	84.2115	41.463	84.2035	41.4806	84.226	0.000114532	1.62431e-06	70.5112
1057	Industrial Park	IP1057	South China	Fujian		25.1814	118.937	25.169	118.922	25.1939	118.958	0.000364532	0.000207438	1.75731
1058	Industrial Park	IP1058	North China	Inner Mongolia		40.392	113.009	40.3845	112.985	40.416	113.025	0.000708973	0.000307708	2.30405
1059	Industrial Hotspot	IH1059	North China	Shanxi		39.8258	113.002	39.8258	113.002	39.8258	113.002	0.000986762	0.000382859	2.57735
1060	Industrial Park	IP1060	North China	Shanxi		36.365	112.853	36.3606	112.839	36.3722	112.87	0.000994026	0.000363364	2.73562
1061	Industrial Hotspot	IH1061	North China	Shanxi		38.367	112.735	38.367	112.735	38.367	112.735	0.000800844	0.000173303	4.62105
1062	Industrial Hotspot	IH1062	North China	Shanxi		39.2157	112.388	39.2157	112.388	39.2157	112.388	0.000498692	0.000176317	2.82838
1063	Industrial Park	IP1063	North China	Ningxia		38.4261	106.118	38.418	106.108	38.4342	106.129	0.000603171	0.00176571	0.341602
1064	Industrial Hotspot	IH1064	North China	Shaanxi		35.6106	110.541	35.6106	110.541	35.6106	110.541	0.00135757	0.000679202	1.99876
1065	Industrial Hotspot	IH1065	North China	Gansu		33.7211	105.665	33.7211	105.665	33.7211	105.665	0.000183327	2.57339e-05	7.12394
1066	Industrial Hotspot	IH1066	North China	Shaanxi		35.0096	108.976	35.0096	108.976	35.0096	108.976	0.000898374	2.6675e-05	33.6785
1067	Industrial Hotspot	IH1067	North China	Shaanxi		33.1934	107.455	33.1934	107.455	33.1934	107.455	0.000350298	8.96524e-05	3.90729
1068	Industrial Hotspot	IH1068	East China	Shaanxi		32.8337	109.295	32.8337	109.295	32.8337	109.295	0.000366182	1.01237e-05	36.1708
1069	Industrial Hotspot	IH1069	Southwest China	Chongqing		29.5909	107.432	29.5909	107.432	29.5909	107.432	0.000793013	0.000380782	2.08259
1070	Industrial Hotspot	IH1070	Southwest China	Chongqing		28.9293	106.884	28.9293	106.884	28.9293	106.884	0.00115298	0.000221052	5.21586
1071	Industrial Hotspot	IH1071	Southwest China	Chongqing		29.2257	106.011	29.2257	106.011	29.2257	106.011	0.00143206	0.000119546	11.9791
1072	Industrial Park	IP1072	Northwest China	Xinjiang		43.1273	89.456	43.1151	89.4442	43.1357	89.4763	0.000221415	1.67168e-06	132.451
1073	Industrial Hotspot	IH1073	North China	Shanxi		35.3785	111.202	35.3785	111.202	35.3785	111.202	0.00104024	0.000101147	10.2844
1074	Industrial Hotspot	IH1074	East China	Zhejiang		29.1688	119.571	29.1688	119.571	29.1688	119.571	0.000219898	0.000297385	0.739438
1075	Industrial Hotspot	IH1075	East China	Jiangsu		31.5003	119.609	31.5003	119.609	31.5003	119.609	0.00126237	0.000252732	4.99489
1076	Industrial Hotspot	IH1076	East China	Anhui		31.8982	118.401	31.8982	118.401	31.8982	118.401	0.0012203	5.96906e-05	20.4437
1077	Industrial Hotspot	IH1077	East China	Hunan		27.1309	111.494	27.1309	111.494	27.1309	111.494	0.000577496	9.80835e-05	5.8878
1078	Industrial Hotspot	IH1078	East China	Hunan		26.3405	112.811	26.3405	112.811	26.3405	112.811	0.000748701	0.000145352	5.15097
1079	Industrial Park	IP1079	East China	Hunan		26.9735	112.637	26.9644	112.618	26.9831	112.647	0.000481963	0.000457265	1.05401
1080	Industrial Hotspot	IH1080	Southwest China	Guizhou		27.5133	106.896	27.5133	106.896	27.5133	106.896	0.000383304	0.000466903	0.820949
1081	Industrial Hotspot	IH1081	East China	Hunan		28.3141	112.237	28.3141	112.237	28.3141	112.237	0.000892654	2.22157e-05	40.1813
1082	Industrial Hotspot	IH1082	East China	Hunan		25.5605	112.359	25.5605	112.359	25.5605	112.359	0.000422914	6.44032e-05	6.56667
1083	Industrial Hotspot	IH1083	Southwest China	Guizhou		26.2391	106.711	26.2391	106.711	26.2391	106.711	0.000219052	6.73191e-05	3.25393
1084	Industrial Park	IP1084	North China	Ningxia		37.8812	106.018	37.8704	106.009	37.8904	106.03	0.000379394	0.000661595	0.573454
1085	Industrial Hotspot	IH1085	Southwest China	Sichuan		29.9027	104.618	29.9027	104.618	29.9027	104.618	0.000848405	3.06958e-05	27.6392
1086	Industrial Hotspot	IH1086	North China	Liaoning		41.3448	123.472	41.3448	123.472	41.3448	123.472	0.00112706	0.000279097	4.03823
1087	Industrial Park	IP1087	North China	Shandong		36.6999	118.873	39.6896	118.855	39.7067	118.886	0.0018923	0.000143343	13.2012
1088	Industrial Park	IP1088	North China	Shandong		38.0741	117.734	38.0601	117.715	38.0884	117.747	0.00114037	9.74309e-05	11.7044
1089	Industrial Hotspot	IH1089	North China	Gansu		39.355	100.116	39.355	100.116	39.355	100.116	0.000105922	1.30505e-05	8.11631
1090	Industrial Park	IP1090	North China	Gansu		39.8246	98.2751	39.7793	98.2151	39.8449	98.3187	0.00024193	0.000513467	0.47117
1091	Industrial Park	IP1091	North China	Gansu		36.5916	104.217	36.5388	104.189	36.5653	104.227	0.000419652	0.000503308	0.833787
1092	Industrial Park	IP1092	North China	Shandong		37.2379	118.905	37.2208	118.877	37.2809	118.929	0.00107465	7.74478e-05	13.8758
1093	Industrial Hotspot	IH1093	North China	Hebei		37.235	114.9	37.235	114.9	37.235	114.9	0.000970107	8.36087e-05	11.6029
1094	Industrial Hotspot	IH1094	North China	Gansu		38.3556	102.057	38.3556	102.057	38.3556	102.057	0.000139662	0.000247289	0.564772
1095	Industrial Park	IP1095	North China	Inner Mongolia		39.8856	106.79	39.8628	106.755	39.8908	106.813	0.000974969	5.61661e-05	17.3587
1096	Industrial Park	IP1096	North China	Ningxia		37.5598	105.375	37.553	105.356	37.5644	105.38	0.000305168	7.579e-05	4.0265
1097	Industrial Hotspot	IH1097	North China	Ningxia		37.9085	105.97	37.9085	105.97	37.9085	105.97	0.000383751	0.000263096	1.4586
1098	Industrial Hotspot	IH1098	North China	Ningxia		37.4354	105.636	37.4354	105.636	37.4354	105.636	0.00031703	0.000146622	2.16222
1099	Industrial Hotspot	IH1099	North China	Shaanxi		34.0511	109.265	34.0511	109.265	34.0511	109.265	0.000797966	4.87477e-05	16.3693
1100	Industrial Hotspot	IH1100	North China	Gansu		35.3616	103.252	35.3616	103.252	35.3616	103.252	0.000150332	1.21222e-05	12.4014
1101	Industrial Hotspot	IH1101	Northwest China	Gansu	Maligou	36.5943	104.119	36.5943	104.119	36.5943	104.119	0.000456486	0.000503308	0.906971
1102	Industrial Park	IP1102	Northwest China	Xinjiang		43.5336	83.2719	43.524	83.256	43.5366	83.2793	0.000150878	1.91602e-05	7.87456
1103	Industrial Park	IP1103	Northwest China	Xinjiang		43.9443	81.4757	43.9382	81.4488	43.9587	81.4947	0.000140577	0.000363904	0.386301
1104	Industrial Hotspot	IH1104	North China	Shaanxi		39.217	110.582	39.217	110.582	39.217	110.582	0.000471995	0.000103044	4.58054
1105	Industrial Park	IP1105	North China	Shaanxi		39.0583	110.905	39.0493	110.885	39.0697	110.917	0.000539988	0.000103363	5.2242
1106	Industrial Park	IP1106	North China	Shaanxi		39.1342	110.346	39.1256	110.334	39.1421	110.36	0.000706969	0.000109373	6.46383
1107	Industrial Park	IP1107	North China	Inner Mongolia		39.4377	106.701	39.4076	106.668	39.4795	106.727	0.00088225	0.000689575	1.27941
1108	Industrial Hotspot	IH1108	North China	Shanxi		39.9426	113.081	39.9426	113.081	39.9426	113.081	0.00158896	0.000617933	2.57141
1109	Industrial Park	IP1109	North China	Shanxi		35.8812	111.378	35.8643	111.364	35.8912	111.391	0.00104545	0.00025764	4.05781
1110	Industrial Hotspot	IH1110	North China	Shaanxi		34.9332	109.067	34.9332	109.067	34.9332	109.067	0.000843981	7.07745e-05	11.9249
1111	Industrial Park	IP1111	Northwest China	Xinjiang		43.9653	87.7066	43.9437	87.6903	43.981	87.735	0.00192073	0.00476927	0.40273
1112	Industrial Hotspot	IH1112	Northeast China	Jilin		42.7901	125.288	42.7901	125.288	42.7901	125.288	0.000332502	2.77594e-05	11.978
1113	Industrial Hotspot	IH1113	North China	Shanxi		38.1839	112.666	38.1839	112.666	38.1839	112.666	0.00101041	0.000143447	7.04379
1114	Industrial Hotspot	IH1114	North China	Hebei		36.9189	114.316	36.9189	114.316	36.9189	114.316	0.00200745	0.00031505	6.37185
1115	Industrial Hotspot	IH1115	North China	Hebei		37.4982	114.437	37.4982	114.437	37.4982	114.437	0.00191294	0.000126122	15.1674
1116	Industrial Hotspot	IH1116	North China	Hebei		38.9691	115.012	38.9691	115.012	38.9691	115.012	0.00163883	8.65092e-05	18.9439
1117	Industrial Hotspot	IH1117	North China	Shanxi		37.5007	112.042	37.5007	112.042	37.5007	112.042	0.00135743	0.000186589	7.27497
1118	Industrial Hotspot	IH1118	North China	Shanxi		37.3155	111.201	37.3155	111.201	37.3155	111.201	0.000539312	0.000256331	2.10397
1119	Industrial Hotspot	IH1119	North China	Shanxi		36.0785	111.647	36.0785	111.647	36.0785	111.647	0.000689072	0.000500728	1.37614
1120	Industrial Hotspot	IH1120	North China	Shanxi		35.7284	111.333	35.7284	111.333	35.7284	111.333	0.00121305	0.000292249	4.15073
1121	Industrial Hotspot	IH1121	North China	Shaanxi		34.9338	109.218	34.9338	109.218	34.9338	109.218	0.000810963	7.07745e-05	11.4584
1122	Industrial Hotspot	IH1122	North China	Shaanxi		35.0713	109.582	35.0713	109.582	35.0713	109.582	0.000719087	5.70925e-05	12.5951
1123	Industrial Hotspot	IH1123	North China	Shaanxi		34.6546	108.78	34.6546	108.78	34.6546	108.78	0.00117471	0.000190427	6.16883
1124	Industrial Park	IP1124	Northwest China	Xinjiang		44.4097	84.9638	44.3942	84.9164	44.4166	84.9982	0.000509742	0.00124278	0.410162
1125	Industrial Park	IP1125	Northwest China	Xinjiang		44.1079	88.7574	44.0914	88.7314	44.1118	88.7828	0.000372736	4.3323e-05	8.60366
1126	Industrial Hotspot	IH1126	Northwest China	Xinjiang		41.8407	86.2921	41.8407	86.2921	41.8407	86.2921	0.000156681	4.2875e-05	3.65436
1127	Industrial Hotspot	IH1127	Northwest China	Xinjiang		41.8543	86.2536	41.8543	86.2536	41.8543	86.2536	0.00022611	0.000574403	0.393645
1128	Industrial Hotspot	IH1128	North China	Liaoning		39.1892	122.045	39.1892	122.045	39.1892	122.045	0.000561542	7.66832e-05	7.32288
1129	Industrial Park	IP1129	North China	Hebei		40.5913	118.636	40.5845	118.627	40.6019	118.64	0.0003649	0.000447818	0.814839
1130	Industrial Hotspot	IH1130	North China	Hebei		40.6567	118.525	40.6567	118.525	40.6567	118.525	0.000938667	0.000438588	2.1402
1131	Industrial Hotspot	IH1131	North China	Liaoning		41.2143	120.783	41.2143	120.783	41.2143	120.783	0.000712351	4.50674e-05	15.8064
1132	Industrial Hotspot	IH1132	North China	Liaoning		40.8028	120.729	40.8028	120.729	40.8028	120.729	0.00114388	5.06792e-05	22.5711
1133	Industrial Park	IP1133	North China	Shandong		37.7042	118.175	37.6903	118.156	37.7216	118.188	0.000843534	0.000166099	5.07851
1134	Industrial Hotspot	IH1134	North China	Hebei		37.526	114.441	37.526	114.441	37.526	114.441	0.00170526	0.000219749	7.76004
1135	Industrial Hotspot	IH1135	North China	Hebei		39.8456	118.096	39.8456	118.096	39.8456	118.096	0.00172957	0.000571829	3.02463
1136	Industrial Hotspot	IH1136	North China	Hebei		39.8783	118.358	39.8783	118.358	39.8783	118.358	0.00173666	0.000471839	3.68062
1137	Industrial Hotspot	IH1137	North China	Hebei		39.5847	118.519	39.5847	118.519	39.5847	118.519	0.000479255	0.000534848	0.896059
1138	Industrial Park	IP1138	North China	Liaoning		38.9661	121.853	38.9428	121.821	38.9735	121.868	0.000442389	4.89752e-05	9.03291
1139	Industrial Hotspot	IH1139	North China	Liaoning		41.3848	123.491	41.3848	123.491	41.3848	123.491	0.000999887	0.000434291	2.30235
1140	Industrial Hotspot	IH1140	North China	Liaoning		40.7855	123.904	40.7855	123.904	40.7855	123.904	0.0003356	0.000184848	1.81554
1141	Industrial Park	IP1141	North China	Tianjin		39.2659	117.109	39.2458	117.102	39.2931	117.144	0.00178131	0.00142642	1.2488
1142	Industrial Park	IP1142	North China	Hebei		38.2905	117.689	38.2884	117.688	38.314	117.76	0.000901135	1.58885e-05	56.7162
1143	Industrial Park	IP1143	North China	Henan		34.7657	111.72	34.7603	111.713	34.7709	111.725	0.000954021	5.85004e-05	16.3079
1144	Industrial Hotspot	IH1144	North China	Henan		34.3277	113.181	34.3277	113.181	34.3277	113.181	0.00140033	0.000370661	3.77794
1145	Industrial Hotspot	IH1145	North China	Henan		33.3005	112.978	33.3005	112.978	33.3005	112.978	0.00108439	1.87504e-05	57.8331
1146	Industrial Park	IP1146	North China	Henan		34.5016	110.884	34.4973	110.877	34.5063	110.892	0.000770682	0.00013351	5.77245
1147	Industrial Hotspot	IH1147	Northwest China	Xinjiang		42.3945	86.309	42.3945	86.309	42.3945	86.309	0.000149337	9.60259e-05	1.55518
1148	Industrial Hotspot	IH1148	North China	Qinghai		36.4401	101.603	36.4401	101.603	36.4401	101.603	0.00035315	4.4489e-05	7.93792
1149	Industrial Park	IP1149	North China	Gansu		35.7755	103.71	35.7621	103.695	35.7983	103.731	0.00028801	4.52476e-06	63.652
1150	Industrial Hotspot	IH1150	Northwest China	Xinjiang		44.5798	86.0776	44.5798	86.0776	44.5798	86.0776	0.00066012	2.08643e-05	31.6387
1151	Industrial Hotspot	IH1151	Northwest China	Xinjiang		43.4416	82.4859	43.4416	82.4859	43.4416	82.4859	9.3204e-05	2.99098e-05	3.11617
1152	Industrial Park	IP1152	East China	Zhejiang		30.26	119.841	30.2495	119.82	30.2743	119.864	0.00168126	0.00010235	16.4266
1153	Industrial Hotspot	IH1153	North China	Hebei		36.2972	114.098	36.2972	114.098	36.2972	114.098	0.0015187	0.000471072	3.22392
1154	Industrial Park	IP1154	North China	Shandong		34.9662	118.349	34.9595	118.343	34.9723	118.357	0.000852035	0.000430688	1.97831
1155	Industrial Park	IP1155	North China	Shandong		34.9559	118.299	34.9456	118.285	34.9678	118.315	0.00104705	0.000430688	2.43111
1156	Industrial Park	IP1156	North China	Jiangsu		34.4049	119.841	34.3894	119.825	34.4253	119.858	0.000551823	2.27524e-05	24.2534
1157	Industrial Park	IP1157	North China	Liaoning		38.9944	121.846	38.9779	121.824	39.0085	121.872	0.000413245	0.000181498	2.27686
1158	Industrial Hotspot	IH1158	North China	Hebei		37.6139	115.634	37.6139	115.634	37.6139	115.634	0.000919259	0.000617657	1.4883
1159	Industrial Hotspot	IH1159	Northwest China	Xinjiang		42.5103	94.1382	42.5103	94.1382	42.5103	94.1382	0.000114346	4.78241e-06	23.9096
1160	Industrial Hotspot	IH1160	North China	Shandong		35.9978	116.373	35.9978	116.373	35.9978	116.373	0.00116371	0.000243347	4.7821
1161	Industrial Hotspot	IH1161	East China	Jiangxi		28.6993	118.314	28.6993	118.314	28.6993	118.314	0.000577066	7.77113e-05	7.42577
1162	Industrial Hotspot	IH1162	East China	Hunan		27.732	112.215	27.732	112.215	27.732	112.215	0.000640062	9.81035e-05	6.52435
1163	Industrial Hotspot	IH1163	North China	Henan		34.401	112.575	34.401	112.575	34.401	112.575	0.00123131	0.000119203	10.3295
1164	Industrial Hotspot	IH1164	North China	Gansu		33.4084	104.894	33.4084	104.894	33.4084	104.894	0.000157089	4.09714e-05	3.83411
1165	Industrial Hotspot	IH1165	North China	Shaanxi		33.1782	106.679	33.1782	106.679	33.1782	106.679	0.000257701	6.18936e-05	4.16361
1166	Industrial Park	IP1166	Southwest China	Chongqing		29.8178	106.507	29.8053	106.503	29.8323	106.547	0.0011235	0.00024084	4.6649
1167	Industrial Hotspot	IH1167	Southwest China	Chongqing		30.0591	106.574	30.0591	106.574	30.0591	106.574	0.00113191	8.08713e-05	13.9965
1168	Industrial Hotspot	IH1168	Southwest China	Chongqing		29.964	106.379	29.964	106.379	29.964	106.379	0.00139875	0.000325563	4.2964
1169	Industrial Hotspot	IH1169	Southwest China	Chongqing		29.9484	106.361	29.9484	106.361	29.9484	106.361	0.00151822	0.000325563	4.66336
1170	Industrial Hotspot	IH1170	Southwest China	Chongqing		29.3374	106.4	29.3374	106.4	29.3374	106.4	0.00226763	0.000341088	6.64823
1171	Industrial Hotspot	IH1171	North China	Liaoning		40.7982	122.085	40.7982	122.085	40.7982	122.085	0.000748167	0.000201942	3.70486
1172	Industrial Hotspot	IH1172	Southwest China	Yunnan		26.5688	100.16	26.5688	100.16	26.5688	100.16	7.52007e-05	3.60295e-05	2.0872
1173	Industrial Hotspot	IH1173	Northeast China	Inner Mongolia		48.0834	123.451	48.0834	123.451	48.0834	123.451	0.000222274	0.000213049	1.0433
1174	Industrial Hotspot	IH1174	Northeast China	Jilin		43.3308	125.932	43.3308	125.932	43.3308	125.932	0.000489536	6.77344e-05	7.22729
1175	Industrial Park	IP1175	North China	Shaanxi		39.2779	110.395	39.267	110.377	39.2876	110.4	0.000690331	6.98636e-05	9.88113
1176	Industrial Park	IP1176	North China	Shaanxi		39.2501	110.324	39.2416	110.313	39.2595	110.34	0.000789497	8.96184e-05	8.80954
1177	Industrial Hotspot	IH1177	North China	Gansu		35.3218	102.786	35.3218	102.786	35.3218	102.786	0.000135806	2.91226e-06	46.6327
1178	Industrial Hotspot	IH1178	East China	Anhui		30.906	117.773	30.906	117.773	30.906	117.773	0.000965624	0.000876802	1.1013
1179	Industrial Hotspot	IH1179	North China	Gansu		33.0422	104.452	33.0422	104.452	33.0422	104.452	0.0001117	2.62813e-06	42.5019
1180	Industrial Park	IP1180	Southwest China	Sichuan		29.258	103.28	29.2496	103.273	29.274	103.281	0.000458827	1.06348e-05	43.1437
1181	Industrial Hotspot	IH1181	East China	Chongqing		30.1006	108.145	30.1006	108.145	30.1006	108.145	0.000361639	2.11406e-05	17.1064
1182	Industrial Hotspot	IH1182	East China	Chongqing		29.1696	108.249	29.1696	108.249	29.1696	108.249	0.000296462	6.28975e-06	47.1342
1183	Industrial Park	IP1183	Southwest China	Chongqing		29.1079	107.051	29.095	107.037	29.1218	107.066	0.000900561	5.75931e-05	15.6366
1184	Industrial Hotspot	IH1184	Southwest China	Chongqing		28.9837	106.855	28.9837	106.855	28.9837	106.855	0.000925933	0.000204864	4.51975
1185	Industrial Park	IP1185	Southwest China	Yunnan		28.6318	104.409	28.6177	104.4	28.6404	104.421	0.000532797	2.30206e-05	23.1443
1186	Industrial Hotspot	IH1186	Southwest China	Sichuan		28.4348	104.845	28.4348	104.845	28.4348	104.845	0.000672456	4.33748e-05	15.5034
1187	Industrial Hotspot	IH1187	Southwest China	Chongqing		29.3668	106.406	29.3668	106.406	29.3668	106.406	0.0021142	0.000341088	6.1984
1188	Industrial Hotspot	IH1188	Southwest China	Sichuan		28.0892	105.537	28.0892	105.537	28.0892	105.537	0.00018717	4.36311e-06	42.8983
1189	Industrial Hotspot	IH1189	Southwest China	Sichuan		28.3181	105.178	28.3181	105.178	28.3181	105.178	0.000676129	2.35378e-05	28.7253
1190	Industrial Hotspot	IH1190	Southwest China	Sichuan		30.7668	107.06	30.7668	107.06	30.7668	107.06	0.000711984	6.96856e-05	10.2171
1191	Industrial Hotspot	IH1191	Southwest China	Sichuan		31.2588	104.043	31.2588	104.043	31.2588	104.043	0.000584648	0.00016163	3.61721
1192	Industrial Park	IP1192	Northwest China	Xinjiang		41.0404	80.1697	41.0284	80.1551	41.0434	80.1744	0.000164273	3.80824e-05	4.31363
1193	Industrial Hotspot	IH1193	Northwest China	Qinghai	Guolemude	35.9904	94.827	35.9904	94.827	35.9904	94.827	5.42e-05	2.51e-08	2159.36
1194	Industrial Hotspot	IH1194	North China	Liaoning		40.3521	122.193	40.3521	122.193	40.3521	122.193	0.000495159	0.000140887	3.51459
1195	Industrial Park	IP1195	North China	Liaoning		41.7896	123.256	41.7823	123.246	41.7981	123.267	0.00191047	0.00583043	0.327671
1196	Industrial Hotspot	IH1196	North China	Shaanxi		39.2802	110.735	39.2802	110.735	39.2802	110.735	0.000710198	6.48583e-05	10.95
1197	Industrial Hotspot	IH1197	North China	Shanxi		39.4083	112.575	39.4083	112.575	39.4083	112.575	0.000554845	0.000327657	1.69337
1198	Industrial Hotspot	IH1198	North China	Hebei		36.513	113.619	36.513	113.619	36.513	113.619	0.00124181	0.000296793	4.1841
1199	Industrial Park	IP1199	North China	Ningxia		38.2084	105.97	38.1985	105.958	38.2201	105.974	0.000419291	3.63037e-05	11.5495
1200	Industrial Park	IP1200	North China	Henan		35.1878	112.847	35.1811	112.838	35.1965	112.858	0.00171753	0.000417253	4.11628
1201	Industrial Hotspot	IH1201	North China	Hebei		37.4809	114.47	37.4809	114.47	37.4809	114.47	0.00150373	5.122e-05	29.3582
1202	Industrial Hotspot	IH1202	North China	Shandong		36.7016	118.093	36.7016	118.093	36.7016	118.093	0.000774677	0.000413703	1.87255
1203	Industrial Hotspot	IH1203	North China	Shaanxi		33.0975	106.995	33.0975	106.995	33.0975	106.995	0.000362279	0.000110723	3.27193
1204	Industrial Hotspot	IH1204	North China	Shaanxi		33.1422	106.837	33.1422	106.837	33.1422	106.837	0.000309743	7.64088e-05	4.05376
1205	Industrial Park	IP1205	East China	Chongqing		29.4404	108.727	29.429	108.718	29.459	108.739	0.000267035	1.81416e-05	14.7195
1206	Industrial Hotspot	IH1206	South China	Hunan		25.1706	111.541	25.1706	111.541	25.1706	111.541	0.000430316	1.09249e-05	39.3885
1207	Industrial Hotspot	IH1207	South China	Guangxi		24.4246	109.681	24.4249	109.677	24.4249	109.687	0.000333512	4.41753e-05	7.54974
1208	Industrial Hotspot	IH1208	South China	Jiangxi		24.9133	114.844	24.9133	114.844	24.9133	114.844	9.61535e-05	5.3826e-05	1.78638
1209	Industrial Hotspot	IH1209	North China	Inner Mongolia		42.4406	121.264	42.4406	121.264	42.4406	121.264	0.000206464	9.41397e-06	21.9316
1210	Industrial Park	IP1210	East China	Hunan		25.6485	111.955	25.6395	111.937	25.6599	111.975	0.000345709	2.98522e-05	11.5807
1211	Industrial Hotspot	IH1211	Northwest China	Xinjiang		41.7071	83.4651	41.7071	83.4651	41.7071	83.4651	7.58033e-05	6.43672e-06	11.7767
1212	Industrial Hotspot	IH1212	Northeast China	Inner Mongolia		50.5635	123.211	50.5635	123.211	50.5635	123.211	7.52603e-05	4.24438e-05	1.77317
1213	Industrial Hotspot	IH1213	North China	Inner Mongolia		39.4327	111.239	39.4327	111.239	39.4327	111.239	0.00058678	0.000319281	1.83782
1214	Industrial Hotspot	IH1214	East China	Fujian	Longzhudou	26.773	119.739	26.773	119.739	26.773	119.739	0.000132471	3.59e-05	3.69
1215	Industrial Hotspot	IH1215	North China	Gansu		39.9171	98.2547	39.9171	98.2547	39.9171	98.2547	9.59318e-05	0.000483046	0.198597
1216	Industrial Hotspot	IH1216	North China	Shandong		35.215	118.104	35.215	118.104	35.215	118.104	0.00125602	0.00013175	9.53336
1217	Industrial Park	IP1217	Northeast China	Jilin		43.2861	124.617	43.2763	124.609	43.2972	124.623	0.000277703	0.00011682	2.37719
1218	Industrial Park	IP1218	Northeast China	Inner Mongolia		43.6274	115.854	43.6201	115.845	43.6348	115.862	0.000105817	3.01702e-06	35.0734
1219	Industrial Park	IP1219	North China	Liaoning		40.6206	122.59	40.6066	122.572	40.6331	122.622	0.000557811	0.000413211	1.34994
1220	Industrial Hotspot	IH1220	Northeast China	Heilongjiang		45.2814	131.018	45.2814	131.018	45.2814	131.018	0.000126843	0.000167679	0.756464
1221	Industrial Hotspot	IH1221	North China	Hebei		39.7979	118.023	39.7979	118.023	39.7979	118.023	0.00189342	0.000571829	3.31117
1222	Industrial Park	IP1222	North China	Hebei		39.2862	118.074	39.2694	118.06	39.3046	118.09	0.00130595	0.000144514	9.03684
1223	Industrial Park	IP1223	North China	Liaoning		41.9204	124.094	41.9164	124.086	41.9284	124.103	0.000438668	0.0004741	0.925265
1224	Industrial Hotspot	IH1224	North China	Hebei		39.9324	117.821	39.9324	117.821	39.9324	117.821	0.00175896	0.000283871	6.19634
1225	Industrial Park	IP1225	North China	Shandong		36.7293	117.425	36.7237	117.415	36.7377	117.437	0.0012899	0.000132297	9.75004
1226	Industrial Hotspot	IH1226	North China	Hebei		37.0658	114.334	37.0658	114.334	37.0658	114.334	0.00254112	0.000509277	4.98966
1227	Industrial Hotspot	IH1227	East China	Hubei		29.7425	113.986	29.7425	113.986	29.7425	113.986	0.00100565	0.000144682	6.95075
1228	Industrial Park	IP1228	South China	Hainan		19.0569	108.635	19.0277	108.628	19.0771	108.646	0.000131356	0.000152773	0.859811
1229	Industrial Hotspot	IH1229	Northwest China	Xinjiang		38.9636	83.6549	38.9636	83.6549	38.9636	83.6549	3.4418e-05	1.07473e-06	32.0248
1230	Industrial Hotspot	IH1230	Northeast China	Heilongjiang		47.2672	124.778	47.2672	124.778	47.2672	124.778	0.00030744	1.2591e-05	24.4175
1231	Industrial Hotspot	IH1231	North China	Inner Mongolia		41.711	113.105	41.711	113.105	41.711	113.105	0.000215975	1.92118e-05	11.2418
1232	Industrial Park	IP1232	North China	Henan		35.1791	113.099	35.1732	113.095	35.1907	113.108	0.00156685	0.00051988	3.01387
1233	Industrial Park	IP1233	Northeast China	Inner Mongolia		42.8491	120.688	42.8421	120.683	42.8571	120.692	0.000268447	0.000177161	1.51528
1234	Industrial Hotspot	IH1234	Northeast China	Inner Mongolia		42.7819	121.916	42.7819	121.916	42.7819	121.916	0.000341047	8.68303e-06	39.2774
1235	Industrial Hotspot	IH1235	North China	Liaoning		41.3088	123.336	41.3088	123.336	41.3088	123.336	0.000524292	0.000279097	1.87853
1236	Industrial Hotspot	IH1236	North China	Shandong		37.441	120.983	37.441	120.983	37.441	120.983	0.000536272	9.93393e-05	5.39839
1237	Industrial Park	IP1237	North China	Shandong		37.4811	121.061	37.4632	121.046	37.4969	121.077	0.0005685	0.000177702	3.19918
1238	Industrial Hotspot	IH1238	North China	Shandong		36.0346	118.947	36.0346	118.947	36.0346	118.947	0.000750524	3.49655e-05	21.4647
1239	Industrial Hotspot	IH1239	North China	Hebei		39.2724	119.095	39.2724	119.095	39.2724	119.095	0.000974452	2.71886e-05	35.8404
1240	Industrial Hotspot	IH1240	North China	Henan		34.6913	112.932	34.6913	112.932	34.6913	112.932	0.00158281	0.000420872	3.76079
1241	Industrial Hotspot	IH1241	East China	Henan		32.6211	111.732	32.6211	111.732	32.6211	111.732	0.000769674	9.80882e-05	7.84675
1242	Industrial Hotspot	IH1242	Northwest China	Xinjiang		42.7067	93.3453	42.7067	93.3453	42.7067	93.3453	0.000175527	4.42419e-05	3.96745
1243	Industrial Hotspot	IH1243	Northwest China	Gansu		39.5918	94.3083	39.5918	94.3083	39.5918	94.3083	7.97777e-05	2.5204e-05	3.16529
1244	Industrial Hotspot	IH1244	South China	Fujian		24.5243	118.089	24.5243	118.089	24.5243	118.089	0.000635926	0.000616051	1.03226
1245	Industrial Park	IP1245	North China	Shandong		36.4851	115.476	36.4769	115.468	36.4951	115.485	0.00125908	0.000173258	7.26709
1246	Industrial Hotspot	IH1246	Northeast China	Heilongjiang		46.1635	130.848	46.1635	130.848	46.1635	130.848	0.000195054	3.30264e-06	59.06
1247	Industrial Park	IP1247	Northeast China	Jilin		43.9318	126.518	43.9154	126.494	43.9477	126.571	0.00103213	0.00195626	0.527607
1248	Industrial Hotspot	IH1248	North China	Liaoning		41.7384	123.812	41.7384	123.812	41.7384	123.812	0.000528791	0.000413743	1.27807
1249	Industrial Hotspot	IH1249	North China	Inner Mongolia		42.244	120.788	42.244	120.788	42.244	120.788	0.000362404	1.43113e-05	25.3229
1250	Industrial Hotspot	IH1250	North China	Liaoning		41.3492	123.743	41.3492	123.743	41.3492	123.743	0.00172002	0.000808273	2.12802
1251	Industrial Park	IP1251	North China	Shandong		37.4322	120.045	37.4231	120.014	37.4386	120.055	0.000687663	0.000271486	2.53295
1252	Industrial Hotspot	IH1252	Northwest China	Xinjiang		42.8248	87.9149	42.8248	87.9149	42.8248	87.9149	0.000306778	3.44223e-06	89.1219
1253	Industrial Park	IP1253	North China	Gansu		38.8442	100.821	38.8381	100.807	38.8526	100.833	0.000139603	1.46009e-06	95.6122
1254	Industrial Park	IP1254	North China	Liaoning		41.2131	123.226	41.1978	123.205	41.2321	123.251	7.22577e-05	0.00141168	0.0511858
1255	Industrial Hotspot	IH1255	North China	Shandong		35.0201	117.347	35.0201	117.347	35.0201	117.347	0.000935108	9.9657e-05	9.38327
1256	Industrial Hotspot	IH1256	North China	Inner Mongolia		41.0004	109.25	41.0004	109.25	41.0004	109.25	0.000412554	6.96698e-06	59.2157
1257	Industrial Park	IP1257	North China	Ningxia		37.8475	106.141	37.8442	106.132	37.8535	106.152	0.000343776	0.000676922	0.507852
1258	Industrial Park	IP1258	North China	Ningxia		37.4233	105.68	37.3981	105.662	37.4569	105.711	0.000240453	0.000146622	1.63995
1259	Industrial Hotspot	IH1259	North China	Gansu		34.7403	105.22	34.7403	105.22	34.7403	105.22	0.000183321	1.18543e-05	15.4645
1260	Industrial Hotspot	IH1260	North China	Tianjin		39.2321	117.458	39.2321	117.458	39.2321	117.458	0.00129118	0.00221738	0.5823
1261	Industrial Park	IP1261	North China	Shanxi		38.7847	112.756	38.778	112.749	38.7952	112.769	0.0004877	3.58976e-05	13.5858
1262	Industrial Hotspot	IH1262	North China	Shanxi		37.8124	112.74	37.8124	112.74	37.8124	112.74	0.000907972	0.00347634	0.261186
1263	Industrial Park	IP1263	North China	Shaanxi		38.8442	110.32	38.8358	110.309	38.8542	110.334	0.000618209	0.000288449	2.14322
1264	Industrial Hotspot	IH1264	North China	Shanxi		37.2238	111.371	37.2238	111.371	37.2238	111.371	0.00119686	4.84924e-05	24.6814
1265	Industrial Park	IP1265	North China	Shaanxi		38.5989	109.962	38.5846	109.95	38.6149	109.993	0.000420897	7.91777e-05	5.31585
1266	Industrial Park	IP1266	North China	Shandong		35.7083	118.9	35.7089	118.899	35.7349	118.927	0.000825105	0.000197851	4.17033
1267	Industrial Hotspot	IH1267	North China	Ningxia		38.5341	106.089	38.5341	106.089	38.5341	106.089	0.000612568	0.000276747	2.21345
1268	Industrial Hotspot	IH1268	North China	Shaanxi		39.1643	110.679	39.1643	110.679	39.1643	110.679	0.000772922	0.000103044	7.50092
1269	Industrial Park	IP1269	North China	Gansu		38.5154	102.28	38.492	102.253	38.5352	102.312	0.000109063	5.80973e-05	1.87725
1270	Industrial Park	IP1270	North China	Gansu		36.1211	103.611	36.1103	103.589	36.1355	103.634	0.000749046	0.00117318	0.638473
1271	Industrial Park	IP1271	North China	Shaanxi		34.9017	109.719	34.8907	109.705	34.9125	109.74	0.000697048	7.48785e-05	9.30905
1272	Industrial Hotspot	IH1272	North China	Gansu		35.4793	106.84	35.4793	106.84	35.4793	106.84	0.00028568	2.96888e-05	9.62249
1273	Industrial Hotspot	IH1273	East China	Hubei		30.6017	114.142	30.6017	114.142	30.6017	114.142	0.00167175	0.000653848	2.55679
1274	Industrial Hotspot	IH1274	Southwest China	Chongqing		28.954	106.9	28.954	106.9	28.954	106.9	0.000819409	0.000221052	3.70686
1275	Industrial Park	IP1275	Southwest China	Chongqing		29.6279	106.648	29.6219	106.641	29.6367	106.656	0.0016831	0.00136857	1.22982
1276	Industrial Hotspot	IH1276	Southwest China	Sichuan		30.0714	104.65	30.0714	104.65	30.0714	104.65	0.000875795	0.000238976	3.66478
1277	Industrial Hotspot	IH1277	North China	Shanxi		37.05	113.37	37.05	113.37	37.05	113.37	0.000694723	9.79414e-05	7.09325
1278	Industrial Hotspot	IH1278	Northwest China	Xinjiang	Hejing	42.676	86.2794	42.676	86.2794	42.676	86.2794	8.24e-05	9.33e-07	88.3173
1279	Industrial Hotspot	IH1279	Northeast China	Heilongjiang		44.6829	129.668	44.6829	129.668	44.6829	129.668	0.000339346	0.000664813	0.510438
1280	Industrial Hotspot	IH1280	Northeast China	Heilongjiang		46.3147	129.58	46.3147	129.58	46.3147	129.58	0.000329314	0.000128475	2.56326
1281	Industrial Hotspot	IH1281	Northeast China	Heilongjiang		45.9951	129.243	45.9951	129.243	45.9951	129.243	4.96798e-05	6.57422e-06	7.55675
1282	Industrial Hotspot	IH1282	East China	Hubei		31.3618	113.517	31.3618	113.517	31.3618	113.517	0.000718067	5.76465e-05	12.4564
1283	Industrial Park	IP1283	East China	Hubei		30.4003	114.369	30.3863	114.357	30.4154	114.382	0.00146393	0.000180148	8.12627
1284	Industrial Park	IP1284	Northwest China	Qinghai		37.3332	97.3966	37.3106	97.3703	37.3527	97.4265	8.38443e-05	4.49534e-05	1.86514
1285	Industrial Hotspot	IH1285	Northeast China	Heilongjiang		46.7172	129.596	46.7172	129.596	46.7172	129.596	0.000328029	1.10942e-05	29.5677
1286	Industrial Hotspot	IH1286	North China	Jilin		41.846	126.271	41.846	126.271	41.846	126.271	0.000221171	2.00678e-05	11.0212
1287	Industrial Hotspot	IH1287	Southwest China	Sichuan		30.8999	107.375	30.8999	107.375	30.8999	107.375	0.000581637	3.13329e-05	18.5632
1288	Industrial Hotspot	IH1288	Northeast China	Jilin		44.9908	123.365	44.9908	123.365	44.9908	123.365	0.00017151	5.49636e-06	31.2042
1289	Industrial Park	IP1289	North China	Hebei		37.9674	114.042	37.9618	114.036	37.9768	114.047	0.00193252	7.11073e-05	27.1776
1290	Industrial Hotspot	IH1290	North China	Shanxi		38.079	112.753	38.079	112.753	38.079	112.753	0.000536921	6.41062e-05	8.3755
1291	Industrial Hotspot	IH1291	North China	Shanxi		35.7633	111.724	35.7633	111.724	35.7633	111.724	0.000919544	0.000162671	5.65277
1292	Industrial Park	IP1292	North China	Henan		35.1358	112.625	35.1286	112.607	35.1404	112.642	0.00167808	0.00052781	3.17933
1293	Industrial Hotspot	IH1293	North China	Shanxi		35.9514	111.827	35.9514	111.827	35.9514	111.827	0.000632675	7.06985e-05	8.94891
1294	Industrial Hotspot	IH1294	North China	Henan		34.2692	112.623	34.2692	112.623	34.2692	112.623	0.00105987	0.000119203	8.89131
1295	Industrial Hotspot	IH1295	East China	Chongqing		31.0884	108.552	31.0884	108.552	31.0884	108.552	0.000319469	1.48738e-05	21.4786
1296	Industrial Hotspot	IH1296	Northeast China	Inner Mongolia		46.9735	122.315	46.9735	122.315	46.9735	122.315	0.000104645	2.7655e-06	37.8394
1297	Industrial Hotspot	IH1297	North China	Shanxi		35.7393	112.854	35.7393	112.854	35.7393	112.854	0.00121604	0.00097919	1.24189
1298	Industrial Park	IP1298	North China	Ningxia		39.2056	106.728	39.1913	106.713	39.2217	106.746	0.000498669	0.00029019	1.71842
1299	Industrial Hotspot	IH1299	South China	Guangxi		23.5259	111.281	23.5259	111.281	23.5259	111.281	0.000360871	2.48789e-05	14.5051
1300	Industrial Hotspot	IH1300	South China	Guangxi		23.5118	110.441	23.5118	110.441	23.5118	110.441	0.00029512	4.95428e-05	5.95688
1301	Industrial Park	IP1301	East China	Hubei		29.2703	113.82	29.255	113.807	29.285	113.835	0.000628407	4.88451e-05	12.8653
1302	Industrial Hotspot	IH1302	Northeast China	Inner Mongolia		43.6523	119.844	43.6523	119.844	43.6523	119.844	0.000233582	8.14183e-06	28.6892
1303	Industrial Hotspot	IH1303	North China	Qinghai		36.4055	102.599	36.4055	102.599	36.4055	102.599	0.000602772	1.76971e-05	34.0604
1304	Industrial Hotspot	IH1304	East China	Fujian		26.7758	117.939	26.7758	117.939	26.7758	117.939	0.000256053	3.03265e-05	8.44322
1305	Industrial Hotspot	IH1305	East China	Fujian		26.9963	118.304	26.9963	118.304	26.9963	118.304	0.000229956	2.35517e-05	9.76385
1306	Industrial Park	IP1306	North China	Jiangsu		34.3083	117.239	34.2959	117.216	34.3272	117.257	0.00113837	0.0015221	0.74789
1307	Industrial Park	IP1307	North China	Tianjin		39.009	117.092	39.0052	117.08	39.0168	117.109	0.00143625	0.00534949	0.268484
1308	Industrial Hotspot	IH1308	Southwest China	Chongqing		29.8196	107.043	29.8196	107.043	29.8196	107.043	0.000850605	0.000259584	3.2768
1309	Industrial Park	IP1309	North China	Shandong		35.162	119.212	35.1574	119.201	35.1683	119.225	0.00110417	0.000111099	9.93858
1310	Industrial Hotspot	IH1310	North China	Qinghai		36.2692	100.577	36.2692	100.577	36.2692	100.577	5.3389e-05	2.89845e-05	1.84199
1311	Industrial Park	IP1311	East China	Jiangsu		31.8489	120.955	31.8079	120.93	31.8717	120.986	0.00101405	0.000388331	2.6113
1312	Industrial Park	IP1312	North China	Shanxi		37.1406	111.876	37.135	111.86	37.1472	111.892	0.00134901	0.00144708	0.93223
1313	Industrial Hotspot	IH1313	North China	Shanxi		38.1798	112.701	38.1798	112.701	38.1798	112.701	0.000742717	0.000143447	5.17764
1314	Industrial Hotspot	IH1314	Southwest China	Sichuan		31.2752	106.29	31.2752	106.29	31.2752	106.29	0.000637214	3.95727e-05	16.1024
1315	Industrial Hotspot	IH1315	North China	Gansu		37.1516	104.082	37.1516	104.082	37.1516	104.082	0.000139312	5.17948e-05	2.68968
1316	Industrial Park	IP1316	Northwest China	Xinjiang		42.7065	93.4357	42.6946	93.4069	42.718	93.465	0.000170544	4.42419e-05	3.8548
1317	Industrial Park	IP1317	Northwest China	Xinjiang		43.8643	87.3686	43.8491	87.3404	43.8738	87.3875	0.00382756	0.000589791	6.48969
1318	Industrial Hotspot	IH1318	North China	Shanxi		36.1532	111.486	36.1532	111.486	36.1532	111.486	0.0010921	0.000173023	6.31186
1319	Industrial Hotspot	IH1319	North China	Liaoning		41.3544	123.503	41.3544	123.503	41.3544	123.503	0.000940087	0.000554996	1.69386
1320	Industrial Hotspot	IH1320	North China	Liaoning		39.4725	121.626	39.4725	121.626	39.4725	121.626	0.000448518	6.33056e-05	7.08496
1321	Industrial Park	IP1321	North China	Shandong		37.5286	118.235	37.5091	118.225	37.5448	118.244	0.000932947	0.000164839	5.65976
1322	Industrial Hotspot	IH1322	North China	Shandong		34.9772	117.479	34.9772	117.479	34.9772	117.479	0.00080565	0.000336569	2.39372
1323	Industrial Park	IP1323	North China	Inner Mongolia		41.3139	112.657	41.3051	112.651	41.3217	112.664	0.000113988	7.57118e-05	1.50556
1324	Industrial Park	IP1324	North China	Shaanxi		39.0087	110.249	38.9878	110.228	39.0339	110.272	0.000659237	0.000103789	6.35172
1325	Industrial Park	IP1325	North China	Inner Mongolia		41.4448	113.126	41.432	113.116	41.4573	113.14	0.000276581	0.000126368	2.18869
1326	Industrial Hotspot	IH1326	Northeast China	Jilin		43.208	124.392	43.208	124.392	43.208	124.392	0.000694729	0.000656748	1.05783
1327	Industrial Park	IP1327	North China	Inner Mongolia		39.3531	110.39	39.3425	110.375	39.3631	110.404	0.000595761	6.98636e-05	8.52749
1328	Industrial Park	IP1328	North China	Shandong		36.8435	119.358	36.8322	119.346	36.855	119.371	0.000799481	0.000304792	2.62304
1329	Industrial Park	IP1329	North China	Henan		35.8755	114.332	35.8673	114.323	35.883	114.343	0.00138308	0.000152018	9.09809
1330	Industrial Hotspot	IH1330	Northwest China	Xinjiang		43.2836	81.8535	43.2836	81.8535	43.2836	81.8535	5.48849e-05	4.45726e-07	123.136
1331	Industrial Hotspot	IH1331	Northwest China	Xinjiang		43.6743	81.1742	43.6743	81.1742	43.6743	81.1742	0.000138215	1.35391e-06	102.085
1332	Industrial Hotspot	IH1332	East China	Anhui		31.5026	118.383	31.5026	118.383	31.5026	118.383	0.00147541	0.000954306	1.54606
1333	Industrial Park	IP1333	North China	Jiangsu		34.8074	119.109	34.7959	119.094	34.8254	119.13	0.000913333	0.000171178	5.33558
1334	Industrial Park	IP1334	North China	Shandong		35.1539	119.277	35.1432	119.269	35.167	119.286	0.00140303	0.000182264	7.69777
1335	Industrial Park	IP1335	North China	Shandong		38.0188	117.975	38.0031	117.949	38.0432	117.99	0.000875617	4.78661e-05	18.2931
1336	Industrial Hotspot	IH1336	North China	Hebei		39.7931	117.977	39.7941	117.979	39.7941	117.979	0.00155919	0.000296669	5.25567
1337	Industrial Hotspot	IH1337	North China	Shandong		37.0726	119.765	37.0726	119.765	37.0726	119.765	0.000646722	0.000406279	1.59182
1338	Industrial Park	IP1338	North China	Shandong		36.9707	118.545	36.9591	118.531	36.9809	118.557	0.000942127	0.000529719	1.77854
1339	Industrial Hotspot	IH1339	North China	Inner Mongolia		42.0156	118.975	42.0156	118.975	42.0156	118.975	0.000221911	0.000112812	1.96708
1340	Industrial Hotspot	IH1340	East China	Hunan		29.3105	111.315	29.3105	111.315	29.3105	111.315	0.000517186	1.84606e-05	28.0157
1341	Industrial Hotspot	IH1341	Northwest China	Xinjiang		41.4265	83.573	41.4265	83.573	41.4265	83.573	7.15477e-05	1.90655e-06	37.5273
1342	Industrial Park	IP1342	North China	Liaoning		40.7552	121.989	40.7356	121.95	40.781	122.041	0.000847805	0.000164527	5.15298
1343	Industrial Hotspot	IH1343	North China	Liaoning		39.3846	121.908	39.3846	121.908	39.3846	121.908	0.000300525	0.000856511	0.350871
1344	Industrial Hotspot	IH1344	East China	Fujian		26.5667	118.291	26.5667	118.291	26.5667	118.291	0.00020579	1.00331e-05	20.5111
1345	Industrial Park	IP1345	Northwest China	Shaanxi	Shengbang	38.721	110.171	38.6717	110.144	38.765	110.217	0.000482425	0.000116622	4.13664
1346	Industrial Hotspot	IH1346	North China	Inner Mongolia		38.3812	105.691	38.3812	105.691	38.3812	105.691	0.000189161	9.82054e-06	19.2617
1347	Industrial Park	IP1347	North China	Hebei		40.76	114.996	40.7539	114.973	40.7676	115.009	0.000797297	0.000395697	2.01492
1348	Industrial Hotspot	IH1348	North China	Liaoning		39.4607	121.755	39.4607	121.755	39.4607	121.755	0.000439695	0.000539229	0.815413
1349	Industrial Hotspot	IH1349	North China	Hebei		37.3854	114.685	37.3854	114.685	37.3854	114.685	0.00146958	0.000235076	6.25152
1350	Industrial Park	IP1350	North China	Hebei		39.9472	118.037	39.9395	118.03	39.9586	118.046	0.00173059	0.000571829	3.02642
1351	Industrial Park	IP1351	North China	Liaoning		40.6452	122.19	40.6279	122.173	40.6658	122.201	0.000916574	0.000652303	1.40514
1352	Industrial Hotspot	IH1352	North China	Liaoning		41.3614	123.712	41.3614	123.712	41.3614	123.712	0.00174522	0.000744677	2.34359
1353	Industrial Hotspot	IH1353	North China	Liaoning		40.5021	123.946	40.5021	123.946	40.5021	123.946	0.000642462	7.57349e-06	84.8304
1354	Industrial Hotspot	IH1354	North China	Liaoning		39.6417	122.07	39.6417	122.07	39.6417	122.07	0.000342469	0.00146856	0.2332
1355	Industrial Park	IP1355	North China	Shandong		37.0828	118.391	37.0709	118.367	37.1077	118.424	0.00108881	0.000668558	1.6286
1356	Industrial Park	IP1356	Northwest China	Xinjiang		41.761	82.9192	41.7457	82.9031	41.7787	82.9347	0.00020014	9.41726e-05	2.12524
1357	Industrial Hotspot	IH1357	East China	Jiangsu		31.358	119.581	31.358	119.581	31.358	119.581	0.00128239	0.000314072	4.0831
1358	Industrial Hotspot	IH1358	North China	Hebei		38.182	114.233	38.182	114.233	38.182	114.233	0.00182831	0.000482425	3.78983
1359	Industrial Hotspot	IH1359	North China	Inner Mongolia		39.3553	106.84	39.3553	106.84	39.3553	106.84	0.000718275	0.000843324	0.851719
1360	Industrial Hotspot	IH1360	Northeast China	Jilin		43.8827	125.187	43.8827	125.187	43.8827	125.187	0.00122631	0.00085993	1.42605
1361	Industrial Hotspot	IH1361	North China	Qinghai		36.7162	101.192	36.7162	101.192	36.7162	101.192	0.00018907	6.86542e-06	27.5395
1362	Industrial Hotspot	IH1362	Northeast China	Inner Mongolia		44.614	117.662	44.614	117.662	44.614	117.662	9.09997e-05	0.000206899	0.439827
1363	Industrial Hotspot	IH1363	North China	Hebei		40.0207	116.825	40.0207	116.825	40.0207	116.825	0.00141707	0.000281603	5.03217
1364	Industrial Hotspot	IH1364	North China	Henan		34.7187	111.953	34.7187	111.953	34.7187	111.953	0.00103702	0.000269535	3.84743
1365	Industrial Hotspot	IH1365	North China	Henan		33.1002	111.488	33.1002	111.488	33.1002	111.488	0.000572053	3.39891e-05	16.8305
1366	Industrial Park	IP1366	North China	Henan		33.1185	112.6	33.1127	112.593	33.1259	112.608	0.000914217	0.000205534	4.44801
1367	Industrial Hotspot	IH1367	North China	Henan		34.1593	112.403	34.1593	112.403	34.1593	112.403	0.000939616	4.45736e-05	21.0801
1368	Industrial Hotspot	IH1368	East China	Hunan		28.0822	113.043	28.0822	113.043	28.0822	113.043	0.000962284	0.000966749	0.995381
1369	Industrial Park	IP1369	North China	Henan		35.8751	114.15	35.8693	114.132	35.8799	114.159	0.00168308	0.000404479	4.16111
1370	Industrial Hotspot	IH1370	North China	Shandong		35.361	116.377	35.361	116.377	35.361	116.377	0.00107551	0.000320904	3.35151
1371	Industrial Hotspot	IH1371	East China	Hunan		28.2716	112.279	28.2716	112.279	28.2716	112.279	0.000969637	9.39193e-05	10.3241
1372	Industrial Hotspot	IH1372	Northeast China	Heilongjiang		45.4166	127.492	45.4166	127.492	45.4166	127.492	5.00024e-05	1.44514e-05	3.46005
1373	Industrial Hotspot	IH1373	Northeast China	Heilongjiang		45.7299	127.167	45.7299	127.167	45.7299	127.167	0.000108855	8.3548e-05	1.3029
1374	Industrial Hotspot	IH1374	North China	Hebei		39.6666	117.918	39.6666	117.918	39.6666	117.918	0.00173903	0.000128851	13.4964
1375	Industrial Hotspot	IH1375	North China	Hebei		39.8478	117.902	39.8478	117.902	39.8478	117.902	0.00151604	0.000283871	5.3406
1376	Industrial Park	IP1376	North China	Hebei		39.2047	118.966	39.1832	118.953	39.2164	119.007	0.00122293	2.19708e-05	55.6614
1377	Industrial Park	IP1377	North China	Shandong		37.1773	121.603	37.1701	121.593	37.1871	121.617	0.000345983	0.000119156	2.90361
1378	Industrial Park	IP1378	East China	Jiangxi		28.337	117.875	28.329	117.869	28.3478	117.883	0.000481545	0.000171516	2.80758
1379	Industrial Hotspot	IH1379	Northeast China	Heilongjiang		44.4264	129.483	44.4264	129.483	44.4264	129.483	0.000197411	7.26595e-05	2.71693
1380	Industrial Hotspot	IH1380	North China	Hebei		40.1353	118.57	40.1353	118.57	40.1353	118.57	0.00201053	0.00179154	1.12224
1381	Industrial Hotspot	IH1381	Northwest China	Xinjiang		44.2139	86.0241	44.2139	86.0241	44.2139	86.0241	0.00104549	3.16937e-05	32.9875
1382	Industrial Hotspot	IH1382	North China	Shanxi		37.9945	113.566	37.9945	113.566	37.9945	113.566	0.0014398	0.00106864	1.34732
1383	Industrial Hotspot	IH1383	North China	Shanxi		36.2979	113.139	36.2979	113.139	36.2979	113.139	0.000758634	0.000692321	1.09578
1384	Industrial Hotspot	IH1384	North China	Inner Mongolia		42.2025	118.895	42.2025	118.895	42.2025	118.895	0.000257624	0.000130891	1.96823
1385	Industrial Hotspot	IH1385	North China	Liaoning		40.8029	122.208	40.8029	122.208	40.8029	122.208	0.000719449	0.000201942	3.56265
1386	Industrial Park	IP1386	North China	Liaoning		41.0529	122.831	41.0478	122.825	41.06	122.84	0.00156854	0.00174204	0.900407
1387	Industrial Hotspot	IH1387	North China	Liaoning		41.6927	123.824	41.6927	123.824	41.6927	123.824	0.00058658	1.82822e-05	32.0847
1388	Industrial Hotspot	IH1388	North China	Shandong		37.5472	121.304	37.5472	121.304	37.5472	121.304	0.000608974	0.00209757	0.290324
1389	Industrial Park	IP1389	East China	Shanghai		30.7054	121.288	30.694	121.272	30.7166	121.303	0.000828107	0.000281668	2.94001
1390	Industrial Hotspot	IH1390	North China	Inner Mongolia		39.4344	106.839	39.4344	106.839	39.4344	106.839	0.00087651	0.000843324	1.03935
1391	Industrial Park	IP1391	North China	Hebei		38.362	117.634	38.3575	117.618	38.3667	117.651	0.000863072	1.20067e-05	71.8825
1392	Industrial Park	IP1392	North China	Shanxi		39.5423	112.316	39.5321	112.297	39.5539	112.335	0.00113865	0.000353735	3.21894
1393	Industrial Hotspot	IH1393	North China	Shaanxi		39.1817	110.529	39.1817	110.529	39.1817	110.529	0.000567208	0.000103044	5.50454
1394	Industrial Hotspot	IH1394	Northwest China	Xinjiang		44.2817	85.6316	44.2817	85.6316	44.2817	85.6316	0.000735043	6.63425e-05	11.0795
1395	Industrial Park	IP1395	North China	Henan		34.3714	113.062	34.3683	113.053	34.377	113.069	0.00128025	0.000370661	3.45398
1396	Industrial Hotspot	IH1396	North China	Tianjin		39.105	117.604	39.105	117.604	39.105	117.604	0.00147934	0.000145775	10.1481
1397	Industrial Hotspot	IH1397	North China	Inner Mongolia		39.3312	106.819	39.3312	106.819	39.3312	106.819	0.000602808	0.000843324	0.714801
1398	Industrial Hotspot	IH1398	North China	Jiangsu		34.6095	119.447	34.6095	119.447	34.6095	119.447	0.000717078	0.000138277	5.18581
1399	Industrial Park	IP1399	North China	Jiangsu		34.5534	119.595	34.5414	119.576	34.5704	119.626	0.000610826	8.67642e-07	704.007
1400	Industrial Hotspot	IH1400	East China	Guizhou		27.1405	108.772	27.1405	108.772	27.1405	108.772	0.00023953	4.95673e-05	4.83243
1401	Industrial Hotspot	IH1401	North China	Ningxia		38.4445	106.125	38.4445	106.125	38.4445	106.125	0.000639202	0.00176571	0.362008
1402	Industrial Hotspot	IH1402	East China	Hubei		30.6562	114.866	30.6562	114.866	30.6562	114.866	0.000710555	7.31225e-05	9.71732
1403	Industrial Hotspot	IH1403	East China	Hubei		31.6908	113.419	31.6908	113.419	31.6908	113.419	0.000712724	0.000121619	5.86031
1404	Industrial Park	IP1404	North China	Inner Mongolia		40.7347	111.749	40.7263	111.735	40.7474	111.764	0.000555445	0.000121833	4.55906
1405	Industrial Hotspot	IH1405	North China	Hebei		40.5555	117.751	40.5555	117.751	40.5555	117.751	0.000317984	2.80216e-05	11.3478
1406	Industrial Park	IP1406	East China	Zhejiang		29.2778	119.295	29.2671	119.293	29.2863	119.298	0.000704367	7.34078e-05	9.59526
1407	Industrial Park	IP1407	East China	Hunan		29.4108	113.145	29.4044	113.133	29.4202	113.157	0.0010869	0.000631083	1.72227
1408	Industrial Hotspot	IH1408	East China	Anhui		31.4467	118.305	31.4467	118.305	31.4467	118.305	0.00137757	0.00169345	0.813471
1409	Industrial Park	IP1409	East China	Jiangsu		32.1844	119.265	32.1756	119.243	32.1955	119.294	0.00126112	0.000630011	2.00174
1410	Industrial Hotspot	IH1410	East China	Jiangsu		31.6503	119.916	31.6503	119.916	31.6503	119.916	0.00161524	0.000288487	5.59898
1411	Industrial Hotspot	IH1411	North China	Liaoning		40.9028	124.023	40.9028	124.023	40.9028	124.023	0.000401439	2.02812e-05	19.7937
1412	Industrial Park	IP1412	Northwest China	Qinghai	Baitong	36.5484	101.51	36.5066	101.464	36.5908	101.551	0.000434202	0.000371662	1.16827
1413	Industrial Park	IP1413	North China	Shandong		34.8607	118.227	34.8523	118.217	34.8708	118.238	0.000898225	0.000197392	4.55046
1414	Industrial Hotspot	IH1414	Northeast China	Heilongjiang		44.5957	129.65	44.5957	129.65	44.5957	129.65	0.000159956	0.000664813	0.240603
1415	Industrial Hotspot	IH1415	Northwest China	Xinjiang		43.9638	80.6068	43.9638	80.6068	43.9638	80.6068	0.000285977	2.5522e-06	112.051
1416	Industrial Hotspot	IH1416	East China	Hubei		30.5337	114.824	30.5337	114.824	30.5337	114.824	0.000984362	7.31225e-05	13.4618
1417	Industrial Hotspot	IH1417	Northeast China	Jilin		43.1749	124.397	43.1749	124.397	43.1749	124.397	0.000619727	0.000656748	0.94363
1418	Industrial Hotspot	IH1418	North China	Inner Mongolia		38.3598	105.706	38.3598	105.706	38.3598	105.706	0.000171468	9.82054e-06	17.4601
1419	Industrial Hotspot	IH1419	Northwest China	Xinjiang		44.0785	88.5879	44.0785	88.5879	44.0785	88.5879	0.000382713	2.0832e-05	18.3714
1420	Industrial Park	IP1420	East China	Jiangsu		30.9113	120.687	30.9	120.677	30.9238	120.702	0.00102768	0.000770352	1.33404
1421	Industrial Park	IP1421	North China	Jiangsu		33.6049	119.606	33.5979	119.6	33.6144	119.612	0.000627806	6.48638e-05	9.67884
1422	Industrial Park	IP1422	North China	Shandong		37.0359	117.635	37.0293	117.629	37.0456	117.641	0.00121349	0.000135415	8.96122
1423	Industrial Hotspot	IH1423	Southwest China	Yunnan		24.846	99.6371	24.846	99.6371	24.846	99.6371	5.50216e-05	2.71196e-05	2.02885
1424	Industrial Hotspot	IH1424	Southwest China	Yunnan		25.0242	102.312	25.0242	102.312	25.0242	102.312	0.000212735	2.81922e-05	7.5459
1425	Industrial Hotspot	IH1425	North China	Hebei		39.8179	117.972	39.8179	117.972	39.8179	117.972	0.001596	0.000283871	5.62226
1426	Industrial Park	IP1426	North China	Liaoning		41.2233	123.335	41.2168	123.329	41.2323	123.344	0.000408429	7.25159e-05	5.63226
1427	Industrial Hotspot	IH1427	North China	Shanxi		36.3456	111.195	36.3456	111.195	36.3456	111.195	0.00045284	0.000109673	4.129
1428	Industrial Hotspot	IH1428	Northwest China	Xinjiang		44.0944	88.5941	44.0944	88.5941	44.0944	88.5941	0.000415173	2.0832e-05	19.9296
1429	Industrial Park	IP1429	Southwest China	Sichuan		30.3794	103.719	30.3662	103.7	30.4002	103.742	0.000851564	7.98732e-05	10.6614
1430	Industrial Hotspot	IH1430	North China	Shandong		36.191	116.891	36.191	116.891	36.191	116.891	0.00113902	0.000411567	2.76751
1431	Industrial Hotspot	IH1431	Northeast China	Heilongjiang		47.2855	132.078	47.2855	132.078	47.2855	132.078	0.000142276	4.22687e-05	3.36599
1432	Industrial Park	IP1432	North China	Liaoning		40.6773	122.685	40.6693	122.676	40.6873	122.698	0.000851009	0.000413211	2.0595
1433	Industrial Park	IP1433	East China	Jiangsu		30.8691	120.657	30.8596	120.645	30.8788	120.67	0.0010522	0.000770352	1.36587
1434	Industrial Hotspot	IH1434	Southwest China	Guizhou		26.9341	106.676	26.9341	106.676	26.9341	106.676	0.000328252	0.000130243	2.5203
1435	Industrial Park	IP1435	East China	Jiangsu		32.028	119.576	32.0126	119.471	32.0463	119.606	0.0012873	0.000585274	2.19949
1436	Industrial Hotspot	IH1436	East China	Anhui		31.3659	118.498	31.3659	118.498	31.3659	118.498	0.000952267	0.00104321	0.912824
1437	Industrial Hotspot	IH1437	North China	Hebei		39.5381	118.106	39.5381	118.106	39.5381	118.106	0.00184529	0.00471939	0.391002
1438	Industrial Hotspot	IH1438	North China	Hebei		39.9156	118.525	39.9156	118.525	39.9156	118.525	0.00212335	0.00201201	1.05533
1439	Industrial Park	IP1439	North China	Liaoning		41.2209	123.026	41.2162	123.013	41.2265	123.038	0.00180772	0.00158812	1.13828
1440	Industrial Hotspot	IH1440	East China	Jiangxi		27.9215	113.888	27.9215	113.888	27.9215	113.888	0.00037807	7.96409e-05	4.74719
1441	Industrial Park	IP1441	Southwest China	Sichuan		30.3634	103.855	30.3563	103.843	30.3773	103.864	0.000978942	0.000253588	3.86037
1442	Industrial Hotspot	IH1442	Northeast China	Inner Mongolia		44.4563	118.926	44.4563	118.926	44.4563	118.926	7.76992e-05	4.1588e-06	18.6831
1443	Industrial Hotspot	IH1443	North China	Hebei		39.2873	115.343	39.2873	115.343	39.2873	115.343	0.00143852	2.43257e-05	59.1357
1444	Industrial Hotspot	IH1444	North China	Shaanxi		34.2005	107.77	34.2005	107.77	34.2005	107.77	0.000855812	5.41644e-05	15.8003
1445	Industrial Park	IP1445	Southwest China	Sichuan		26.6017	101.503	26.5956	101.495	26.6122	101.513	0.000299926	0.000381054	0.787096
1446	Industrial Park	IP1446	North China	Tianjin		38.8247	117.407	38.811	117.37	38.84	117.438	0.00130458	0.000676532	1.92833
1447	Industrial Hotspot	IH1447	North China	Inner Mongolia		39.4354	106.819	39.4354	106.819	39.4354	106.819	0.00089336	0.000843324	1.05933
1448	Industrial Park	IP1448	East China	Anhui		31.1401	118.01	31.1312	118.002	31.1519	118.016	0.00144227	0.000204882	7.03955
1449	Industrial Park	IP1449	East China	Jiangxi		29.736	116.061	29.7302	116.051	29.7454	116.073	0.00102999	0.000259012	3.97659
1450	Industrial Park	IP1450	East China	Jiangsu		30.8776	120.582	30.863	120.554	30.8908	120.612	0.00128336	0.000770352	1.66594
1451	Industrial Hotspot	IH1451	North China	Henan		36.0774	116.082	36.0774	116.082	36.0774	116.082	0.00100277	0.000108747	9.22114
1452	Industrial Park	IP1452	East China	Jiangsu		32.2657	119.102	32.2624	119.09	32.2715	119.116	0.0014515	0.000341794	4.24672
1453	Industrial Park	IP1453	Northwest China	Xinjiang		43.9877	81.6773	43.9818	81.6625	43.9956	81.6907	2.97858e-05	5.24e-05	0.568431
1454	Industrial Hotspot	IH1454	Northwest China	Xinjiang		41.2833	83.286	41.2833	83.286	41.2833	83.286	7.25126e-05	5.54062e-06	13.0875
1455	Industrial Hotspot	IH1455	North China	Shanxi		37.5677	111.979	37.5677	111.979	37.5677	111.979	0.00144669	1.89234e-05	76.4501
1456	Industrial Park	IP1456	North China	Shanxi		38.5148	112.965	38.5092	112.957	38.5232	112.972	0.000871206	5.87524e-05	14.8284
1457	Industrial Park	IP1457	North China	Hebei		36.8208	114.19	36.8144	114.182	36.83	114.199	0.00209161	0.000102645	20.3771
1458	Industrial Hotspot	IH1458	Northeast China	Heilongjiang		45.3583	130.968	45.3583	130.968	45.3583	130.968	0.000499539	0.000480223	1.04022
1459	Industrial Hotspot	IH1459	Northeast China	Heilongjiang		46.4484	127.114	46.4484	127.114	46.4484	127.114	0.000331457	4.09584e-05	8.09252
1460	Industrial Park	IP1460	Northeast China	Heilongjiang		46.5273	125.092	46.5136	125.072	46.5444	125.116	0.000373626	0.00340992	0.10957
1461	Industrial Hotspot	IH1461	North China	Hebei		38.4364	117.582	38.4364	117.582	38.4364	117.582	0.000957083	1.20067e-05	79.7124
1462	Industrial Hotspot	IH1462	North China	Inner Mongolia		39.6141	106.903	39.6141	106.903	39.6141	106.903	0.000138153	0.00100378	0.137633
1463	Industrial Park	IP1463	Northeast China	Heilongjiang		44.5748	129.635	44.5671	129.63	44.585	129.642	6.19921e-05	0.000664813	0.0932475
1464	Industrial Hotspot	IH1464	North China	Shandong		38.1129	118.909	38.1129	118.909	38.1129	118.909	0.000656526	1.25564e-05	52.2861
1465	Industrial Hotspot	IH1465	Northwest China	Xinjiang		43.7496	87.2242	43.7496	87.2242	43.7496	87.2242	0.00157145	2.92405e-05	53.7422
1466	Industrial Hotspot	IH1466	East China	Zhejiang		30.0641	119.903	30.0641	119.903	30.0641	119.903	0.0021101	0.000291173	7.24688
1467	Industrial Hotspot	IH1467	Northwest China	Gansu		41.0731	95.4357	41.0731	95.4357	41.0731	95.4357	4.19729e-05	1.27502e-05	3.29193
1468	Industrial Park	IP1468	North China	Liaoning		40.6896	122.717	40.6841	122.708	40.6981	122.727	0.000772476	0.000413211	1.86945
1469	Industrial Hotspot	IH1469	Southwest China	Chongqing		29.5499	106.542	29.5499	106.542	29.5499	106.542	0.00184485	0.00136857	1.34801
1470	Industrial Park	IP1470	Southwest China	Chongqing		29.3884	106.002	29.3815	105.993	29.3972	106.012	0.00164565	0.000228139	7.21336
1471	Industrial Hotspot	IH1471	Southwest China	Sichuan		28.8678	105.526	28.8678	105.526	28.8678	105.526	0.00105174	2.755e-05	38.1755
1472	Industrial Park	IP1472	Northeast China	Inner Mongolia		43.5463	118.055	43.5318	118.044	43.5631	118.082	4.37786e-05	7.63761e-05	0.573197
1473	Industrial Park	IP1473	North China	Hebei		39.3087	119.089	39.2866	119.06	39.3335	119.111	0.00117333	2.71886e-05	43.1552
1474	Industrial Park	IP1474	Northwest China	Xinjiang		43.0832	90.4431	43.0705	90.4124	43.0958	90.4682	0.000139606	5.82123e-05	2.39821
1475	Industrial Hotspot	IH1475	North China	Shaanxi		34.1681	108.823	34.1681	108.823	34.1681	108.823	0.00223708	0.000688255	3.25037
1476	Industrial Hotspot	IH1476	North China	Shanxi		37.6719	112.664	37.6719	112.664	37.6719	112.664	0.00097651	0.000688823	1.41765
1477	Industrial Hotspot	IH1477	East China	Jiangsu		32.2645	119.593	32.2645	119.593	32.2645	119.593	0.00123006	0.000443235	2.77519
1478	Industrial Hotspot	IH1478	North China	Liaoning		39.4622	121.685	39.4622	121.685	39.4622	121.685	0.00057659	6.33056e-05	9.10805
1479	Industrial Park	IP1479	North China	Inner Mongolia		41.304	108.527	41.2974	108.506	41.312	108.55	0.0002966	1.06526e-05	27.843
1480	Industrial Park	IP1480	North China	Shanxi		39.7511	113.022	39.7406	113.014	39.7602	113.03	0.000664142	0.000404775	1.64077
1481	Industrial Hotspot	IH1481	East China	Anhui		32.6091	116.889	32.6091	116.889	32.6091	116.889	0.00104494	0.000520603	2.00718
1482	Industrial Park	IP1482	North China	Shaanxi		37.5785	108.832	37.5728	108.824	37.5886	108.842	0.000204063	0.000247114	0.825784
1483	Industrial Hotspot	IH1483	North China	Shanxi		35.8462	111.269	35.8462	111.269	35.8462	111.269	0.00124042	0.000246998	5.02198
1484	Industrial Park	IP1484	East China	Zhejiang		30.041	121.624	30.0245	121.608	30.0672	121.647	0.000966365	4.03257e-05	23.964
1485	Industrial Hotspot	IH1485	North China	Liaoning		41.4486	120.04	41.4486	120.04	41.4486	120.04	0.000564665	1.05622e-05	53.4612
1486	Industrial Park	IP1486	North China	Shandong		35.357	115.129	35.3523	115.116	35.3623	115.14	0.00099291	0.00023823	4.16786
1487	Industrial Hotspot	IH1487	Northwest China	Xinjiang		41.8029	83.5504	41.8029	83.5504	41.8029	83.5504	9.71952e-05	1.64028e-06	59.2553
1488	Industrial Hotspot	IH1488	East China	Zhejiang		31.0804	119.931	31.0804	119.931	31.0804	119.931	0.00138823	0.000185877	7.46853
1489	Industrial Park	IP1489	Northwest China	Xinjiang		44.3564	84.8522	44.3385	84.8232	44.3864	84.8883	0.000741884	0.00130765	0.567342
1490	Industrial Hotspot	IH1490	Northeast China	Inner Mongolia		44.4978	117.59	44.4978	117.59	44.4978	117.59	3.39884e-05	7.66668e-05	0.443326
1491	Industrial Hotspot	IH1491	South China	Guangxi		23.9782	111.74	23.9782	111.74	23.9782	111.74	0.000453132	1.12854e-05	40.1521
1492	Industrial Park	IP1492	South China	Guangdong		23.5103	113.101	23.5036	113.095	23.5209	113.106	0.000849277	0.000228923	3.70987
1493	Industrial Hotspot	IH1493	Southwest China	Yunnan		24.3992	98.4477	24.3992	98.4477	24.3992	98.4477	0.000186866	6.09941e-06	30.6367
1494	Industrial Park	IP1494	East China	Hubei		30.483	114.219	30.4751	114.211	30.4916	114.228	0.00162997	0.000109563	14.8771
1495	Industrial Park	IP1495	North China	Qinghai		36.8999	101.749	36.8903	101.737	36.9084	101.758	0.000249508	0.000163752	1.52369
1496	Industrial Hotspot	IH1496	North China	Gansu		36.7051	102.91	36.7051	102.91	36.7051	102.91	0.000267419	2.86966e-05	9.31882
1497	Industrial Hotspot	IH1497	East China	Zhejiang		28.1275	120.353	28.1275	120.353	28.1275	120.353	0.000506034	9.95929e-05	5.08102
1498	Industrial Park	IP1498	East China	Zhejiang		29.7777	120.843	29.7696	120.837	29.7859	120.849	0.000873348	0.000105468	8.2807
1499	Industrial Hotspot	IH1499	East China	Jiangsu		31.059	120.842	31.059	120.842	31.059	120.842	0.00103197	0.000157333	6.55915
1500	Industrial Park	IP1500	East China	Jiangsu		31.0219	120.8	31.0112	120.787	31.0331	120.814	0.00109051	0.000157333	6.93121
1501	Industrial Park	IP1501	East China	Anhui		31.3833	118.41	31.3787	118.392	31.3904	118.429	0.00101473	0.00169345	0.599208
1502	Industrial Park	IP1502	East China	Jiangsu		32.3291	119.807	32.3233	119.796	32.334	119.817	0.000987583	0.000865583	1.14095
1503	Industrial Hotspot	IH1503	East China	Shanghai		31.0658	121.874	31.0658	121.874	31.0658	121.874	0.000559747	0.000217635	2.57196
1504	Industrial Park	IP1504	East China	Zhejiang		30.3318	120.828	30.3204	120.82	30.3468	120.837	0.000803652	8.91938e-05	9.01017
1505	Industrial Park	IP1505	North China	Inner Mongolia		39.5123	106.579	39.5019	106.569	39.5254	106.595	0.000937631	0.000150146	6.2448
1506	Industrial Hotspot	IH1506	East China	Hunan		29.4853	111.937	29.4853	111.937	29.4853	111.937	0.000694104	2.20835e-05	31.4309
1507	Industrial Hotspot	IH1507	East China	Hubei		30.5157	111.428	30.5157	111.428	30.5157	111.428	0.000659942	0.000848145	0.778101
1508	Industrial Hotspot	IH1508	North China	Hebei		38.3915	114.337	38.3915	114.337	38.3915	114.337	0.00151474	0.000200138	7.5685
1509	Industrial Park	IP1509	North China	Shandong		37.0965	119.056	37.0905	119.04	37.1073	119.074	0.000637208	3.55897e-05	17.9043
1510	Industrial Hotspot	IH1510	East China	Hubei		30.4872	114.177	30.4872	114.177	30.4872	114.177	0.0015638	0.000170039	9.1967
1511	Industrial Park	IP1511	East China	Zhejiang		28.6898	121.366	28.6855	121.355	28.6923	121.377	0.000515502	0.000691287	0.745713
1512	Industrial Park	IP1512	East China	Jiangsu		32.168	118.867	32.1569	118.849	32.1783	118.888	0.00139706	0.00365801	0.381918
1513	Industrial Hotspot	IH1513	North China	Tianjin		38.935	117.209	38.935	117.209	38.935	117.209	0.00131041	7.27142e-05	18.0214
1514	Industrial Park	IP1514	Southwest China	Sichuan		28.8416	105.908	28.8325	105.902	28.8512	105.916	0.00107626	5.20526e-05	20.6765
1515	Industrial Park	IP1515	Southwest China	Sichuan		28.8538	105.92	28.8479	105.916	28.8599	105.926	0.000989771	5.20526e-05	19.0148
1516	Industrial Park	IP1516	East China	Shanghai		30.7895	121.452	30.7691	121.424	30.8219	121.483	0.000897803	0.000523385	1.71538
1517	Industrial Hotspot	IH1517	East China	Hubei		30.5895	114.67	30.5895	114.67	30.5895	114.67	0.00089905	0.000160161	5.6134
1518	Industrial Hotspot	IH1518	North China	Shaanxi		37.0053	109.842	37.0053	109.842	37.0053	109.842	0.000195986	5.16144e-05	3.79712
1519	Industrial Park	IP1519	North China	Inner Mongolia		40.6062	109.316	40.6001	109.302	40.6115	109.332	0.000879137	4.33255e-05	20.2915
1520	Industrial Park	IP1520	East China	Anhui		30.5368	117.166	30.527	117.152	30.548	117.178	0.000980877	0.000368818	2.65952
1521	Industrial Hotspot	IH1521	East China	Anhui		32.6191	116.905	32.6191	116.905	32.6191	116.905	0.00102416	0.000520603	1.96725
1522	Industrial Hotspot	IH1522	North China	Liaoning		39.4105	121.72	39.4105	121.72	39.4105	121.72	0.000499972	6.33056e-05	7.89775
1523	Industrial Hotspot	IH1523	East China	Jiangsu		30.9678	120.601	30.9678	120.601	30.9678	120.601	0.00134974	0.000770352	1.7521
1524	Industrial Hotspot	IH1524	East China	Hubei		30.8278	113.99	30.8278	113.99	30.8278	113.99	0.00117453	0.000129313	9.08284
1525	Industrial Hotspot	IH1525	Northeast China	Jilin		44.8439	124.043	44.8439	124.043	44.8439	124.043	0.000401972	0.000158054	2.54325
1526	Industrial Hotspot	IH1526	Southwest China	Sichuan		26.5819	101.854	26.5819	101.854	26.5819	101.854	0.000147468	0.000118688	1.24249
1527	Industrial Hotspot	IH1527	East China	Hunan		29.6364	113.326	29.6364	113.326	29.6364	113.326	0.0010233	4.70119e-05	21.7667
1528	Industrial Hotspot	IH1528	North China	Ningxia		38.2248	106.52	38.2248	106.52	38.2248	106.52	0.000627395	0.000274817	2.28295
1529	Industrial Park	IP1529	East China	Jiangsu		31.9792	120.562	31.9735	120.549	31.9868	120.577	0.00199427	0.00132966	1.49984
1530	Industrial Hotspot	IH1530	East China	Jiangsu		30.9256	120.647	30.9256	120.647	30.9256	120.647	0.00118933	0.000770352	1.54388
1531	Industrial Park	IP1531	East China	Zhejiang		29.7025	121.849	29.6882	121.84	29.7245	121.861	0.00081938	4.47572e-05	18.3072
1532	Industrial Hotspot	IH1532	North China	Shandong		36.0884	120.313	36.0884	120.313	36.0884	120.313	0.000698439	0.00407988	0.171191
1533	Industrial Hotspot	IH1533	Southwest China	Sichuan		29.2341	103.9	29.2341	103.9	29.2341	103.9	0.000701565	6.63564e-05	10.5727
1534	Industrial Hotspot	IH1534	North China	Inner Mongolia		39.5069	106.654	39.5069	106.654	39.5069	106.654	0.000873173	0.000252354	3.46012
1535	Industrial Park	IP1535	Southwest China	Sichuan		29.3822	103.81	29.3721	103.804	29.3938	103.816	0.000733762	9.39135e-05	7.81317
1536	Industrial Hotspot	IH1536	East China	Hunan		28.2721	110.145	28.2721	110.145	28.2721	110.145	0.000389082	6.36068e-06	61.1699
1537	Industrial Park	IP1537	North China	Shanxi		35.8359	112.959	35.8297	112.949	35.8439	112.971	0.000763356	0.000553287	1.37967
1538	Industrial Park	IP1538	North China	Shaanxi		39.1734	110.292	39.1677	110.269	39.1814	110.32	0.000975883	0.000109373	8.92251
1539	Industrial Hotspot	IH1539	Southwest China	Yunnan		25.8188	103.928	25.8188	103.928	25.8188	103.928	0.000101571	4.48113e-05	2.26665
1540	Industrial Park	IP1540	East China	Jiangsu		32.1397	119.933	32.1113	119.919	32.1758	119.948	0.00100809	0.000346963	2.90546
1541	Industrial Park	IP1541	East China	Hubei		30.2857	111.51	30.2835	111.502	30.2903	111.52	0.000638402	0.000135856	4.6991
1542	Industrial Hotspot	IH1542	North China	Hebei		36.6571	114.22	36.6571	114.22	36.6571	114.22	0.00172067	0.00105849	1.62559
1543	Industrial Hotspot	IH1543	East China	Hubei		30.6403	111.391	30.6403	111.391	30.6403	111.391	0.00058033	0.000848145	0.684235
1544	Industrial Hotspot	IH1544	North China	Gansu		36.8801	103.196	36.8801	103.196	36.8801	103.196	0.000319099	2.84245e-05	11.2262
1545	Industrial Hotspot	IH1545	Northwest China	Xinjiang		45.7264	85.3083	45.7264	85.3083	45.7264	85.3083	6.80653e-05	3.47346e-06	19.5959
1546	Industrial Hotspot	IH1546	North China	Inner Mongolia		40.9381	112.55	40.9381	112.55	40.9381	112.55	0.00039703	0.000222615	1.78348
1547	Industrial Park	IP1547	Southwest China	Guangxi		23.8367	106.66	23.83	106.648	23.8484	106.673	0.000201779	0.000109004	1.85111
1548	Industrial Park	IP1548	North China	Tianjin		39.2915	117.388	39.2793	117.378	39.3114	117.399	0.00164698	7.78092e-05	21.1669
1549	Industrial Park	IP1549	Northeast China	Inner Mongolia		43.9731	116.095	43.9582	116.082	43.986	116.11	0.000303082	0.000562028	0.539265
1550	Industrial Park	IP1550	North China	Liaoning		39.849	124.123	39.8383	124.113	39.8632	124.129	0.000466301	0.000301366	1.54729
1551	Industrial Hotspot	IH1551	East China	Zhejiang		30.1837	119.789	30.1837	119.789	30.1837	119.789	0.00120579	0.000291173	4.14115
1552	Industrial Hotspot	IH1552	North China	Hebei		39.6508	118.264	39.6508	118.264	39.6508	118.264	0.00134347	0.00195967	0.68556
1553	Industrial Park	IP1553	North China	Shaanxi		39.1665	110.356	39.1563	110.347	39.1784	110.367	0.000771983	0.000109373	7.05825
1554	Industrial Hotspot	IH1554	North China	Hebei		37.405	114.546	37.405	114.546	37.405	114.546	0.00162568	0.000235076	6.91558
1555	Industrial Hotspot	IH1555	North China	Inner Mongolia		41.0007	108.201	41.0007	108.201	41.0007	108.201	0.000281791	3.89865e-05	7.22792
1556	Industrial Hotspot	IH1556	North China	Tianjin		39.1106	117.024	39.1106	117.024	39.1106	117.024	0.00189137	0.00516353	0.366294
1557	Industrial Hotspot	IH1557	Southwest China	Sichuan		28.8095	104.383	28.8095	104.383	28.8095	104.383	0.000674996	1.40645e-05	47.9931
1558	Industrial Park	IP1558	East China	Anhui		31.4249	118.37	31.4141	118.364	31.441	118.382	0.00110875	0.00169345	0.65473
1559	Industrial Hotspot	IH1559	North China	Gansu		38.8403	100.175	38.8403	100.175	38.8403	100.175	0.000145531	6.28093e-06	23.1703
1560	Industrial Hotspot	IH1560	North China	Shaanxi		39.2711	111.06	39.2711	111.06	39.2711	111.06	0.000689459	0.000347702	1.9829
1561	Industrial Park	IP1561	North China	Shandong		37.5582	118.457	37.5519	118.446	37.5661	118.468	0.000947458	0.000154757	6.12223
1562	Industrial Hotspot	IH1562	North China	Henan		33.0775	111.8	33.0775	111.8	33.0775	111.8	0.000730517	8.21399e-05	8.89357
1563	Industrial Hotspot	IH1563	North China	Shaanxi		39.1002	110.697	39.1002	110.697	39.1002	110.697	0.00077911	0.000103044	7.56098
1564	Industrial Park	IP1564	North China	Shandong		36.7276	116.943	36.7229	116.927	36.7368	116.958	0.00216447	0.00154019	1.40532
1565	Industrial Park	IP1565	East China	Fujian		26.4861	119.654	26.478	119.629	26.4954	119.677	0.000182586	0.000104774	1.74266
1566	Industrial Hotspot	IH1566	Northeast China	Heilongjiang	Mudanjiang	44.6555	129.65	44.6555	129.65	44.6555	129.65	0.000751576	0.000664813	1.13051
1567	Industrial Hotspot	IH1567	South China	Guangxi		25.1039	109.344	25.1039	109.344	25.1039	109.344	0.00031143	3.82627e-05	8.13924
1568	Industrial Hotspot	IH1568	North China	Shanxi		38.1824	113.017	38.1824	113.017	38.1824	113.017	0.00112026	4.56452e-05	24.5427
1569	Industrial Hotspot	IH1569	North China	Gansu		37.0799	102.987	37.0799	102.987	37.0799	102.987	0.000276476	8.96241e-06	30.8484
1570	Industrial Hotspot	IH1570	North China	Inner Mongolia		41.3039	108.466	41.3039	108.466	41.3039	108.466	0.000266853	7.50611e-06	35.5514
1571	Industrial Hotspot	IH1571	South China	Guangdong		22.9054	113.261	22.9054	113.261	22.9054	113.261	0.000821039	0.000697904	1.17643
1572	Industrial Hotspot	IH1572	Northwest China	Xinjiang		44.1311	88.7253	44.1311	88.7253	44.1311	88.7253	0.000293404	2.0832e-05	14.0843
1573	Industrial Park	IP1573	South China	Guangxi		24.3923	109.589	24.3839	109.583	24.4006	109.596	0.000270535	4.41753e-05	6.12413
1574	Industrial Hotspot	IH1574	Northeast China	Liaoning		42.6563	123.353	42.6563	123.353	42.6563	123.353	0.00087778	0.000462939	1.8961
1575	Industrial Hotspot	IH1575	Southwest China	Yunnan		24.5428	97.7404	24.5428	97.7404	24.5428	97.7404	0.000140128	6.24715e-06	22.4307
1576	Industrial Hotspot	IH1576	East China	Fujian		26.6806	117.478	26.6806	117.478	26.6806	117.478	0.000132017	4.06479e-05	3.24781
1577	Industrial Hotspot	IH1577	South China	Guangxi		22.7809	108.32	22.7809	108.32	22.7809	108.32	0.00053767	0.000810372	0.663485
1578	Industrial Hotspot	IH1578	North China	Liaoning		39.2636	121.679	39.2636	121.679	39.2636	121.679	0.000398749	0.000213112	1.87108
1579	Industrial Hotspot	IH1579	South China	Guangxi		23.3313	110.887	23.3313	110.887	23.3313	110.887	0.000434822	3.07434e-05	14.1436
1580	Industrial Park	IP1580	East China	Jiangsu		31.4407	119.753	31.4311	119.748	31.4515	119.758	0.00176107	0.000513495	3.42957
1581	Industrial Hotspot	IH1581	North China	Shandong		37.1555	119.125	37.1555	119.125	37.1555	119.125	0.000498498	3.55897e-05	14.0068
1582	Industrial Park	IP1582	North China	Shandong		37.0268	119.109	37.0201	119.084	37.0362	119.131	0.000796152	3.55897e-05	22.3703
1583	Industrial Park	IP1583	North China	Liaoning		40.7392	122.844	40.7296	122.831	40.7565	122.857	0.000304711	8.79729e-05	3.46369
1584	Industrial Park	IP1584	North China	Shanxi		37.4689	112.061	37.4614	112.056	37.48	112.067	0.00113112	0.000229066	4.93799
1585	Industrial Hotspot	IH1585	Northwest China	Xinjiang		41.7391	83.6075	41.7391	83.6075	41.7391	83.6075	7.2091e-05	1.03019e-05	6.99781
1586	Industrial Hotspot	IH1586	Southwest China	Sichuan		27.015	102.151	27.015	102.151	27.015	102.151	0.000144218	3.29507e-05	4.37679
1587	Industrial Hotspot	IH1587	North China	Liaoning		41.9612	124.403	41.9612	124.403	41.9612	124.403	0.00125082	4.23e-05	29.5701
1588	Industrial Hotspot	IH1588	South China	Guangdong		24.5095	113.674	24.5095	113.674	24.5095	113.674	2.32102e-05	5.01299e-05	0.463
1589	Industrial Park	IP1589	North China	Shandong		36.9826	119.609	36.9696	119.595	37.003	119.625	0.000567357	0.000186661	3.03951
1590	Industrial Hotspot	IH1590	South China	Fujian		24.4728	117.95	24.4728	117.95	24.4728	117.95	0.000448293	0.000282145	1.58887
1591	Industrial Park	IP1591	South China	Fujian		24.6906	118.459	24.6784	118.452	24.7058	118.47	0.00023926	0.000411496	0.58144
1592	Industrial Park	IP1592	East China	Hunan		29.4483	113.155	29.4408	113.145	29.4594	113.169	0.00108852	0.000631083	1.72485
1593	Industrial Park	IP1593	East China	Hubei		32.042	112.087	32.0369	112.079	32.0462	112.097	0.00103346	0.00105435	0.980191
1594	Industrial Hotspot	IH1594	East China	Jiangsu		31.0004	120.748	31.0004	120.748	31.0004	120.748	0.0012471	0.000491775	2.53591
1595	Industrial Hotspot	IH1595	East China	Hunan		27.2471	113.418	27.2471	113.418	27.2471	113.418	0.000694369	9.36253e-05	7.41647
1596	Industrial Hotspot	IH1596	North China	Hebei		39.8595	118.197	39.8595	118.197	39.8595	118.197	0.00184348	0.000571829	3.22383
1597	Industrial Hotspot	IH1597	North China	Hebei		39.8157	118.235	39.8157	118.235	39.8157	118.235	0.00178483	0.000560719	3.1831
1598	Industrial Park	IP1598	North China	Shandong		38.0959	117.755	38.0843	117.736	38.1135	117.782	0.000974811	6.81612e-05	14.3016
1599	Industrial Park	IP1599	East China	Anhui		30.5134	117.249	30.5006	117.234	30.5431	117.264	0.000860292	0.000243658	3.53073
1600	Industrial Park	IP1600	Northwest China	Xinjiang		44.4284	86.0871	44.4066	86.0586	44.4627	86.116	0.00111435	0.00127182	0.876186
1601	Industrial Park	IP1601	North China	Liaoning		40.5627	122.277	40.5459	122.253	40.5892	122.309	0.00124285	0.000905125	1.37313
1602	Industrial Park	IP1602	North China	Liaoning		40.8335	121.031	40.8165	121.018	40.8545	121.05	0.00106867	0.000204038	5.23761
1603	Industrial Hotspot	IH1603	North China	Liaoning		39.3952	121.731	39.3952	121.731	39.3952	121.731	0.000528549	9.26836e-05	5.70273
1604	Industrial Park	IP1604	North China	Liaoning		41.2018	121.993	41.1907	121.978	41.2119	122.009	0.000704613	0.000662462	1.06363
1605	Industrial Hotspot	IH1605	Northwest China	Xinjiang		42.9446	89.3073	42.9446	89.3073	42.9446	89.3073	0.000246663	3.94887e-06	62.4642
1606	Industrial Park	IP1606	East China	Jiangsu		31.4836	119.719	31.4788	119.703	31.4876	119.73	0.00132959	0.000314072	4.2334
1607	Industrial Hotspot	IH1607	North China	Inner Mongolia		42.3037	119.362	42.3037	119.362	42.3037	119.362	3.13382e-05	0.000286256	0.109476
1608	Industrial Hotspot	IH1608	East China	Jiangxi		28.3002	116.975	28.3002	116.975	28.3002	116.975	0.000777299	5.08507e-05	15.2859
1609	Industrial Hotspot	IH1609	South China	Guangdong		22.8041	112.519	22.8041	112.519	22.8041	112.519	0.000630105	9.0256e-05	6.98131
1610	Industrial Park	IP1610	North China	Liaoning		40.1643	122.031	40.1544	122.012	40.1754	122.05	0.000813322	8.02663e-05	10.1328
1611	Industrial Park	IP1611	North China	Tianjin		38.982	117.256	38.9643	117.239	39.0033	117.281	0.00131356	0.00102755	1.27833
1612	Industrial Hotspot	IH1612	North China	Inner Mongolia		40.17	111.416	40.17	111.416	40.17	111.416	0.000477094	0.000223266	2.13688
1613	Industrial Hotspot	IH1613	North China	Inner Mongolia		39.9731	109.889	39.9731	109.889	39.9731	109.889	0.00066886	0.000440031	1.52003
1614	Industrial Hotspot	IH1614	South China	Guangdong		23.0264	112.011	23.0264	112.011	23.0264	112.011	0.000413175	2.6891e-05	15.3648
1615	Industrial Park	IP1615	East China	Jiangxi		25.7723	114.587	25.7571	114.563	25.7874	114.608	0.000250445	2.88987e-05	8.66631
1616	Industrial Park	IP1616	North China	Jiangsu		34.6661	119.2	34.6513	119.181	34.6827	119.217	0.00080932	0.000341712	2.36843
1617	Industrial Hotspot	IH1617	South China	Guangxi		23.435	110.065	23.435	110.065	23.435	110.065	0.000414599	9.48911e-05	4.36921
1618	Industrial Hotspot	IH1618	South China	Guangdong		23.0305	113.642	23.0305	113.642	23.0305	113.642	0.00120567	0.00140545	0.857854
1619	Industrial Hotspot	IH1619	East China	Hunan		26.4769	112.034	26.4769	112.034	26.4769	112.034	0.000564064	1.66746e-05	33.8277
1620	Industrial Hotspot	IH1620	North China	Hebei		40.1771	115.288	40.1771	115.288	40.1771	115.288	0.00154448	8.98078e-06	171.976
1621	Industrial Hotspot	IH1621	East China	Anhui		31.119	117.496	31.119	117.496	31.119	117.496	0.00178001	7.28948e-05	24.4189
1622	Industrial Hotspot	IH1622	Southwest China	Yunnan		24.9975	103.192	24.9975	103.192	24.9975	103.192	0.000388141	5.17073e-05	7.5065
1623	Industrial Park	IP1623	North China	Hebei	Xincheng	37.8602	115.326	37.852	115.321	37.8694	115.332	0.00116246	0.000180878	6.42678
1624	Industrial Park	IP1624	North China	Tianjin	Shidian	39.0715	117.002	39.0648	116.993	39.0788	117.012	0.00186783	0.00534949	0.34916
1625	Industrial Hotspot	IH1625	Northwest China	Liaoning	Hunhe	41.7349	123.2	41.7349	123.2	41.7349	123.2	0.00153212	0.00802761	0.190856

## Sheet: Cities
城市	City	E	MEIC	area(km²)	E/MEIC
深圳市	Shenzhen	0.000955642	0.00228469	2140	0.418282
厦门市	Xiamen	0.000426008	0.000770305	1768	0.553038
铁门关市	Tiemenguan	0.000113888	0.000195458	602	0.582675
嘉峪关市	Jiayuguan	0.000206614	0.000327567	1225	0.630752
银川市	Yinchuan	0.000408748	0.000629417	6759	0.649408
海口市	Haikou	0.000156491	0.000212488	2490	0.73647
东莞市	Dongguan	0.000883877	0.00116553	2466	0.758347
长春市	Changchun	0.000257557	0.000336221	20544	0.766035
天津市	Tianjin	0.000698474	0.000911149	12089	0.766586
南昌市	Nanchang	0.000325998	0.000421217	7213	0.773943
长沙市	Changsha	0.000354771	0.000457944	11833	0.774704
上海市	Shanghai	0.00100373	0.00128591	7792	0.780559
揭阳市	Jieyang	0.000163531	0.00020945	5309	0.78076
抚顺市	Fushun	0.000147856	0.000188289	11249	0.785262
辽阳市	Liaoyang	0.0004193	0.00052886	4703	0.792837
乌海市	Wuhai	0.000551893	0.000693945	1614	0.795298
兰州市	Lanzhou	0.000161308	0.000201133	13125	0.801997
温州市	Wenzhou	0.000178443	0.000218125	12252	0.818076
郑州市	Zhengzhou	0.00070198	0.000853507	7582	0.822466
南通市	Nantong	0.000358202	0.000434715	9839	0.823993
辽源市	Liaoyuan	0.000179996	0.000214037	5122	0.84096
绍兴市	Shaoxing	0.000402852	0.00047866	8290	0.841625
东方市	Dongfang	5.15365e-05	6.07156e-05	2583	0.848818
东营市	Dongying	0.000406679	0.000477619	7596	0.851471
本溪市	Benxi	0.000140397	0.000164466	8433	0.853653
吴忠市	Wuzhong	9.40595e-05	0.000109229	16925	0.861124
枣庄市	Zaozhuang	0.000460768	0.000528144	4575	0.872429
武汉市	Wuhan	0.000580843	0.000659102	8576	0.881263
文昌市	Wenchang	5.60837e-05	6.30645e-05	2894	0.889306
潍坊市	Weifang	0.000391939	0.000439356	16011	0.892076
泉州市	Quanzhou	0.000261554	0.000292109	11400	0.895399
图木舒克	Tumushuke	5.14067e-05	5.69366e-05	1910	0.902875
台湾省	Taiwan	0.000228244	0.000252202	38277	0.905006
石河子市	Shihezi	0.000607701	0.000670395	711	0.906482
六盘水市	Liupanshui	0.000122718	0.000134305	9926	0.913729
鞍山市	Anshan	0.000300808	0.000326182	9262	0.922209
乌鲁木齐	Urumqi	0.000287584	0.000311572	13749	0.923009
贵阳市	Guiyang	0.000324892	0.000350581	8077	0.926724
镇江市	Zhenjiang	0.000600639	0.000629775	3839	0.953735
扬州市	Yangzhou	0.000436142	0.000456668	6634	0.955054
汕头市	Shantou	0.000321909	0.000336906	2348	0.955486
合肥市	Hefei	0.000463707	0.000483232	11491	0.959597
吉林市	Jilin	0.000122274	0.000126943	27647	0.963226
包头市	Baotou	0.000208138	0.000215512	27576	0.96578
营口市	Yingkou	0.000287622	0.000297549	5496	0.966635
玉溪市	Yuxi	7.27141e-05	7.52182e-05	14981	0.966709
白山市	Baishan	5.79092e-05	5.96343e-05	17399	0.971072
呼和浩特	Huhehaote	0.000218382	0.000224821	17125	0.971355
阿拉尔市	Alaer	6.12142e-05	6.29451e-05	4086	0.972501
盘锦市	Panjin	0.000531975	0.000546915	3818	0.972683
香港特別行政區	Hong Kong	0.000662738	0.000680597	1239	0.97376
中卫市	Zhongwei	6.60264e-05	6.76529e-05	13654	0.975958
福州市	Fuzhou	0.000210255	0.000214944	12217	0.978181
西安市	Xi'an	0.000391254	0.000397514	10113	0.984254
济宁市	Jining	0.000513662	0.000521219	11132	0.985502
济南市	Jinan	0.000565301	0.000573491	10232	0.98572
定安县	Ding'an	0.000101061	0.000102085	1200	0.989962
固原市	Guyuan	7.33052e-05	7.39619e-05	10527	0.991121
石家庄	Shijiazhuang	0.000631955	0.000637549	14058	0.991224
潮州市	Chaozhou	0.00020043	0.000201866	3268	0.992885
临高县	Lingao	5.67049e-05	5.70813e-05	1392	0.993406
莆田市	Putian	0.000205384	0.000206705	4040	0.993609
常州市	Changzhou	0.000703959	0.000708005	4405	0.994285
漯河市	Luohe	0.000396531	0.000397696	2688	0.997071
澳門特別行政區	Macao	0.000330536	0.000331135	47	0.998189
澄迈县	Chengmai	0.000113667	0.000113684	2168	0.99985
太原市	Taiyuan	0.000681126	0.000681102	6878	1.00003
烟台市	Yantai	0.000392098	0.000391603	14118	1.00127
北京市	Beijing	0.000492273	0.000488338	16374	1.00806
克拉玛依	Kelamayi	0.000183607	0.000180781	7698	1.01563
佛山市	Foshan	0.00103697	0.00101744	3821	1.0192
广州市	Guangzhou	0.000786424	0.000771012	7423	1.01999
嘉兴市	Jiaxing	0.000520662	0.000510392	4615	1.02012
萍乡市	Pingxiang	0.000207591	0.000202352	3822	1.02589
沈阳市	Shenyang	0.000749732	0.000726602	12853	1.03183
泰州市	Taizhou	0.000463496	0.000449003	5770	1.03228
杭州市	Hangzhou	0.000342365	0.000331441	16869	1.03296
大连市	Dalian	0.000445905	0.000426506	13760	1.04548
大同市	Datong	0.000200829	0.000190332	14055	1.05515
威海市	Weihai	0.000402987	0.000381539	5944	1.05621
南京市	Nanjing	0.000924158	0.000872375	6595	1.05936
北海市	Beihai	0.000102001	9.62499e-05	3801	1.05975
伊犁哈萨	Yilihasa	3.22196e-05	3.03141e-05	54958	1.06286
淄博市	Zibo	0.000765156	0.000716022	5965	1.06862
聊城市	Liaocheng	0.000465748	0.000435617	8644	1.06917
焦作市	Jiaozuo	0.00061273	0.000572663	3974	1.06997
朔州市	Shuozhou	0.00023838	0.000222479	10618	1.07147
三亚市	Sanya	8.45651e-05	7.86533e-05	2493	1.07516
天水市	Tianshui	6.55673e-05	6.09705e-05	14309	1.07539
柳州市	Liuzhou	0.000108051	0.000100241	18648	1.07791
双河市	Shuanghe	6.78308e-05	6.29041e-05	965	1.07832
德州市	Dezhou	0.000408784	0.000379078	10355	1.07836
成都市	Chengdu	0.000626185	0.000577816	14369	1.08371
琼海市	Qionghai	5.53348e-05	5.10504e-05	1804	1.08393
濮阳市	Puyang	0.000450108	0.000414793	4258	1.08514
滨州市	Binzhou	0.000395746	0.00036452	9108	1.08566
海东市	Haidong	8.80775e-05	8.08573e-05	12998	1.0893
苏州市	Suzhou	0.00134482	0.00123435	8643	1.0895
攀枝花市	Panzhihua	0.00010781	9.89378e-05	7403	1.08968
淮北市	Huaibei	0.000455103	0.000417233	2748	1.09076
德阳市	Deyang	0.000256731	0.000234872	5908	1.09307
鄂尔多斯	Ordos	0.000112073	0.000102176	87046	1.09686
许昌市	Xuchang	0.000566149	0.000516045	4993	1.09709
舟山市	Zhoushan	0.000161343	0.00014692	1537	1.09817
陵水黎族	Lingshui Li	4.00709e-05	3.64828e-05	1283	1.09835
邯郸	Handan	0.000576279	0.000521049	12065	1.106
屯昌县	Tunchang	5.49629e-05	4.94023e-05	1238	1.11256
日照市	Rizhao	0.000351806	0.000315582	5425	1.11478
昌江黎族	Changjiang Li	5.30401e-05	4.75357e-05	1694	1.1158
金昌市	Jinchang	7.98719e-05	7.09754e-05	7581	1.12535
万宁市	Wanning	7.43472e-05	6.59814e-05	2366	1.12679
台州市	Taizhou	0.000208133	0.000184562	10354	1.12771
茂名市	Maoming	9.43244e-05	8.34868e-05	11482	1.12981
曲靖市	Qujing	9.15074e-05	8.09134e-05	28980	1.13093
漳州市	Zhangzhou	0.000149805	0.00013143	13592	1.13981
保亭黎族	Baoting Li	6.55873e-05	5.74812e-05	1189	1.14102
盐城市	Yancheng	0.000214327	0.000187831	15923	1.14106
临夏回族	Linxia Hui	9.24755e-05	8.10117e-05	8199	1.14151
青岛市	Qingdao	0.000741715	0.000647996	11232	1.14463
阳泉市	Yangquan	0.00039811	0.000347233	4547	1.14652
大庆市	Daqing	0.000310461	0.000270314	21103	1.14852
珠海市	Zhuhai	0.000272613	0.000237306	1939	1.14879
昆明市	Kunming	0.000184302	0.000160385	21054	1.14912
西宁市	Xining	0.000161077	0.000140137	7596	1.14942
大理白族	Dali Bai	3.15302e-05	2.73914e-05	28356	1.1511
泰安市	Tai'an	0.000521839	0.000452811	7734	1.15244
临沂市	Linyi	0.000347673	0.000301087	17200	1.15472
通化市	Tonghua	0.000108861	9.39483e-05	15525	1.15873
哈尔滨市	Harbin	0.00015067	0.000129627	52962	1.16234
中山市	Zhongshan	0.000854752	0.000734184	1824	1.16422
七台河市	Qitaihe	0.00011969	0.000102688	5435	1.16557
徐州市	Xuzhou	0.000448052	0.000383166	11220	1.16934
沧州	Cangzhou	0.00048835	0.00041666	14315	1.17206
宁波市	Ningbo	0.000523018	0.000444279	10349	1.17723
无锡市	Wuxi	0.00145847	0.0012354	4641	1.18057
南宁市	Nanning	0.000122633	0.000103816	22155	1.18125
廊坊	Langfang	0.000614534	0.000519903	6403	1.18202
芜湖市	Wuhu	0.000525844	0.000444352	6014	1.1834
唐山	Tangshan	0.00102548	0.000860374	13910	1.1919
石嘴山市	Shizuishan	0.000498218	0.000417761	4083	1.19259
马鞍山市	Maanshan	0.000579701	0.000485301	4056	1.19452
保山市	Baoshan	2.87696e-05	2.39691e-05	19109	1.20028
铜陵市	Tongling	0.000428336	0.000356726	2981	1.20074
菏泽市	Heze	0.000384572	0.000320217	12137	1.20097
新余市	Xinyu	0.000253253	0.000209086	3158	1.21124
咸阳市	Xianyang	0.00033796	0.000278257	10334	1.21456
惠州市	Huizhou	0.000204405	0.000167613	11505	1.21951
淮南市	Huainan	0.000352774	0.00028896	5538	1.22084
朝阳市	Chaoyang	0.00014791	0.000120974	19675	1.22266
湘潭市	xiangtan	0.000343938	0.000281278	5023	1.22277
金华市	Jinhua	0.00025572	0.000207838	10952	1.23038
长治市	Changzhi	0.000310069	0.000251678	13981	1.23201
晋城市	jincheng	0.000359787	0.000290605	9430	1.23806
四平市	Siping	0.000171275	0.000138329	14370	1.23818
白银市	Baiyin	6.18639e-05	4.94237e-05	20123	1.25171
铁岭市	Tieling	0.000194617	0.0001546	12958	1.25884
连云港市	Lianyungang	0.000301964	0.000239691	7562	1.2598
儋州市	Danzhou	5.02356e-05	3.95276e-05	3558	1.2709
衡水	Hengshui	0.000410905	0.00032076	8828	1.28104
牡丹江市	Mudanjiang	6.75582e-05	5.1819e-05	38759	1.30374
松原市	Songyuan	0.000148781	0.000113091	21126	1.31559
湛江市	Zhanjiang	8.47396e-05	6.37703e-05	13534	1.32883
喀什地区	Kashgar	1.913e-05	1.43422e-05	110379	1.33383
黔西南布	Qianxinan Bu	6.91074e-05	5.16069e-05	16863	1.33911
玉林市	Yulin	0.000124661	9.29268e-05	12877	1.3415
新乡市	Xinxiang	0.00048413	0.000359428	8311	1.34694
周口市	Zhoukou	0.000348328	0.000258261	11957	1.34874
开封市	Kaifeng	0.000407608	0.000298947	6246	1.36348
秦皇岛	Qinhuangdao	0.000312238	0.000228214	7849	1.36818
绥化市	Suihua	0.000133276	9.72588e-05	34840	1.37032
宿迁市	Suqian	0.000292109	0.000212755	8580	1.37298
亳州市	Bozhou	0.000321568	0.00023404	8543	1.37399
龙岩市	Longyan	8.3668e-05	6.02786e-05	19068	1.38802
阜阳市	Fuyang	0.000362403	0.000258837	10125	1.40012
运城市	Yuncheng	0.000318685	0.000227136	14214	1.40306
齐齐哈尔	Qiqihar	8.4349e-05	5.98667e-05	41786	1.40895
安顺市	Anshun	9.45316e-05	6.6868e-05	9247	1.4137
兴安盟	Xinganmeng	3.5596e-05	2.49047e-05	55126	1.42929
安阳市	Anyang	0.000485077	0.000339331	7346	1.42951
五家渠市	Wujiaqu	0.000335931	0.000233916	745	1.43612
鸡西市	Jixi	7.11228e-05	4.93334e-05	23193	1.44168
蚌埠市	Bengbu	0.000341346	0.000234393	5979	1.4563
丹东市	Dandong	0.000132633	9.09241e-05	14766	1.45872
赤峰市	chifeng	6.75528e-05	4.60818e-05	86812	1.46593
洛阳市	Luoyang	0.000356448	0.000242524	15240	1.46974
通辽市	Tongliao	0.000105817	7.16771e-05	58742	1.4763
延边朝鲜	Yanbian Korean	4.94445e-05	3.3413e-05	43226	1.4798
宜昌市	Yichang	0.000159123	0.000107514	21278	1.48002
晋中市	Jinzhong	0.000309378	0.000208796	16392	1.48172
红河哈尼	Honghe Hani	5.02128e-05	3.38729e-05	32254	1.48239
宿州市	Suzhou	0.000328297	0.000220937	9959	1.48593
昆玉市	Kunyu	2.03528e-05	1.35476e-05	653	1.50232
锦州市	Jinzhou	0.000293794	0.000195099	9999	1.50587
北屯市	Beitun	2.76185e-05	1.83362e-05	1025	1.50623
商丘市	Shangqiu	0.000334492	0.000220701	10725	1.51559
鹤壁市	Hebi	0.000507929	0.000333766	2143	1.52181
保定	Baoding	0.000479697	0.000314101	22180	1.52721
德宏傣族	Dehong	2.89131e-05	1.88577e-05	11193	1.53323
鄂州市	Ezhou	0.000452487	0.000293138	1598	1.5436
潜江市	Qianjiang	0.000328075	0.000211851	1998	1.54861
乌兰察布	Ulanqab	7.4337e-05	4.76159e-05	54386	1.56118
宁德市	Ningde	9.0389e-05	5.77969e-05	13512	1.56391
淮安市	Huai'an	0.000284154	0.00018128	9977	1.56749
株洲市	Zhuzhou	0.00020614	0.000131015	11271	1.57341
平顶山市	Pingdingshan	0.000411249	0.000260986	7916	1.57575
黄石市	Huangshi	0.000352002	0.000218382	4556	1.61186
庆阳市	Qingyang	7.63009e-05	4.69526e-05	27134	1.62506
重庆市	Chongqing	0.000234234	0.000144102	82497	1.62548
临汾市	Linfen	0.000257102	0.000158148	20304	1.6257
榆林市	Yulin	0.000128699	7.89807e-05	42917	1.6295
景德镇市	Jingdezhen	0.000176435	0.000105794	5265	1.66773
贵港市	Guigang	0.000117854	6.94681e-05	10636	1.69652
济源市	Jiyuan	0.000506329	0.000298318	1903	1.69728
铜仁市	Tongren	9.47263e-05	5.43891e-05	18048	1.74164
定西市	Dingxi	4.73888e-05	2.70851e-05	19651	1.74963
阜新市	Fuxin	0.000218648	0.000124029	10299	1.76288
宝鸡市	Baoji	0.000182977	0.000103696	18137	1.76455
吕梁市	lvliang	0.000249675	0.000141174	21153	1.76856
天门市	Tianmen	0.000323137	0.000182534	2625	1.77028
梧州市	Wuzhou	0.000100499	5.67544e-05	12604	1.77076
平凉市	Pingliang	0.000105923	5.97433e-05	11118	1.77297
阳江市	Yangjiang	0.000115571	6.51741e-05	8088	1.77327
自贡市	Zigong	0.000347086	0.000194892	4384	1.78092
临沧市	Lincang	2.93346e-05	1.64329e-05	23729	1.78512
湖州市	Huzhou	0.000462112	0.000258828	5830	1.7854
三明市	Sanming	7.92708e-05	4.43422e-05	22998	1.7877
鹰潭市	Yingtan	0.000224355	0.00012549	3573	1.78783
双鸭山市	Shuangyashan	6.77341e-05	3.77961e-05	22557	1.79209
毕节市	Bijie	0.000113511	6.24956e-05	26914	1.8163
孝感市	Xiaogan	0.000354096	0.000193836	8912	1.82679
内江市	Neijiang	0.000358906	0.000196334	5375	1.82804
佳木斯市	Jiamusi	7.19057e-05	3.93012e-05	31865	1.82961
邢台	Xingtai	0.000590478	0.000322536	12403	1.83073
防城港市	Fangchenggang	0.000107318	5.7438e-05	6235	1.86842
铜川市	Tongchuan	0.000243793	0.000130296	3901	1.87108
巴彦淖尔	Bayan Nur	6.41064e-05	3.42057e-05	65080	1.87415
江门市	Jiangmen	0.000251158	0.000133735	9715	1.87802
迪庆藏族	Diqing Tibetan	1.50242e-05	7.95075e-06	23249	1.88966
襄阳市	Xiangyang	0.000262402	0.000137988	19741	1.90162
丽江市	Lijiang	2.73244e-05	1.4361e-05	20602	1.90269
张掖市	Zhangye	3.29676e-05	1.72767e-05	38581	1.90821
白沙黎族	Baisha Li	4.19531e-05	2.19036e-05	2108	1.91535
白城市	Baicheng	8.12582e-05	4.15384e-05	25695	1.95622
凉山彝族	Liangshan Yi	3.43476e-05	1.75456e-05	60360	1.95762
肇庆市	Zhaoqing	0.000149779	7.64021e-05	14926	1.9604
渭南市	Weinan	0.000317507	0.000158319	13060	2.00548
滁州市	Chuzhou	0.000337298	0.000166807	13515	2.02208
郴州市	Chenzhou	0.000143889	7.07857e-05	19355	2.03273
武威市	Wuwei	4.59056e-05	2.2547e-05	32398	2.03599
楚雄彝族	Chuxiong Yi	4.51992e-05	2.21725e-05	28474	2.03853
桂林市	Guilin	0.000115587	5.64444e-05	27710	2.0478
仙桃市	Xiantao	0.000380445	0.000182156	2523	2.08857
汕尾市	Shanwei	0.000117441	5.61215e-05	5356	2.09261
呼伦贝尔	Hulunbeier	2.83128e-05	1.35243e-05	250514	2.09349
娄底市	Loudi	0.000236351	0.000112672	8124	2.09769
文山壮族	Wenshan Zhuang	5.00339e-05	2.36248e-05	31519	2.11786
钦州市	Qinzhou	0.000121394	5.69928e-05	10953	2.12999
安庆市	Anqing	0.000270347	0.000125677	13510	2.15113
三门峡市	Sanmenxia	0.000256951	0.000119306	9941	2.15371
赣州市	Ganzhou	9.42544e-05	4.37221e-05	39453	2.15576
绵阳市	Mianyang	0.000132697	6.12058e-05	20318	2.16805
遵义市	Zunyi	0.00014192	6.51223e-05	30833	2.17929
乐东黎族	Ledong Li	3.09273e-05	1.39442e-05	3011	2.21794
黔南布依	Qiannan Buyi	7.90483e-05	3.56103e-05	26192	2.21981
张家口	Zhangjiakou	0.000163222	7.33854e-05	36719	2.22418
遂宁市	Suining	0.000303723	0.000136087	5330	2.23182
衢州市	Quzhou	0.0002051	9.18227e-05	8856	2.23365
六安市	Liuan	0.000279199	0.000124873	15438	2.23586
眉山市	Meishan	0.000288198	0.000128426	7212	2.24408
衡阳市	Hengyang	0.0002554	0.000112092	15333	2.27848
宜春市	Yichun	0.000230148	0.000100972	18708	2.27932
忻州市	Xinzhou	0.000178594	7.8228e-05	25194	2.28299
葫芦岛市	Huludao	0.000262406	0.000114412	10573	2.29351
塔城地区	Tacheng	4.50955e-05	1.9585e-05	94693	2.30255
酒泉市	Jiuquan	1.68073e-05	7.18564e-06	167501	2.33901
西双版纳	Xishuangbanna	2.87683e-05	1.22068e-05	19109	2.35675
延安市	Yan'an	9.65301e-05	4.03076e-05	37017	2.39484
汉中市	Hanzhong	9.52058e-05	3.96794e-05	27094	2.39937
岳阳市	Yueyang	0.000299779	0.000124523	14898	2.40742
阿克苏地	Aksu	2.70305e-05	1.11902e-05	127436	2.41556
琼中黎族	Qiongzhong Li	3.55392e-05	1.45187e-05	2672	2.44782
驻马店市	Zhumadian	0.000349179	0.000141874	15092	2.46118
恩施土家	Enshi Tujia	8.12742e-05	3.3008e-05	24136	2.46226
南平市	Nanping	7.32343e-05	2.91315e-05	26330	2.51392
达州市	Dazhou	0.000178352	7.09094e-05	16615	2.51522
南充市	Nanchong	0.000254433	0.000100306	12485	2.53656
梅州市	Meizhou	9.91016e-05	3.83516e-05	15884	2.58403
宣城市	Xuancheng	0.000300813	0.000116357	12330	2.58527
可克达拉	Cocodala	0.000113385	4.35937e-05	1028	2.60095
陇南市	Longnan	5.17177e-05	1.98539e-05	27928	2.60492
南阳市	Nanyang	0.000306182	0.000116902	26504	2.61912
乐山市	Leshan	0.000196334	7.47105e-05	12782	2.62793
来宾市	Laibin	0.000111648	4.21184e-05	13413	2.6508
常德市	Changde	0.000235392	8.77508e-05	18218	2.68251
宜宾市	Yibin	0.000250903	9.33924e-05	13304	2.68655
池州市	Chizhou	0.000259684	9.65715e-05	8403	2.68903
黄冈市	Huanggang	0.000239826	8.88814e-05	17465	2.69826
信阳市	Xinyang	0.000302033	0.000110956	18926	2.7221
普洱市	Pu'er	2.84225e-05	1.04286e-05	44365	2.72544
丽水市	Lishui	0.000125396	4.59012e-05	17297	2.73187
承德	Chengde	0.000177492	6.48063e-05	39404	2.73881
上饶市	Shangrao	0.000188615	6.8782e-05	22765	2.74222
黄山市	Huangshan	0.000181635	6.61828e-05	9694	2.74444
抚州市	Fuzhou	0.000157303	5.73081e-05	18820	2.74487
五指山市	Wuzhishan	3.16464e-05	1.13915e-05	1120	2.77807
鹤岗市	Hegang	0.000109749	3.93106e-05	14865	2.79185
百色市	Baise	7.14049e-05	2.55357e-05	36290	2.79628
荆门市	Jingmen	0.000277482	9.84457e-05	12361	2.81863
巴音郭楞	Bayingol	1.53773e-05	5.44879e-06	470517	2.82216
泸州市	Luzhou	0.000269484	9.51839e-05	12262	2.8312
雅安市	Ya'an	8.25062e-05	2.82709e-05	15017	2.91842
益阳市	Yiyang	0.000265786	9.08311e-05	12339	2.92615
资阳市	Ziyang	0.000343652	0.000117117	5764	2.93427
怒江傈僳	Nujiang Lisu	1.56911e-05	5.33842e-06	14604	2.93929
邵阳市	Shaoyang	0.000179191	6.03771e-05	20871	2.96787
黔东南苗	Qiandongnan Miao	8.13819e-05	2.70659e-05	30308	3.00681
九江市	Jiujiang	0.000225026	7.44472e-05	19144	3.02263
荆州市	Jingzhou	0.000328134	0.000107702	14115	3.04669
昭通市	Zhaotong	0.000101208	3.31836e-05	22502	3.04994
贺州市	Hezhou	0.000104555	3.41233e-05	11743	3.06404
云浮市	Yunfu	0.000159995	5.19284e-05	7808	3.08108
广安市	Guang'an	0.000382222	0.000124046	6349	3.08129
广元市	Guangyuan	0.000106875	3.38514e-05	16350	3.15718
博尔塔拉	Bortala	4.20023e-05	1.33018e-05	23704	3.15763
海南藏族	Hainan Tibetan	1.66397e-05	5.238e-06	43635	3.17674
昌吉回族	Changji Hui	0.000107251	3.35805e-05	73294	3.19385
拉萨市	Lhasa	3.99039e-05	1.23432e-05	29726	3.23287
永州市	Yongzhou	0.000158888	4.88081e-05	22349	3.25536
崇左市	Chongzuo	0.000113154	3.33701e-05	17385	3.39089
咸宁市	Xianning	0.000304961	8.93345e-05	9752	3.4137
吉安市	Ji'an	0.000158397	4.57543e-05	25317	3.4619
甘南藏族	Gannan Tibetan	2.14874e-05	6.11851e-06	36670	3.51188
锡林郭勒	Xilingole	4.3479e-05	1.1981e-05	199430	3.629
韶关市	Shaoguan	0.000116131	3.17965e-05	18431	3.65232
湘西土家	Xiangxi Tujia	0.000112541	3.03382e-05	15520	3.70954
海西蒙古	Haixi Mongolian	1.07632e-05	2.87323e-06	300758	3.74604
黄南藏族	Huangnan Tibetan	1.98564e-05	5.20489e-06	18041	3.81495
巴中市	Bazhong	0.000133058	3.44542e-05	12311	3.86189
十堰市	Shiyan	0.000168591	4.36493e-05	23744	3.8624
安康市	Ankang	0.000123525	3.14795e-05	23519	3.92398
河源市	Heyuan	0.000111588	2.81232e-05	15679	3.96781
伊春市	Yichun	7.77097e-05	1.82744e-05	32753	4.25239
怀化市	Huaihua	0.000138981	3.25537e-05	27599	4.26928
哈密市	Hami	3.10951e-05	7.23182e-06	136977	4.29976
清远市	Qingyuan	0.000151121	3.49778e-05	19065	4.32049
阿勒泰地	Altay	1.9788e-05	4.48973e-06	116459	4.4074
海北藏族	Haibei Tibetan	2.02007e-05	4.58246e-06	34412	4.40826
张家界市	Zhangjiajie	0.000129975	2.91272e-05	9566	4.4623
随州市	Suizhou	0.000278392	5.99874e-05	9617	4.64084
河池市	Hechi	8.10241e-05	1.69631e-05	33608	4.77649
吐鲁番市	Turpan	5.24245e-05	1.08071e-05	69617	4.85095
阿拉善盟	Alashan	3.36631e-05	6.53271e-06	239173	5.15301
昌都市	Changdu	1.36011e-05	2.47222e-06	109965	5.50159
商洛市	Shangluo	0.000179762	3.21857e-05	19581	5.58515
克孜勒苏	Kizilsu	2.07057e-05	3.65737e-06	69714	5.66136
山南市	Shannan	1.60083e-05	2.75593e-06	79003	5.80868
黑河市	Heihe	5.73072e-05	9.38607e-06	66997	6.10556
大兴安岭	Daxinganling	1.82546e-05	2.8526e-06	65907	6.3993
日喀则市	Rikaze	1.28102e-05	1.9981e-06	179429	6.41119
和田地区	Hotan	1.2866e-05	1.89424e-06	247044	6.79217
阿坝藏族	Aba Tibetan	2.58553e-05	2.962e-06	83074	8.72899
林芝市	Linzhi	1.33852e-05	1.21585e-06	114855	11.0089
甘孜藏族	Ganzi Tibetan	1.58936e-05	1.29836e-06	149910	12.2413
神农架林	Shennongjia	7.17385e-05	4.72038e-06	3229	15.1976
果洛藏族	Golog Tibetan	1.24166e-05	6.90251e-07	74373	17.9885
那曲地区	Nagqu	9.68969e-06	4.21422e-07	353265	22.9929
玉树藏族	Yushu Tibetan	1.0717e-05	3.38908e-07	205080	31.6222
阿里地区	Ali	1.12172e-05	1.18673e-07	337371	94.5218
三沙市	Sansha	3.381e-05	0	4678	#DIV/0!
